# Supplementary material for: Single mosquito metatranscriptomics identifies vectors, emerging pathogens and reservoirs in one assay
Source: eLife. 2021 Apr 27;10:e68353. doi: 10.7554/eLife.68353 (PMC8110308; doi:10.7554/eLife.68353)
Supplement: Figure 1—source data 1. [file elife-68353-fig1-data1.xlsx]

## Sheet: TableS1_Sample_Demographics.csv
Sequence ID	Specimen ID	Genus*	Species*	Sex**	Collection date	Trap typeÊ	CountyÊÊ	Trap Latitude	Trap Longitude	Habitat Typeˆ	Population Typeˆ	Blood fed status**ææ	RNA concentration, ng/uL	Visual Genus	Visual Species
CMS001_001_Ra_S1	CMS001_001	Culex	erythrothorax	female	2017-10-03	EVS	ALCO	37.557	-122.079	Marsh/Swamp	suburban	blood fed	27.3	Culex	erythrothorax
CMS001_002_Ra_S1	CMS001_002	Culex	tarsalis	female	2017-09-21	EVS	ALCO	37.557	-122.079	Marsh/Swamp	suburban	blood fed	59.8	Culex	tarsalis
CMS001_003_Ra_S2	CMS001_003	Culiseta	particeps	female	2017-09-19	EVS	ALCO	37.557	-122.079	Marsh/Swamp	suburban	blood fed	88.9	Culiseta	particeps
CMS001_004_Ra_S2	CMS001_004	Culex	pipiens	female	2017-09-12	EVS	ALCO	37.7152	-122.194	Commercial/Industrial/Transportation	urban	blood fed	88.4	Culex	pipiens
CMS001_005_Ra_S3	CMS001_005	Culiseta	incidens	female	2017-09-29	EVS	ALCO	37.7889	-122.299	Residential	suburban	blood fed	240.7	Culiseta	incidens
CMS001_006_Ra_S5	CMS001_006	Culex	erythrothorax	female	2017-09-19	EVS	ALCO	37.557	-122.079	Marsh/Swamp	suburban	blood fed	32.5	Culex	erythrothorax
CMS001_007_Ra_S12	CMS001_007	Culex	erythrothorax	female	2017-09-19	EVS	ALCO	37.557	-122.079	Marsh/Swamp	suburban	blood fed	62	Culex	erythrothorax
CMS001_008_Ra_S3	CMS001_008	Culiseta	particeps	female	2017-09-19	EVS	ALCO	37.557	-122.079	Marsh/Swamp	suburban	blood fed	150	Culiseta	particeps
CMS001_009_Ra_S13	CMS001_009	Culiseta	particeps	female	2017-09-19	EVS	ALCO	37.557	-122.079	Marsh/Swamp	suburban	blood fed	93	Culiseta	particeps
CMS001_010_Ra_S1	CMS001_010	Culex	erythrothorax	female	2017-09-19	EVS	ALCO	37.557	-122.079	Marsh/Swamp	suburban	blood fed	14.7	Culex	erythrothorax
CMS001_011_Ra_S4	CMS001_011	Culex	erythrothorax	female	2017-09-19	EVS	ALCO	37.557	-122.079	Marsh/Swamp	suburban	blood fed	55	Culex	erythrothorax
CMS001_012_Ra_S4	CMS001_012	Aedes	dorsalis	female	2017-09-19	EVS	ALCO	37.557	-122.079	Marsh/Swamp	suburban	blood fed	86.1	Aedes	dorsalis
CMS001_013_Ra_S5	CMS001_013	Culex	erythrothorax	female	2017-09-19	EVS	ALCO	37.557	-122.079	Marsh/Swamp	suburban	blood fed	37.2	Culex	erythrothorax
CMS001_014_Ra_S5	CMS001_014	Culiseta	incidens	female	2017-10-06	EVS	ALCO	37.5819	-122.048	Marsh/Swamp	suburban	blood fed	65	Culiseta	incidens
CMS001_015_Ra_S13	CMS001_015	Culex	erythrothorax	female	2017-09-27	EVS	ALCO	37.557	-122.079	Marsh/Swamp	suburban	blood fed	63.2	Culex	erythrothorax
CMS001_016_Ra_S6	CMS001_016	Culiseta	inornata	female	2017-10-06	EVS	ALCO	37.5819	-122.049	Marsh/Swamp	suburban	blood fed	153.4	Culiseta	inornata
CMS001_017_Ra_S6	CMS001_017	Culex	erythrothorax	female	2017-10-06	EVS	ALCO	37.5819	-122.048	Marsh/Swamp	suburban	blood fed	73.9	Culex	erythrothorax
CMS001_018_Ra_S14	CMS001_018	Culex	erythrothorax	female	2017-09-27	EVS	ALCO	37.557	-122.079	Marsh/Swamp	suburban	blood fed	46.4	Culex	erythrothorax
CMS001_019_Ra_S14	CMS001_019	Culex	erythrothorax	female	2017-10-04	EVS	ALCO	37.557	-122.079	Marsh/Swamp	suburban	blood fed	59.4	Culex	erythrothorax
CMS001_020_Ra_S15	CMS001_020	Culex	erythrothorax	female	2017-10-06	EVS	ALCO	37.5819	-122.049	Marsh/Swamp	suburban	blood fed	33.6	Culex	erythrothorax
CMS001_021_Ra_S16	CMS001_021	Culex	erythrothorax	female	2017-10-06	EVS	ALCO	37.5819	-122.048	Marsh/Swamp	suburban	blood fed	32.2	Culex	erythrothorax
CMS001_022_Ra_S6	CMS001_022	Culex	erythrothorax	female	2017-09-27	EVS	ALCO	37.557	-122.079	Marsh/Swamp	suburban	blood fed	27.4	Culex	erythrothorax
CMS001_023_Ra_S17	CMS001_023	Culex	erythrothorax	female	2017-10-06	EVS	ALCO	37.5819	-122.048	Marsh/Swamp	suburban	blood fed	98.8	Culex	erythrothorax
CMS001_024_Ra_S15	CMS001_024	Culex	erythrothorax	female	2017-10-06	EVS	ALCO	37.5819	-122.048	Marsh/Swamp	suburban	blood fed	3.1	Culex	erythrothorax
CMS001_025_Ra_S7	CMS001_025	Culiseta	particeps	female	2017-09-21	EVS	ALCO	37.557	-122.079	Marsh/Swamp	suburban	blood fed	120	Culex	tarsalis
CMS001_026_Ra_S18	CMS001_026	Culiseta	incidens	female	2017-09-19	EVS	ALCO	37.5095	-121.931	Park/cemetary/golf course	suburban	blood fed	60.6	Culex	tarsalis
CMS001_027_Ra_S16	CMS001_027	Culex	tarsalis	female	2017-09-12	EVS	ALCO	37.8665	-122.311	Park/cemetary/golf course	urban	blood fed	49.1	Culex	tarsalis
CMS001_028_Ra_S17	CMS001_028	Culex	tarsalis	female	2017-09-12	EVS	ALCO	37.7152	-122.194	Commercial/Industrial/Transportation	urban	blood fed	96	Culex	tarsalis
CMS001_029_Ra_S18	CMS001_029	Culex	pipiens	female	2017-09-13	EVS	ALCO	37.6847	-121.913	Park/cemetary/golf course	suburban	blood fed	82	Culex	pipiens
CMS001_030_Ra_S7	CMS001_030	Culex	pipiens	female	2017-09-10	EVS	ALCO	37.7152	-122.194	Commercial/Industrial/Transportation	urban	blood fed	273	Culex	pipiens
CMS001_031_Ra_S19	CMS001_031	Culex	tarsalis	female	2017-09-13	EVS	ALCO	37.8063	-122.257	Park/cemetary/golf course	urban	blood fed	28.2	Culex	tarsalis
CMS001_032_Ra_S7	CMS001_032	Culex	tarsalis	female	2017-09-12	EVS	ALCO	37.6613	-122.133	Park/cemetary/golf course	suburban	blood fed	124.3	Culex	tarsalis
CMS001_033_Ra_S8	CMS001_033	Culex	tarsalis	female	2017-09-11	EVS	ALCO	37.557	-122.079	Marsh/Swamp	suburban	blood fed	32.4	Culex	tarsalis
CMS001_034_Ra_S19	CMS001_034	Culex	tarsalis	female	2017-09-11	EVS	ALCO	37.557	-122.079	Marsh/Swamp	suburban	blood fed	56.6	Culex	tarsalis
CMS001_035_Ra_S20	CMS001_035	Culex	erythrothorax	female	2017-09-11	EVS	ALCO	37.557	-122.079	Marsh/Swamp	suburban	blood fed	28.8	Culex	erythrothorax
CMS001_036_Ra_S20	CMS001_036	Culex	tarsalis	female	2017-09-11	EVS	ALCO	37.557	-122.079	Marsh/Swamp	suburban	blood fed	36.2	Culex	tarsalis
CMS001_037_Ra_S21	CMS001_037	Culex	erythrothorax	female	2017-08-18	EVS	ALCO	37.557	-122.079	Marsh/Swamp	suburban	blood fed	42.4	Culex	erythrothorax
CMS001_038_Ra_S22	CMS001_038	Culex	tarsalis	female	2017-08-24	EVS	ALCO	37.5839	-122.092	Marsh/Swamp	suburban	blood fed	74.2	Culex	tarsalis
CMS001_039_Ra_S9	CMS001_039	Culex	tarsalis	female	2017-08-24	EVS	ALCO	37.5839	-122.092	Marsh/Swamp	suburban	blood fed	104	Culex	tarsalis
CMS001_040_Ra_S21	CMS001_040	Culex	pipiens	female	2017-08-31	EVS	ALCO	37.4995	-121.934	Undeveloped	urban	blood fed	27	Culex	tarsalis
CMS001_041_Ra_S10	CMS001_041	Culex	pipiens	female	2017-08-31	EVS	ALCO	37.4995	-121.934	Undeveloped	urban	blood fed	48	Culex	pipiens
CMS001_042_Ra_S23	CMS001_042	Culex	tarsalis	female	2017-08-25	EVS	ALCO	37.6613	-122.133	Park/cemetary/golf course	suburban	blood fed	96	Culex	tarsalis
CMS001_043_Ra_S24	CMS001_043	Culex	tarsalis	female	2017-08-25	EVS	ALCO	37.6613	-122.133	Park/cemetary/golf course	suburban	blood fed	134	Culex	tarsalis
CMS001_044_Ra_S25	CMS001_044	Culex	pipiens	female	2017-08-25	EVS	ALCO	37.6613	-122.133	Park/cemetary/golf course	suburban	blood fed	62	Culex	pipiens
CMS001_045_Ra_S2	CMS001_045	Culex	erythrothorax	female	2017-08-03	EVS	ALCO	37.557	-122.079	Marsh/Swamp	suburban	blood fed	6.1	Culex	tarsalis
CMS001_046_Ra_S3	CMS001_046	Culex	tarsalis	female	2017-08-03	EVS	ALCO	37.557	-122.079	Marsh/Swamp	suburban	blood fed	29.4	Culex	tarsalis
CMS001_047_Ra_S4	CMS001_047	Culex	erythrothorax	female	2017-08-03	EVS	ALCO	37.557	-122.079	Marsh/Swamp	suburban	blood fed	48.4	Culex	erythrothorax
CMS001_048_Ra_S5	CMS001_048	Culex	erythrothorax	female	2017-08-03	EVS	ALCO	37.557	-122.079	Marsh/Swamp	suburban	blood fed	29.4	Culex	erythrothorax
CMS001_049_Ra_S6	CMS001_049	Culex	erythrothorax	female	2017-08-03	EVS	ALCO	37.557	-122.079	Marsh/Swamp	suburban	blood fed	54.4	Culex	erythrothorax
CMS001_050_Ra_S23	CMS001_050	Culex	erythrothorax	female	2017-10-17	EVS	ALCO	37.5061	-121.999	Marsh/Swamp	urban	blood fed	57	Culex	erythrothorax
CMS001_051_Ra_S8	CMS001_051	Culex	tarsalis	female	2017-10-17	EVS	ALCO	37.5061	-121.999	Marsh/Swamp	urban	blood fed	94.3	Culex	tarsalis
CMS001_052_Ra_S7	CMS001_052	Culex	erythrothorax	female	2017-09-21	EVS	ALCO	37.557	-122.079	Marsh/Swamp	suburban	blood fed	63.4	Culex	erythrothorax
CMS001_053_Ra_S8	CMS001_053	Culex	erythrothorax	female	2017-10-07	EVS	ALCO	37.557	-122.079	Marsh/Swamp	suburban	blood fed	75.6	Culex	erythrothorax
CMS001_054_Ra_S11	CMS001_054	Culex	pipiens	female	2016-02-10	EVS	ALCO	37.6308	-122.143	Marsh/Swamp	suburban	blood fed	69.6	Culex	pipiens
CMS001_055_Ra_S9	CMS001_055	Culex	erythrothorax	female	2017-09-21	EVS	ALCO	37.557	-122.079	Marsh/Swamp	suburban	blood fed	34.8	Culex	erythrothorax
CMS001_056_Ra_S10	CMS001_056	Culex	erythrothorax	female	2017-09-21	EVS	ALCO	37.557	-122.079	Marsh/Swamp	suburban	blood fed	33.6	Culex	erythrothorax
CMS001_057_Ra_S11	CMS001_057	Culex	erythrothorax	female	2017-09-21	EVS	ALCO	37.557	-122.079	Marsh/Swamp	suburban	blood fed	26.6	Culex	erythrothorax
CMS001_058_Ra_S9	CMS001_058	Culex	erythrothorax	female	2017-09-21	EVS	ALCO	37.557	-122.079	Marsh/Swamp	suburban	blood fed	82.5	NA	NA
CMS001_059_Ra_S10	CMS001_059	Culex	pipiens	female	2017-10-24	EVS	ALCO	37.6683	-122.159	Commerical/Industrial/Transportation	urban	blood fed	201	Culex	pipiens
CMS001_060_Ra_S12	CMS001_060	Culiseta	inornata	female	2017-10-23	EVS	ALCO	37.557	-122.079	Marsh/Swamp		blood fed	66	Culiseta	inornata
CMS002_001a_Rb_S116_L004	CMS002_001a	Culex	quinquefasciatus	female	2017-11-15	Gravid	SAND	32.7963	-116.96	Park/cemetary/golf course	urban	blood fed	78.4	Culex	quinquefasciatus
CMS002_004a_Rb_S117_L004	CMS002_004a	Culex	quinquefasciatus	female	2017-11-15	Gravid	SAND	32.7992	-116.919	Park/cemetary/golf course	suburban	blood fed	101.6	Culex	quinquefasciatus
CMS002_007a_Rb_S118_L004	CMS002_007a	Culiseta	incidens	female	2017-11-15	Gravid	SAND	32.7856	-116.989	Park/cemetary/golf course	suburban	blood fed	103.2	Culex	quinquefasciatus
CMS002_010a_Rb_S119_L004	CMS002_010a	Culex	quinquefasciatus	female	2017-11-15	Gravid	SAND	32.7982	-116.954	Commerical/Industrial/Transportation	urban	blood fed	264	Culex	quinquefasciatus
CMS002_013a_Rb_S120_L004	CMS002_013a	Culex	quinquefasciatus	female	2017-11-15	Gravid	SAND	32.7996	-116.939	Residential	suburban	blood fed	30.6	Culex	quinquefasciatus
CMS002_016a_Rb_S121_L004	CMS002_016a	Aedes	aegypti	female	2017-11-15	BG	SAND	32.7152	-117.115	Commerical/Industrial/Transportation	suburban	unfed	81.6	Aedes	aegypti
CMS002_017a_Rb_S122_L004	CMS002_017a	Aedes	aegypti	female	2017-11-28	AGO	SAND	32.5543	-117.048	Residential	suburban	unfed	62.4	Aedes	aegypti
CMS002_017b_Rb_S123_L004	CMS002_017b	Aedes	aegypti	female	2017-11-28	AGO	SAND	32.5543	-117.048	Residential	suburban	unfed	54.4	Aedes	aegypti
CMS002_017c_Rb_S124_L004	CMS002_017c	Aedes	aegypti	female	2017-11-28	AGO	SAND	32.5543	-117.048	Residential	suburban	unfed	34.8	Aedes	aegypti
CMS002_017d_Rb_S125_L004	CMS002_017d	Aedes	aegypti	female	2017-11-28	AGO	SAND	32.5543	-117.048	Residential	suburban	unfed	40.8	Aedes	aegypti
CMS002_017e_Rb_S126_L004	CMS002_017e	Aedes	aegypti	female	2017-11-28	AGO	SAND	32.5543	-117.048	Residential	suburban	unfed	45.2	Aedes	aegypti
CMS002_018a_Rb_S128_L004	CMS002_018a	Aedes	aegypti	female	2018-11-28	AGO	SAND	32.6952	-117.122	Commerical/Industrial/Transportation	urban	unfed	138.4	Aedes	aegypti
CMS002_018b_Rb_S129_L004	CMS002_018b	Aedes	aegypti	female	2018-11-28	AGO	SAND	32.6952	-117.122	Commerical/Industrial/Transportation	urban	unfed	32.4	Aedes	aegypti
CMS002_019a_Rb_S130_L004	CMS002_019a	Aedes	aegypti	female	2017-11-29	AGO	SAND	32.7603	-117.081	Residential	suburban	unfed	38.7	Aedes	aegypti
CMS002_020a_Rb_S131_L004	CMS002_020a	Culiseta	particeps	female	2017-12-01	EVS	SAND	32.9407	-117.216	Undeveloped	suburban	unfed	135.2	Culiseta	particeps
CMS002_020b_Rb_S132_L004	CMS002_020b	Culiseta	particeps	female	2017-12-01	EVS	SAND	32.9407	-117.216	Undeveloped	suburban	unfed	260.8	Culiseta	particeps
CMS002_020c_Rb_S133_L004	CMS002_020c	Culiseta	particeps	female	2017-12-01	EVS	SAND	32.9407	-117.216	Undeveloped	suburban	unfed	148	Culiseta	particeps
CMS002_020d_Rb_S134_L004	CMS002_020d	Culiseta	particeps	female	2017-12-01	EVS	SAND	32.9407	-117.216	Undeveloped	suburban	unfed	242.4	Culiseta	particeps
CMS002_020e_Rb_S135_L004	CMS002_020e	Culiseta	particeps	female	2017-12-01	EVS	SAND	32.9407	-117.216	Undeveloped	suburban	unfed	145.6	Culiseta	particeps
CMS002_021a_Rb_S136_L004	CMS002_021a	Culiseta	particeps	female	2017-12-27	EVS	SAND	32.9407	-117.216	Undeveloped	suburban	unfed	235.2	Culiseta	particeps
CMS002_022a_Rb_S137_L004	CMS002_022a	Culex	quinquefasciatus	female	2017-12-27	EVS	SAND	32.5528	-117.056	Undeveloped	suburban	unfed	96	Culex	quinquefasciatus
CMS002_023a_Rb_S138_L004	CMS002_023a	Culex	quinquefasciatus	female	2017-12-27	EVS	SAND	32.5928	-117.058	Commerical/Industrial/Transportation	urban	unfed	61.6	Culex	quinquefasciatus
CMS002_025a_Rb_S140_L004	CMS002_025a	Aedes	aegypti	NA	2017-08-23	EVS	WVAL	33.9546	-117.694	Residential	suburban	unfed	ND	Aedes	aegypti
CMS002_025b_Rb_S141_L004	CMS002_025b	Aedes	aegypti	NA	2017-08-23	EVS	WVAL	33.9546	-117.694	Residential	suburban	unfed	ND	Aedes	aegypti
CMS002_025c_Rb_S142_L004	CMS002_025c	Aedes	aegypti	NA	2017-08-23	EVS	WVAL	33.9546	-117.694	Residential	suburban	unfed	40.8	Aedes	aegypti
CMS002_025d_Rb_S143_L004	CMS002_025d	Aedes	aegypti	NA	2017-08-23	EVS	WVAL	33.9546	-117.694	Residential	suburban	unfed	50.8	Aedes	aegypti
CMS002_025e_Rb_S144_L004	CMS002_025e	Aedes	aegypti	NA	2017-08-23	EVS	WVAL	33.9546	-117.694	Residential	suburban	unfed	36.64	Aedes	aegypti
CMS002_025f_Rb_S145_L004	CMS002_025f	Aedes	aegypti	NA	2017-08-23	EVS	WVAL	33.9546	-117.694	Residential	suburban	unfed	296	Aedes	aegypti
CMS002_026a_Rb_S146_L004	CMS002_026a	Aedes	albopictus	NA	2017-08-29	EVS	WVAL	34.1559	-117.667	Residential	suburban	unfed	29.12	Aedes	albopictus
CMS002_026b_Rb_S147_L004	CMS002_026b	Aedes	albopictus	NA	2017-08-29	EVS	WVAL	34.1559	-117.667	Residential	suburban	unfed	26.96	Aedes	albopictus
CMS002_026c_Rb_S148_L004	CMS002_026c	Aedes	albopictus	NA	2017-08-29	EVS	WVAL	34.1559	-117.667	Residential	suburban	unfed	18.4	Aedes	albopictus
CMS002_026d_Rb_S149_L004	CMS002_026d	Aedes	albopictus	NA	2017-08-29	EVS	WVAL	34.1559	-117.667	Residential	suburban	unfed	119.2	Aedes	albopictus
CMS002_026e_Rb_S150_L004	CMS002_026e	Aedes	albopictus	NA	2017-08-29	EVS	WVAL	34.1559	-117.667	Residential	suburban	unfed	27.44	Aedes	albopictus
CMS002_027a_Rb_S152_L004	CMS002_027a	Culex	quinquefasciatus	NA	2017-11-15	OVI	WVAL	34.1509	-117.643	Residential	suburban	unfed	189.6	Culex	quinquefasciatus
CMS002_027b_Rb_S153_L004	CMS002_027b	Culex	pipiens	NA	2017-11-15	OVI	WVAL	34.1509	-117.643	Residential	suburban	unfed	191.2	Culex	quinquefasciatus
CMS002_028a_Rb_S154_L004	CMS002_028a	Culex	erythrothorax	NA	2017-11-15	EVS	WVAL	33.935	-117.656	Marsh/Swamp	rural	unfed	82.4	Culex	erythrothorax
CMS002_028b_Rb_S155_L004	CMS002_028b	Culex	erythrothorax	NA	2017-11-15	EVS	WVAL	33.935	-117.656	Marsh/Swamp	rural	unfed	104.8	Culex	erythrothorax
CMS002_028c_Rb_S156_L004	CMS002_028c	Culex	erythrothorax	NA	2017-11-15	EVS	WVAL	33.935	-117.656	Marsh/Swamp	rural	unfed	48.4	Culex	erythrothorax
CMS002_028d_Rb_S157_L004	CMS002_028d	Culex	erythrothorax	NA	2017-11-15	EVS	WVAL	33.935	-117.656	Marsh/Swamp	rural	unfed	57.2	Culex	erythrothorax
CMS002_028e_Rb_S158_L004	CMS002_028e	Culex	erythrothorax	NA	2017-11-15	EVS	WVAL	33.935	-117.656	Marsh/Swamp	rural	unfed	79.6	Culex	erythrothorax
CMS002_029a_Rb_S159_L004	CMS002_029a	Culex	tarsalis	NA	2017-11-15	EVS	WVAL	33.9258	-117.66	Residential	suburban	unfed	121.6	Culex	tarsalis
CMS002_029b_Rb_S160_L004	CMS002_029b	Culex	tarsalis	NA	2017-11-15	EVS	WVAL	33.9258	-117.66	Residential	suburban	unfed	179.2	Culex	tarsalis
CMS002_029c_Rb_S161_L004	CMS002_029c	Culex	tarsalis	NA	2017-11-15	EVS	WVAL	33.9258	-117.66	Residential	suburban	unfed	179.2	Culex	tarsalis
CMS002_029d_Rb_S162_L004	CMS002_029d	Culex	tarsalis	NA	2017-11-15	EVS	WVAL	33.9258	-117.66	Residential	suburban	unfed	116.8	Culex	tarsalis
CMS002_029e_Rb_S164_L004	CMS002_029e	Culex	tarsalis	female	2017-11-15	EVS	WVAL	33.9258	-117.66	Residential	suburban	unfed	47.2	Culex	tarsalis
CMS002_031a_Rb_S165_L004	CMS002_031a	Culex	tarsalis	female	2017-11-07	CO2	COAV	33.5168	-116.082	Marsh/Swamp	rural	unfed	27.68	Culex	tarsalis
CMS002_032a_Rb_S166_L004	CMS002_032a	Culex	tarsalis	male	2017-11-07	CO2	COAV	33.5168	-116.082	Marsh/Swamp	rural	unfed	20	Culex	tarsalis
CMS002_033a_Rb_S167_L004	CMS002_033a	Culex	tarsalis	female	2017-11-07	CO2	COAV	33.5692	-116.079	Undeveloped	suburban	unfed	58	Culex	tarsalis
CMS002_034a_Rb_S168_L004	CMS002_034a	Culex	tarsalis	male	2017-11-07	CO2	COAV	33.5692	-116.079	Undeveloped	suburban	unfed	39.84	Culex	tarsalis
CMS002_035a_Rb_S169_L004	CMS002_035a	Culex	tarsalis	female	2017-11-07	CO2	COAV	33.54	-116.079	Agriculture	rural	unfed	30.32	Culex	tarsalis
CMS002_036a_Rb_S170_L004	CMS002_036a	Culex	tarsalis	male	2017-11-07	CO2	COAV	33.54	-116.079	Agriculture	rural	unfed	ND	Culex	tarsalis
CMS002_037a_Rb_S171_L004	CMS002_037a	Culex	tarsalis	female	2017-11-07	CO2	COAV	33.4636	-116.074	Agriculture	rural	unfed	73.2	Culex	tarsalis
CMS002_038a_Rb_S172_L004	CMS002_038a	Culex	tarsalis	female	2017-11-07	CO2	COAV	33.5291	-116.035	Agriculture	rural	unfed	31.12	Culex	tarsalis
CMS002_039a_Rb_S173_L004	CMS002_039a	Culex	tarsalis	female	2017-11-07	CO2	COAV	33.5325	-116.061	Marsh/Swamp	rural	unfed	28.72	Culex	tarsalis
CMS002_040a_Rb_S174_L004	CMS002_040a	Culex	tarsalis	male	2017-11-07	CO2	COAV	33.5325	-116.061	Marsh/Swamp	rural	unfed	31.12	Culex	tarsalis
CMS002_041a_Rb_S176_L004	CMS002_041a	Culex	tarsalis	female	2017-11-07	CO2	COAV	33.5108	-115.921	Marsh/Swamp	rural	unfed	20.72	Culex	tarsalis
CMS002_042a_Rb_S177_L004	CMS002_042a	Culex	tarsalis	female	2017-11-07	CO2	COAV	33.5255	-115.957	Agriculture	rural	unfed	54.4	Culex	tarsalis
CMS002_044a_Rb_S178_L004	CMS002_044a	Aedes	aegypti	NA	2017-08-23	EVS	WVAL	33.9545	-117.693	Residential	suburban	unfed	41.6	Aedes	aegypti
CMS002_044b_Rb_S179_L004	CMS002_044b	Aedes	aegypti	NA	2017-08-23	EVS	WVAL	33.9545	-117.693	Residential	suburban	unfed	16	Aedes	aegypti
CMS002_044c_Rb_S180_L004	CMS002_044c	Aedes	aegypti	NA	2017-08-23	EVS	WVAL	33.9545	-117.693	Residential	suburban	unfed	74.8	Aedes	aegypti
CMS002_044d_Rb_S181_L004	CMS002_044d	Aedes	aegypti	NA	2017-08-23	EVS	WVAL	33.9545	-117.693	Residential	suburban	unfed	31.04	Aedes	aegypti
CMS002_044e_Rb_S182_L004	CMS002_044e	Aedes	aegypti	NA	2017-08-23	EVS	WVAL	33.9545	-117.693	Residential	suburban	unfed	ND	Aedes	aegypti
CMS002_045a_Rb_S183_L004	CMS002_045a	Aedes	albopictus	NA	2017-10-24	EVS	WVAL	34.1519	-117.663	Residential	suburban	unfed	69.2	Aedes	albopictus
CMS002_045b_Rb_S184_L004	CMS002_045b	Aedes	albopictus	NA	2017-10-24	EVS	WVAL	34.1519	-117.663	Residential	suburban	unfed	16.8	Aedes	albopictus
CMS002_045c_Rb_S185_L004	CMS002_045c	Aedes	albopictus	NA	2017-10-24	EVS	WVAL	34.1519	-117.663	Residential	suburban	unfed	ND	Aedes	albopictus
CMS002_045d_Rb_S186_L004	CMS002_045d	Aedes	albopictus	NA	2017-10-24	EVS	WVAL	34.1519	-117.663	Residential	suburban	unfed	26.96	Aedes	albopictus
CMS002_045e_Rb_S188_L004	CMS002_045e	Aedes	albopictus	NA	2017-10-24	EVS	WVAL	34.1519	-117.663	Residential	suburban	unfed	ND	Aedes	albopictus
CMS002_045f_Rb_S189_L004	CMS002_045f	Aedes	albopictus	NA	2017-10-24	EVS	WVAL	34.1519	-117.663	Residential	suburban	unfed	ND	Aedes	albopictus
CMS002_045g_Rb_S190_L004	CMS002_045g	Aedes	albopictus	NA	2017-10-24	EVS	WVAL	34.1519	-117.663	Residential	suburban	unfed	21.6	Aedes	albopictus
CMS002_046a_Rb_S191_L004	CMS002_046a	Culex	quinquefasciatus	NA	2017-11-29	OVI	WVAL	33.9725	-117.714	Residential	suburban	unfed	88.8	Culex	quinquefasciatus
CMS002_046b_Rb_S192_L004	CMS002_046b	Culex	quinquefasciatus	NA	2017-11-29	OVI	WVAL	33.9725	-117.714	Residential	suburban	unfed	88.8	Culex	quinquefasciatus
CMS002_047a_Rb_S193_L004	CMS002_047a	Culex	erythrothorax	NA	2017-11-29	EVS	WVAL	33.9378	-117.633	Marsh/Swamp	rural	unfed	70.8	Culex	erythrothorax
CMS002_047b_Rb_S194_L004	CMS002_047b	Culex	erythrothorax	NA	2017-11-29	EVS	WVAL	33.9378	-117.633	Marsh/Swamp	rural	unfed	ND	Culex	erythrothorax
CMS002_047c_Rb_S195_L004	CMS002_047c	Culex	erythrothorax	NA	2017-11-29	EVS	WVAL	33.9378	-117.633	Marsh/Swamp	rural	unfed	37.04	Culex	erythrothorax
CMS002_047d_Rb_S196_L004	CMS002_047d	Culex	erythrothorax	NA	2017-11-29	EVS	WVAL	33.9378	-117.633	Marsh/Swamp	rural	unfed	53.6	Culex	erythrothorax
CMS002_047e_Rb_S197_L004	CMS002_047e	Culex	erythrothorax	NA	2017-11-29	EVS	WVAL	33.9378	-117.633	Marsh/Swamp	rural	unfed	78.4	Culex	erythrothorax
CMS002_047f_Rb_S198_L004	CMS002_047f	Culex	erythrothorax	NA	2017-11-29	EVS	WVAL	33.9378	-117.633	Marsh/Swamp	rural	unfed	39.52	Culex	erythrothorax
CMS002_047g_Rb_S200_L004	CMS002_047g	Culex	erythrothorax	NA	2017-11-29	EVS	WVAL	33.9378	-117.633	Marsh/Swamp	rural	unfed	40	Culex	erythrothorax
CMS002_047h_Rb_S1_L004	CMS002_047h	Culex	erythrothorax	NA	2017-11-29	EVS	WVAL	33.9378	-117.633	Marsh/Swamp	rural	unfed	65.2	Culex	erythrothorax
CMS002_047i_Rb_S2_L004	CMS002_047i	Culex	erythrothorax	NA	2017-11-29	EVS	WVAL	33.9378	-117.633	Marsh/Swamp	rural	unfed	94.4	Culex	erythrothorax
CMS002_047j_Rb_S3_L004	CMS002_047j	Culex	erythrothorax	NA	2017-11-29	EVS	WVAL	33.9378	-117.633	Marsh/Swamp	rural	unfed	48.4	Culex	erythrothorax
CMS002_049a_Rb_S4_L004	CMS002_049a	Culex	pipiens	NA	2017-11-21	FAY	PLCR	38.7399	-121.306	Commercial/Industrial/Transportation	suburban	unfed	78.8	Culex	pipiens
CMS002_050a_Rb_S5_L004	CMS002_050a	Culex	pipiens	NA	2017-11-21	FAY	PLCR	38.8243	-121.257	Residential	suburban	unfed	326.4	Culex	pipiens
CMS002_051a_Rb_S6_L004	CMS002_051a	Culex	pipiens	NA	2017-11-21	FAY	PLCR	38.8976	-121.312	Commercial/Industrial/Transportation	suburban	unfed	199.2	Culex	pipiens
CMS002_053a_Rb_S7_L004	CMS002_053a	Culex	erythrothorax	NA	2017-11-21	FAY	PLCR	38.8368	-121.391	Agriculture	rural	unfed	19.9	Culex	pipiens
CMS002_054a_Rb_S8_L004	CMS002_054a	Culex	pipiens	NA	2017-11-21	FAY	PLCR	38.7722	-121.469	Agriculture	rural	unfed	168.8	Culex	pipiens
CMS002_056a_Rb_S9_L004	CMS002_056a	Culex	tarsalis	NA	2017-11-28	FAY	PLCR	38.7872	-121.373	Residential	rural	unfed	ND	Culex	tarsalis
CMS002_057a_Rb_S10_L004	CMS002_057a	Culex	pipiens	NA	2017-11-28	EVS	PLCR	38.7872	-121.373	Residential	rural	unfed	47.2	Culex	pipiens
Table S1 abbreviations and footnotes
NA = not available
ND = not detectable
*genus and species call used for study based on whole transcriptome analysis
æ**sex and bloodfed status based on visual call from collection agency
ÊTrap type abbreviations: AGO=CDC autocidal gravid ovitrap; BG=BG sentinel; EVS=encephalitis virus surveillance; FAY=Fay-Prince carbon dioxide baited; Gravid =CDC gravid trap; OVI=ovitrap
ÊÊCounty abbreviations: ALCO=Alameda, SAND=San Diego, WVAL=West Valley,COAV=Coachella Valley, PLCR=Placer
ˆHabitat type and Population information pulled from California Vectorborne Disease Surveillance System (CalSurv) data for each trap site
