# Supplementary material for: Single mosquito metatranscriptomics identifies vectors, emerging pathogens and reservoirs in one assay
Source: eLife. 2021 Apr 27;10:e68353. doi: 10.7554/eLife.68353 (PMC8110308; doi:10.7554/eLife.68353)
Supplement: Figure 1—source data 2. [file elife-68353-fig1-data2.xlsx]

## Sheet: CMS_TableS2_SequencingStats.csv
sequence_id	sample_id	total_reads	reads_after_star	reads_after_trimmomatic	reads_after_priceseq_quality_filtering	reads_after_cdhitdup	non_host_reads†	nonhost_reads_percent‡	quality_control_percent*	compression_ratio**	total_ercc_reads	sra_biosample_accession
CMS001_001_Ra_S1	CMS001_001	26717044	3028634	1580616	1379676	1053806	687714	2.574	45.554	1.31	6104	SAMN14051441
CMS001_002_Ra_S1	CMS001_002	31503742	1338930	882614	642770	514296	369628	1.173	48.006	1.25	3080	SAMN14051442
CMS001_003_Ra_S2	CMS001_003	27436684	3715710	2073198	1875668	911952	279064	1.017	50.479	2.06	2214	SAMN14051443
CMS001_004_Ra_S2	CMS001_004	35584846	727462	249176	115692	98042	46660	0.131	15.904	1.18	2586	SAMN14051444
CMS001_005_Ra_S3	CMS001_005	36030436	6509070	2723356	2458870	1186752	414060	1.149	37.776	2.07	2862	SAMN14051445
CMS001_006_Ra_S5	CMS001_006	31771554	758492	490004	429804	308680	114312	0.36	56.666	1.39	6042	SAMN14051446
CMS001_007_Ra_S12	CMS001_007	20334238	279696	261996	184656	170328	55328	0.272	66.02	1.08	1314	SAMN14051447
CMS001_008_Ra_S3	CMS001_008	39977532	3976144	2514558	1987246	638770	242172	0.606	49.979	3.11	1790	SAMN14051448
CMS001_009_Ra_S13	CMS001_009	62306790	6919728	6565208	5836158	2559134	813290	1.305	84.341	2.28	2678	SAMN14051449
CMS001_010_Ra_S1	CMS001_010	10956312	269358	173762	91244	88242	31874	0.291	33.875	1.03	5356	SAMN14051450
CMS001_011_Ra_S4	CMS001_011	46367004	2122406	682122	437574	380522	169722	0.366	20.617	1.15	3804	SAMN14051451
CMS001_012_Ra_S4	CMS001_012	29359278	1834658	806152	673056	455274	183896	0.626	36.686	1.48	2540	SAMN14051452
CMS001_013_Ra_S5	CMS001_013	46803120	1044368	565710	322226	304476	109460	0.234	30.854	1.06	10046	SAMN14051453
CMS001_014_Ra_S5	CMS001_014	30285576	4249462	2195844	1960526	819370	189340	0.625	46.136	2.39	1926	SAMN14051454
CMS001_015_Ra_S13	CMS001_015	31961998	997188	275602	129918	118742	53908	0.169	13.028	1.09	2148	SAMN14051455
CMS001_016_Ra_S6	CMS001_016	26878040	3681142	2072740	1869298	960678	314946	1.172	50.78	1.95	1760	SAMN14051456
CMS001_017_Ra_S6	CMS001_017	35183096	649294	473696	410060	294762	111950	0.318	63.155	1.39	3056	SAMN14051457
CMS001_018_Ra_S14	CMS001_018	18795122	399074	225100	158280	148500	65880	0.351	39.662	1.07	1206	SAMN14051458
CMS001_019_Ra_S14	CMS001_019	31633394	714076	328958	171190	150862	77522	0.245	23.974	1.13	1892	SAMN14051459
CMS001_020_Ra_S15	CMS001_020	31195308	1249188	988750	697900	611540	396026	1.27	55.868	1.14	4426	SAMN14051460
CMS001_021_Ra_S16	CMS001_021	30799178	1278536	793236	553140	529622	259392	0.842	43.264	1.04	4756	SAMN14051461
CMS001_022_Ra_S6	CMS001_022	46009226	1423394	614140	391010	307450	177872	0.387	27.47	1.27	9752	SAMN14051462
CMS001_023_Ra_S17	CMS001_023	29556020	871036	317028	169646	155602	67972	0.23	19.476	1.09	1872	SAMN14051463
CMS001_024_Ra_S15	CMS001_024	21483528	340504	320980	237818	216604	85546	0.398	69.843	1.1	2110	SAMN14051464
CMS001_025_Ra_S7	CMS001_025	38525702	4374192	2855854	2376784	726112	272530	0.707	54.337	3.27	1794	SAMN14051465
CMS001_026_Ra_S18	CMS001_026	44577072	5232080	3223898	2640146	833132	326078	0.731	50.461	3.17	2666	SAMN14051466
CMS001_027_Ra_S16	CMS001_027	29422908	520728	469796	343304	280598	80376	0.273	65.928	1.22	452	SAMN14051467
CMS001_028_Ra_S17	CMS001_028	13579216	354994	300658	235218	223598	97818	0.72	66.26	1.05	1384	SAMN14051468
CMS001_029_Ra_S18	CMS001_029	18413176	599274	304026	232726	176872	89566	0.486	38.835	1.32	304	SAMN14051469
CMS001_030_Ra_S7	CMS001_030	32798496	1165758	273410	176854	145002	69840	0.213	15.171	1.22	2094	SAMN14051470
CMS001_031_Ra_S19	CMS001_031	13525892	434798	422248	333440	306578	109616	0.81	76.688	1.09	2016	SAMN14051471
CMS001_032_Ra_S7	CMS001_032	36829212	622960	419378	356330	209110	93508	0.254	57.199	1.7	2468	SAMN14051472
CMS001_033_Ra_S8	CMS001_033	31711470	1275898	610930	391420	360682	185802	0.586	30.678	1.09	7106	SAMN14051473
CMS001_034_Ra_S19	CMS001_034	25525650	1116960	357642	226908	210320	114330	0.448	20.315	1.08	1250	SAMN14051474
CMS001_035_Ra_S20	CMS001_035	13364956	1031778	1021668	855528	625998	373770	2.797	82.918	1.37	1540	SAMN14051475
CMS001_036_Ra_S20	CMS001_036	28785710	1636088	1020746	697322	634462	275388	0.957	42.621	1.1	10062	SAMN14051476
CMS001_037_Ra_S21	CMS001_037	47742618	1098996	542464	314232	273882	112490	0.236	28.593	1.15	4170	SAMN14051477
CMS001_038_Ra_S22	CMS001_038	36067908	823626	419790	267576	238264	132206	0.367	32.488	1.12	3244	SAMN14051478
CMS001_039_Ra_S9	CMS001_039	34687168	812840	409642	245672	214764	112376	0.324	30.224	1.14	2012	SAMN14051479
CMS001_040_Ra_S21	CMS001_040	15491978	258770	245672	171054	159370	70502	0.455	66.103	1.07	2790	SAMN14051480
CMS001_041_Ra_S10	CMS001_041	35752378	761662	431464	268802	206818	102676	0.287	35.292	1.3	4474	SAMN14051481
CMS001_042_Ra_S23	CMS001_042	36384680	1090294	519106	320336	289568	138728	0.381	29.381	1.11	2058	SAMN14051482
CMS001_043_Ra_S24	CMS001_043	20543860	649692	361758	240368	212088	84360	0.411	36.997	1.13	1502	SAMN14051483
CMS001_044_Ra_S25	CMS001_044	11465786	197716	164290	100700	91880	65128	0.568	50.932	1.1	836	SAMN14051484
CMS001_045_Ra_S2	CMS001_045	10869462	475092	351174	239812	215716	135680	1.248	50.477	1.11	14114	SAMN14051485
CMS001_046_Ra_S3	CMS001_046	15574872	1222150	889394	608492	458604	384232	2.467	49.789	1.33	3376	SAMN14051486
CMS001_047_Ra_S4	CMS001_047	11122662	584456	354058	217998	192178	104044	0.935	37.299	1.13	1142	SAMN14051487
CMS001_048_Ra_S5	CMS001_048	11602996	380140	221132	120664	114636	46294	0.399	31.742	1.05	2754	SAMN14051488
CMS001_049_Ra_S6	CMS001_049	13208840	613080	202046	132350	124194	67518	0.511	21.588	1.07	1360	SAMN14051489
CMS001_050_Ra_S23	CMS001_050	24841430	599314	483296	359276	327176	112662	0.454	59.948	1.1	1008	SAMN14051490
CMS001_051_Ra_S8	CMS001_051	30339330	1722222	597694	474592	416264	207714	0.685	27.557	1.14	1574	SAMN14051491
CMS001_052_Ra_S7	CMS001_052	15587242	673796	236456	123418	114522	46936	0.301	18.317	1.08	1066	SAMN14051492
CMS001_053_Ra_S8	CMS001_053	18426770	727182	242080	121922	113404	47824	0.26	16.766	1.08	946	SAMN14051493
CMS001_054_Ra_S11	CMS001_054	34981460	579632	256280	124662	96952	40758	0.117	21.507	1.29	3636	SAMN14051494
CMS001_055_Ra_S9	CMS001_055	15309036	475426	198772	94778	91766	29778	0.195	19.935	1.03	2454	SAMN14051495
CMS001_056_Ra_S10	CMS001_056	16171702	407424	210082	103940	97822	40488	0.25	25.512	1.06	2180	SAMN14051496
CMS001_057_Ra_S11	CMS001_057	16068996	971124	736728	460498	378974	181904	1.132	47.419	1.22	3442	SAMN14051497
CMS001_058_Ra_S9	CMS001_058	23464710	1416994	431606	331464	301104	116416	0.496	23.392	1.1	2310	SAMN14051498
CMS001_059_Ra_S10	CMS001_059	28157612	1468576	318112	229594	193404	99862	0.355	15.634	1.19	4634	SAMN14051499
CMS001_060_Ra_S12	CMS001_060	41239958	4167278	3089046	2549724	1078646	504880	1.224	61.184	2.36	2998	SAMN14051500
CMS001_water1_S11	CMS001_water1_control	9186	8798	128	34	26	6	0.065	0.386	1.31	214	SAMN14051589
CMS001_water2_S24	CMS001_water2_control	464240	22694	17912	6830	6654	3994	0.86	30.096	1.03	431350	SAMN14051590
CMS001_water3_Qiagen_S26	CMS001_water3_control	8462350	567548	344014	273416	184472	78068	0.923	48.175	1.48	204484	SAMN14051591
CMS001_water4_Zymo_S27	CMS001_water4_control	1069066	184186	35826	24510	19408	9400	0.879	13.307	1.26	873754	SAMN14051592
CMS001_water5_RNA_A_S12	CMS001_water5_control	31114	17376	798	446	434	184	0.591	2.567	1.03	13204	SAMN14051593
CMS002_001a_Rb_S116_L004	CMS002_001a	54921592	2236222	417442	331392	175472	82762	0.151	14.819	1.89	7932	SAMN14051501
CMS002_004a_Rb_S117_L004	CMS002_004a	54382586	2842566	233864	162796	75224	13812	0.025	5.727	2.16	7214	SAMN14051502
CMS002_007a_Rb_S118_L004	CMS002_007a	91089974	8559214	5358866	5068802	1481196	717738	0.788	59.22	3.42	21520	SAMN14051503
CMS002_010a_Rb_S119_L004	CMS002_010a	89358216	2467114	419966	288338	121934	33756	0.038	11.687	2.36	5540	SAMN14051504
CMS002_013a_Rb_S120_L004	CMS002_013a	76144326	1310950	532890	402562	223824	68442	0.09	30.708	1.8	45442	SAMN14051505
CMS002_016a_Rb_S121_L004	CMS002_016a	81220802	2301612	147596	55288	41652	1342	0.002	2.402	1.33	12820	SAMN14051506
CMS002_017a_Rb_S122_L004	CMS002_017a	75330508	2239502	366802	280058	188266	151912	0.202	12.505	1.49	24734	SAMN14051507
CMS002_017b_Rb_S123_L004	CMS002_017b	77087486	1298358	401866	317564	210186	172502	0.224	24.459	1.51	27258	SAMN14051508
CMS002_017c_Rb_S124_L004	CMS002_017c	66242378	1136076	372134	294274	193982	162094	0.245	25.903	1.52	59528	SAMN14051509
CMS002_017d_Rb_S125_L004	CMS002_017d	50709076	990226	501732	436486	319496	263722	0.52	44.079	1.37	16458	SAMN14051510
CMS002_017e_Rb_S126_L004	CMS002_017e	61930896	1616844	141158	72258	54416	13054	0.021	4.469	1.33	21374	SAMN14051511
CMS002_018a_Rb_S128_L004	CMS002_018a	53659794	3229272	139632	78316	57464	32974	0.061	2.425	1.36	2396	SAMN14051512
CMS002_018b_Rb_S129_L004	CMS002_018b	89837146	1741420	584482	466892	271670	219176	0.244	26.811	1.72	80804	SAMN14051513
CMS002_019a_Rb_S130_L004	CMS002_019a	71919820	1474856	543112	451052	253658	210562	0.293	30.583	1.78	50604	SAMN14051514
CMS002_020a_Rb_S131_L004	CMS002_020a	66177444	5074548	2642760	2466912	1169676	744862	1.126	48.613	2.11	13426	SAMN14051515
CMS002_020b_Rb_S132_L004	CMS002_020b	119173142	7133260	2952602	2723534	555316	264600	0.222	38.181	4.9	12138	SAMN14051516
CMS002_020c_Rb_S133_L004	CMS002_020c	126641370	10918848	3603356	3358044	657884	322644	0.255	30.755	5.1	26980	SAMN14051517
CMS002_020d_Rb_S134_L004	CMS002_020d	31922362	2441152	932150	871224	317880	158114	0.495	35.689	2.74	2984	SAMN14051518
CMS002_020e_Rb_S135_L004	CMS002_020e	74164868	4646676	2810024	2596502	775940	436078	0.588	55.879	3.35	22170	SAMN14051519
CMS002_021a_Rb_S136_L004	CMS002_021a	94039124	7832544	5081574	4777128	1920014	1100040	1.17	60.991	2.49	8050	SAMN14051520
CMS002_022a_Rb_S137_L004	CMS002_022a	94157694	3082930	540948	397826	193780	91574	0.097	12.904	2.05	15692	SAMN14051521
CMS002_023a_Rb_S138_L004	CMS002_023a	54787968	1226314	364072	277210	172142	103350	0.189	22.605	1.61	21486	SAMN14051522
CMS002_025a_Rb_S140_L004	CMS002_025a	18885656	114064	95888	42676	32600	2188	0.012	37.414	1.31	80464	SAMN14051523
CMS002_025b_Rb_S141_L004	CMS002_025b	25645770	100050	65050	28396	22110	1006	0.004	28.382	1.28	130776	SAMN14051524
CMS002_025c_Rb_S142_L004	CMS002_025c	85740778	1104318	191938	80484	57650	1930	0.002	7.288	1.4	94	SAMN14051525
CMS002_025d_Rb_S143_L004	CMS002_025d	35087042	398430	68838	28744	21488	858	0.002	7.214	1.34	44038	SAMN14051526
CMS002_025e_Rb_S144_L004	CMS002_025e	88720312	1480276	201976	84912	60730	4848	0.005	5.736	1.4	96904	SAMN14051527
CMS002_025f_Rb_S145_L004	CMS002_025f	78690306	904674	134310	53188	36326	618	0.001	5.879	1.46	5366	SAMN14051528
CMS002_026a_Rb_S146_L004	CMS002_026a	37269798	689084	329464	278812	105834	11688	0.031	40.461	2.63	29134	SAMN14051529
CMS002_026b_Rb_S147_L004	CMS002_026b	56506648	1316294	525416	436936	148586	18398	0.033	33.194	2.94	43114	SAMN14051530
CMS002_026c_Rb_S148_L004	CMS002_026c	60679324	1207192	524774	442236	163860	25302	0.042	36.633	2.7	80830	SAMN14051531
CMS002_026d_Rb_S149_L004	CMS002_026d	96884414	2542604	749438	638714	204514	44056	0.045	25.12	3.12	16830	SAMN14051532
CMS002_026e_Rb_S150_L004	CMS002_026e	61840756	1235966	441444	366172	131142	19820	0.032	29.626	2.79	99524	SAMN14051533
CMS002_027a_Rb_S152_L004	CMS002_027a	37243342	2552586	225434	160298	86606	33744	0.091	6.28	1.85	2060	SAMN14051534
CMS002_027b_Rb_S153_L004	CMS002_027b	83431474	3696024	965660	818350	391220	183742	0.22	22.141	2.09	8096	SAMN14051535
CMS002_028a_Rb_S154_L004	CMS002_028a	78859068	3087810	1078022	916348	405424	115070	0.146	29.676	2.26	16582	SAMN14051536
CMS002_028b_Rb_S155_L004	CMS002_028b	109203686	3664718	1610618	1379142	472266	137308	0.126	37.633	2.92	24236	SAMN14051537
CMS002_028c_Rb_S156_L004	CMS002_028c	91267932	5036320	1264644	1089072	455588	125498	0.138	21.624	2.39	25946	SAMN14051538
CMS002_028d_Rb_S157_L004	CMS002_028d	97823918	5077446	1297372	1085922	475200	167862	0.172	21.387	2.29	24772	SAMN14051539
CMS002_028e_Rb_S158_L004	CMS002_028e	124739806	6800424	3020410	2714518	1212208	676476	0.542	39.917	2.24	36290	SAMN14051540
CMS002_029a_Rb_S159_L004	CMS002_029a	93293792	6359732	1598610	1413374	807302	309430	0.332	22.224	1.75	12848	SAMN14051541
CMS002_029b_Rb_S160_L004	CMS002_029b	85392072	3073400	1140534	970132	475924	182846	0.214	31.565	2.04	8450	SAMN14051542
CMS002_029c_Rb_S161_L004	CMS002_029c	93413514	7346570	1291068	1122060	495746	194790	0.209	15.273	2.26	4918	SAMN14051543
CMS002_029d_Rb_S162_L004	CMS002_029d	78476036	6380386	1339866	1181386	642726	300516	0.383	18.516	1.84	6896	SAMN14051544
CMS002_029e_Rb_S164_L004	CMS002_029e	25660162	791318	664806	550962	366224	193732	0.755	69.626	1.5	14406	SAMN14051545
CMS002_031a_Rb_S165_L004	CMS002_031a	46150948	2089658	1058504	930894	571478	286630	0.621	44.548	1.63	61106	SAMN14051546
CMS002_032a_Rb_S166_L004	CMS002_032a	63556578	2543650	1672118	1505626	997014	495598	0.78	59.192	1.51	78602	SAMN14051547
CMS002_033a_Rb_S167_L004	CMS002_033a	71357226	3101982	1675092	1514862	883790	422242	0.592	48.835	1.71	31584	SAMN14051548
CMS002_034a_Rb_S168_L004	CMS002_034a	38621804	1679090	577326	494530	293132	148282	0.384	29.452	1.69	24106	SAMN14051549
CMS002_035a_Rb_S169_L004	CMS002_035a	73951030	3458628	2030434	1821356	1120396	626816	0.848	52.661	1.63	66950	SAMN14051550
CMS002_036a_Rb_S170_L004	CMS002_036a	37781352	1107582	921614	815508	528512	280752	0.743	73.63	1.54	86656	SAMN14051551
CMS002_037a_Rb_S171_L004	CMS002_037a	97570774	7469552	1517868	1330220	643100	303764	0.311	17.809	2.07	17294	SAMN14051552
CMS002_038a_Rb_S172_L004	CMS002_038a	92324952	5320566	1955212	1748934	977222	478196	0.518	32.871	1.79	43950	SAMN14051553
CMS002_039a_Rb_S173_L004	CMS002_039a	75161228	2518304	1433508	1261046	753768	336788	0.448	50.075	1.67	47320	SAMN14051554
CMS002_040a_Rb_S174_L004	CMS002_040a	65632852	2287848	1354008	1203286	699932	348576	0.531	52.595	1.72	68298	SAMN14051555
CMS002_041a_Rb_S176_L004	CMS002_041a	49581704	1603944	837320	734174	428756	200106	0.404	45.773	1.71	48380	SAMN14051556
CMS002_042a_Rb_S177_L004	CMS002_042a	34365364	789170	705188	556934	332300	72474	0.211	70.572	1.68	13178	SAMN14051557
CMS002_044a_Rb_S178_L004	CMS002_044a	51576844	673752	143434	71780	53184	3738	0.007	10.654	1.35	24708	SAMN14051558
CMS002_044b_Rb_S179_L004	CMS002_044b	38526446	219482	144634	61378	47218	1582	0.004	27.965	1.3	56828	SAMN14051559
CMS002_044c_Rb_S180_L004	CMS002_044c	93622432	1766878	201462	81602	59250	2034	0.002	4.618	1.38	24652	SAMN14051560
CMS002_044d_Rb_S181_L004	CMS002_044d	111230412	1976792	223886	104202	65066	6034	0.005	5.271	1.6	66578	SAMN14051561
CMS002_044e_Rb_S182_L004	CMS002_044e	50807004	303726	212690	117466	69234	4226	0.008	38.675	1.7	165276	SAMN14051562
CMS002_045a_Rb_S183_L004	CMS002_045a	88956902	4667078	638842	539630	170086	35756	0.04	11.562	3.17	21398	SAMN14051563
CMS002_045b_Rb_S184_L004	CMS002_045b	62566848	1270876	635934	536712	194162	45804	0.073	42.232	2.76	92990	SAMN14051564
CMS002_045c_Rb_S185_L004	CMS002_045c	53689962	1051602	1044898	883996	268608	105124	0.196	84.062	3.29	346240	SAMN14051565
CMS002_045d_Rb_S186_L004	CMS002_045d	54817098	1624758	793070	693786	310588	181534	0.331	42.701	2.23	49364	SAMN14051566
CMS002_045e_Rb_S188_L004	CMS002_045e	44910420	1299954	1247718	1097492	418656	242958	0.541	84.425	2.62	83058	SAMN14051567
CMS002_045f_Rb_S189_L004	CMS002_045f	34302400	613190	572686	486598	152644	21838	0.064	79.355	3.19	83472	SAMN14051568
CMS002_045g_Rb_S190_L004	CMS002_045g	43011038	976714	912324	787138	283182	98364	0.229	80.59	2.78	59586	SAMN14051569
CMS002_046a_Rb_S191_L004	CMS002_046a	99761686	4225200	599872	452710	226804	89374	0.09	10.715	2	15644	SAMN14051570
CMS002_046b_Rb_S192_L004	CMS002_046b	86797744	1906842	546854	420514	221492	99992	0.115	22.053	1.9	15900	SAMN14051571
CMS002_047a_Rb_S193_L004	CMS002_047a	75891160	3271492	1080550	937792	448348	145250	0.191	28.666	2.09	15406	SAMN14051572
CMS002_047b_Rb_S194_L004	CMS002_047b	35774292	597236	513564	397092	223508	66854	0.187	66.488	1.78	58352	SAMN14051573
CMS002_047c_Rb_S195_L004	CMS002_047c	76639662	2953510	1178992	998630	536164	150590	0.196	33.812	1.86	30186	SAMN14051574
CMS002_047d_Rb_S196_L004	CMS002_047d	84501126	2604748	1411248	1225778	586232	202738	0.24	47.059	2.09	31214	SAMN14051575
CMS002_047e_Rb_S197_L004	CMS002_047e	77821980	2774442	1293914	1101888	515894	185822	0.239	39.716	2.14	8952	SAMN14051576
CMS002_047f_Rb_S198_L004	CMS002_047f	55260394	2495098	839650	726714	392928	137186	0.248	29.126	1.85	26166	SAMN14051577
CMS002_047g_Rb_S200_L004	CMS002_047g	32029932	1737452	700250	596838	310634	134566	0.42	34.351	1.92	9966	SAMN14051578
CMS002_047h_Rb_S1_L004	CMS002_047h	54254598	1871626	820616	711264	342088	103446	0.191	38.002	2.08	17440	SAMN14051579
CMS002_047i_Rb_S2_L004	CMS002_047i	54727762	2520582	763692	655674	329466	107640	0.197	26.013	1.99	8140	SAMN14051580
CMS002_047j_Rb_S3_L004	CMS002_047j	66671224	2111290	1012808	852512	440284	149082	0.224	40.379	1.94	31550	SAMN14051581
CMS002_049a_Rb_S4_L004	CMS002_049a	55951408	1317142	383708	297494	185338	83096	0.149	22.586	1.61	27144	SAMN14051582
CMS002_050a_Rb_S5_L004	CMS002_050a	40223370	1252370	190188	144282	48394	4052	0.01	11.521	2.98	1608	SAMN14051583
CMS002_051a_Rb_S6_L004	CMS002_051a	81237864	2572624	773230	655694	259870	139988	0.172	25.487	2.52	5968	SAMN14051584
CMS002_053a_Rb_S7_L004	CMS002_053a	150000000	9045514	4437508	4083412	2265776	1233696	0.822	45.143	1.8	48218	SAMN14051585
CMS002_054a_Rb_S8_L004	CMS002_054a	75446550	685266	564090	340666	216808	85110	0.113	49.713	1.57	7692	SAMN14051586
CMS002_056a_Rb_S9_L004	CMS002_056a	38502368	1675598	1172408	1063150	660646	417130	1.083	63.449	1.61	69908	SAMN14051587
CMS002_057a_Rb_S10_L004	CMS002_057a	52687788	1750014	459372	364272	146424	53942	0.102	20.815	2.49	18342	SAMN14051588
CMS002_Water1_Rb_S127_L004	CMS002_water1_control	247124	60282	6910	5814	4360	1400	0.567	9.645	1.33	175282	SAMN14051594
CMS002_Water2_Rb_S139_L004	CMS002_water2_control	190334	40786	4944	4110	3278	1274	0.669	10.077	1.25	141826	SAMN14051595
CMS002_Water3_Rb_S151_L004	CMS002_water3_control	175490	30610	4468	3670	3000	1400	0.798	11.99	1.22	137646	SAMN14051596
CMS002_Water4_Rb_S163_L004	CMS002_water4_control	168186	33764	5826	4860	3822	1734	1.031	14.394	1.27	124906	SAMN14051597
CMS002_Water5_Rb_S175_L004	CMS002_water5_control	273804	69998	8350	7130	5294	1842	0.673	10.186	1.35	192392	SAMN14051598
CMS002_Water6_Rb_S187_L004	CMS002_water6_control	51178	10668	1812	1530	1272	552	1.079	14.342	1.2	37232	SAMN14051599
CMS002_Water7_Rb_S199_L004	CMS002_water7_control	184738	37468	4596	3724	3002	1340	0.725	9.939	1.24	137964	SAMN14051600
CMS002_Water8_Rb_S11_L004	CMS002_water8_control	4534	1204	166	154	142	64	1.412	12.791	1.08	2992	SAMN14051601
	Total	7684079092	325227330	140116392	117402756	58923716	26764456	na	na	na	3609098
	Average	5.22726e+07	2.21243e+06	953173	798658	400842	182071	0.424918	36.6906	1.79245	37827.8
	Min	10869462	100050	65050	28396	21488	618	0.001	2.402	1.03	94
	Max	150000000	10918848	6565208	5836158	2559134	1233696	2.797	84.425	5.1	873754
	*quality_control_percent = (reads_after_priceseq/reads_after_star)*100
	**compression ratio = (reads_after_priceseq/reads_after_cdhit_dup)
	†non_host_reads = (reads_after_cdhit_dup - (number of reads aligning to host via bowtie2 + number of reads with lzw compression/length < 0.45)
	‡non_host_percent = (non_host_reads/total_reads)*100
	na = not appplicable
