# Supplementary material for: Single mosquito metatranscriptomics identifies vectors, emerging pathogens and reservoirs in one assay
Source: eLife. 2021 Apr 27;10:e68353. doi: 10.7554/eLife.68353 (PMC8110308; doi:10.7554/eLife.68353)
Supplement: Figure 5—source data 1. [file elife-68353-fig5-data1.csv]

Sample	Bloodmeal Category	Bloodmeal Call	Habitat	Lat	Long	Genus	Species
CMS001_001_Ra_S1	Pecora	Pecora	Marsh / Wildlife Refuge / Park	37.55697	-122.07938	Culex	erythrothorax
CMS001_003_Ra_S2	Pecora	Pecora	Marsh / Wildlife Refuge / Park	37.55697	-122.07938	Culiseta	particeps
CMS001_004_Ra_S2	Carnivora	Caniformia	Industrial (waste water treatment plant)	37.7152	-122.19431000000002	Culex	pipiens
CMS001_008_Ra_S3	Pecora	Pecora	Marsh / Wildlife Refuge / Park	37.55697	-122.07938	Culiseta	particeps
CMS001_009_Ra_S13	Pecora	Pecora	Marsh / Wildlife Refuge / Park	37.55697	-122.07938	Culiseta	particeps
CMS001_010_Ra_S1	Pecora	Pecora	Marsh / Wildlife Refuge / Park	37.55697	-122.07938	Culex	erythrothorax
CMS001_011_Ra_S4	Rodentia	Muroidea	Marsh / Wildlife Refuge / Park	37.55697	-122.07938	Culex	erythrothorax
CMS001_012_Ra_S4	Pecora	Pecora	Marsh / Wildlife Refuge / Park	37.55697	-122.07938	Aedes	dorsalis
CMS001_013_Ra_S5	Leporidae	Leporidae	Marsh / Wildlife Refuge / Park	37.55697	-122.07938	Culex	erythrothorax
CMS001_015_Ra_S13	Pecora	Pecora	Marsh / Wildlife Refuge / Park	37.55697	-122.07938	Culex	erythrothorax
CMS001_016_Ra_S6	Pecora	Pecora	Marsh	37.58191	-122.04846	Culiseta	inornata
CMS001_018_Ra_S14	Pecora	Pecora	Marsh / Wildlife Refuge / Park	37.55697	-122.07938	Culex	erythrothorax
CMS001_019_Ra_S14	Carnivora	Carnivora	Marsh / Wildlife Refuge / Park	37.55697	-122.07938	Culex	erythrothorax
CMS001_020_Ra_S15	Leporidae	Leporidae	Marsh	37.58191	-122.04846	Culex	erythrothorax
CMS001_022_Ra_S6	Pecora	Pecora	Marsh / Wildlife Refuge / Park	37.55697	-122.07938	Culex	erythrothorax
CMS001_023_Ra_S17	Aves	Anas platyrhynchos	Marsh	37.58191	-122.04838000000001	Culex	erythrothorax
CMS001_025_Ra_S7	Pecora	Odocoileus hemionus hemionus	Marsh / Wildlife Refuge / Park	37.55697	-122.07938	Culiseta	particeps
CMS001_027_Ra_S16	Aves	Passeriformes	Park / Undeveloped	37.8665	-122.31051000000001	Culex	tarsalis
CMS001_028_Ra_S17	Carnivora	Caniformia	Industrial (waste water treatment plant)	37.7152	-122.19431000000002	Culex	tarsalis
CMS001_029_Ra_S18	Aves	Passeriformes	Park / adjacent to Industrial (waste water treatment plant)	37.68473	-121.91341000000001	Culex	pipiens
CMS001_030_Ra_S7	Carnivora	Caniformia	Industrial (waste water treatment plant)	37.7152	-122.19431000000002	Culex	pipiens
CMS001_031_Ra_S19	Carnivora	Procyon lotor	Park	37.8063	-122.2573	Culex	tarsalis
CMS001_032_Ra_S7	Aves	Passeriformes	Golf Course	37.66126	-122.13335	Culex	tarsalis
CMS001_033_Ra_S8	Aves	Gallus gallus	Marsh / Wildlife Refuge / Park	37.55697	-122.07938	Culex	tarsalis
CMS001_035_Ra_S20	Pecora	Pecora	Marsh / Wildlife Refuge / Park	37.55697	-122.07938	Culex	erythrothorax
CMS001_036_Ra_S20	Pecora	Pecora	Marsh / Wildlife Refuge / Park	37.55697	-122.07938	Culex	tarsalis
CMS001_037_Ra_S21	Aves	Porzana carolina	Marsh / Wildlife Refuge / Park	37.55697	-122.07938	Culex	erythrothorax
CMS001_038_Ra_S22	Pecora	Pecora	Marsh	37.583909999999996	-122.09238	Culex	tarsalis
CMS001_040_Ra_S21	Aves	Haemorhous mexicanus	Undeveloped	37.49949	-121.93378	Culex	pipiens
CMS001_041_Ra_S10	Rodentia	Sciurini	Undeveloped	37.49949	-121.93378	Culex	pipiens
CMS001_042_Ra_S23	Carnivora	Felis catus	Golf Course	37.66126	-122.13335	Culex	tarsalis
CMS001_043_Ra_S24	Aves	Passeriformes	Golf Course	37.66126	-122.13335	Culex	tarsalis
CMS001_045_Ra_S2	Pecora	Pecora	Marsh / Wildlife Refuge / Park	37.55697	-122.07938	Culex	erythrothorax
CMS001_046_Ra_S3	Pecora	Pecora	Marsh / Wildlife Refuge / Park	37.55697	-122.07938	Culex	tarsalis
CMS001_047_Ra_S4	Aves	Passeriformes	Marsh / Wildlife Refuge / Park	37.55697	-122.07938	Culex	erythrothorax
CMS001_048_Ra_S5	Rodentia	Rattus norvegicus	Marsh / Wildlife Refuge / Park	37.55697	-122.07938	Culex	erythrothorax
CMS001_049_Ra_S6	Rodentia	Rattus norvegicus	Marsh / Wildlife Refuge / Park	37.55697	-122.07938	Culex	erythrothorax
CMS001_050_Ra_S23	Aves	Ardeidae	Marsh	37.50608	-121.99857	Culex	erythrothorax
CMS001_052_Ra_S7	Pecora	Pecora	Marsh / Wildlife Refuge / Park	37.55697	-122.07938	Culex	erythrothorax
CMS001_053_Ra_S8	Pecora	Pecora	Marsh / Wildlife Refuge / Park	37.55697	-122.07938	Culex	erythrothorax
CMS001_054_Ra_S11	Aves	Passeriformes	Marsh / Wildlife Refuge / Park	37.630829999999996	-122.14267	Culex	pipiens
CMS001_057_Ra_S11	Pecora	Pecora	Marsh / Wildlife Refuge / Park	37.55697	-122.07938	Culex	erythrothorax
CMS001_058_Ra_S9	Rodentia	Microtus ochrogaster	Marsh/Swamp	37.556999999999995	-122.0794	Culex	erythrothorax
CMS001_059_Ra_S10	Aves	Passeriformes	Industrial (waste water treatment plant)	37.6683	-122.15915	Culex	pipiens
CMS001_060_Ra_S12	Pecora	Pecora	Marsh / Wildlife Refuge / Park	37.55697	-122.07938	Culiseta	inornata
CMS002_025c_Rb_S142_L004	Rodentia	Mus musculus	Residential	33.954615000000004	-117.693828	Aedes	aegypti
