# Supplementary material for: Single mosquito metatranscriptomics identifies vectors, emerging pathogens and reservoirs in one assay
Source: eLife. 2021 Apr 27;10:e68353. doi: 10.7554/eLife.68353 (PMC8110308; doi:10.7554/eLife.68353)
Supplement: Figure 5—source data 3. [file elife-68353-fig5-data3.xlsx]

## Sheet: Sheet1
Parasite category	Sample	Contig	Top Blastn hit - Accession	Top Blastn hit - Organism	Top Blastn hit - Sample source	Top Blastn hit - Known hosts	Bloodmeal category
Mammalian virus	CMS001_012_Ra_S4	NODE_5_length_3972_cov_22.541463	KF296322.1	Mobuck Virus	Odocoileus virginianus (White-tailed deer)	Deer	Pecora
Mammalian virus	CMS001_012_Ra_S4	NODE_50_length_1597_cov_57.715132	MH801203.1	Mobuck Virus	Odocoileus virginianus (White-tailed deer)	Deer	Pecora
Mammalian virus	CMS001_012_Ra_S4	NODE_155_length_1150_cov_46.415657	KF296328.1	Mobuck Virus	Odocoileus virginianus (White-tailed deer)	Deer	Pecora
Mammalian virus	CMS001_012_Ra_S4	NODE_205_length_1058_cov_45.136595	KF296327.1	Mobuck Virus	Odocoileus virginianus (White-tailed deer)	Deer	Pecora
Mammalian virus	CMS001_012_Ra_S4	NODE_447_length_796_cov_84.671766	KF296331.1	Mobuck Virus	Odocoileus virginianus (White-tailed deer)	Deer	Pecora
Apicomplexa	CMS001_027_Ra_S16	NODE_1485_length_316_cov_0.916318	AY625607.1	Plasmodium cathemerium		Birds	Aves
Apicomplexa	CMS001_035_Ra_S20	NODE_2123_length_334_cov_1.136187	GU593706.1	Eimeria papillata	Gallus gallus (Chicken)	Mice	Pecora
Apicomplexa	CMS001_035_Ra_S20	NODE_4953_length_246_cov_2.100592	XR_003297360.1	Cyclospora cayetanensis	Homo sapiens (Human)	Humans	Pecora
Apicomplexa	CMS001_037_Ra_S21	NODE_1200_length_377_cov_0.760000	KJ767188.1	Eimeria paludosa	Gallinula tenebrosa (Dusky moorhen)		Aves
Apicomplexa	CMS001_040_Ra_S21	NODE_273_length_478_cov_2.199501	KF297603.1	Plasmodium sp. type B3	Pica pica (Eurasian magpie)		Aves
Apicomplexa	CMS001_040_Ra_S21	NODE_305_length_457_cov_4.752632	XR_003699200.1	Plasmodium gallinaceum		Birds	Aves
Apicomplexa	CMS001_040_Ra_S21	NODE_486_length_379_cov_3.980132	LN835300.1	Plasmodium relictum		Birds	Aves
Apicomplexa	CMS001_040_Ra_S21	NODE_99_length_729_cov_3.892638	MK650492.1	Plasmodium relictum	Parus major (Great tit)	Birds	Aves
Apicomplexa	CMS001_058_Ra_S9	NODE_4030_length_266_cov_0.719577	AF245279.1	Theileria youngi	Neotoma fuscipes (Dusky-footed woodrat)		Rodentia
Apicomplexa	CMS001_058_Ra_S9	NODE_6686_length_234_cov_2.012739	MH618774.1	Theileria sp.	Rhipicephalus sanguineus complex (Brown dog tick)		Rodentia
Trypanosomatidae	CMS001_001_Ra_S1	NODE_11084_length_231_cov_1.805195	KF963538.1	Paratrypanosoma confusum	Culex pipiens (Northern house mosquito)	Invertebrates (monoxenous)	Pecora
Trypanosomatidae	CMS001_001_Ra_S1	NODE_4346_length_297_cov_1.372727	KF963538.1	Paratrypanosoma confusum	Culex pipiens (Northern house mosquito)	Invertebrates (monoxenous)	Pecora
Trypanosomatidae	CMS001_001_Ra_S1	NODE_6361_length_264_cov_1.224599	KF963538.1	Paratrypanosoma confusum	Culex pipiens (Northern house mosquito)	Invertebrates (monoxenous)	Pecora
Trypanosomatidae	CMS001_001_Ra_S1	NODE_6916_length_259_cov_1.131868	KF963538.1	Paratrypanosoma confusum	Culex pipiens (Northern house mosquito)	Invertebrates (monoxenous)	Pecora
Trypanosomatidae	CMS001_001_Ra_S1	NODE_8266_length_248_cov_1.257310	KF963538.1	Paratrypanosoma confusum	Culex pipiens (Northern house mosquito)	Invertebrates (monoxenous)	Pecora
Trypanosomatidae	CMS001_001_Ra_S1	NODE_8678_length_245_cov_1.238095	KF963538.1	Paratrypanosoma confusum	Culex pipiens (Northern house mosquito)	Invertebrates (monoxenous)	Pecora
Trypanosomatidae	CMS001_007_Ra_S12	NODE_6_length_2386_cov_114.974015	KF963538.1	Paratrypanosoma confusum	Culex pipiens (Northern house mosquito)	Invertebrates (monoxenous)	Unidentified
Trypanosomatidae	CMS001_011_Ra_S4	NODE_2105_length_313_cov_0.927966	XM_015805759.1	Leptomonas pyrrhocoris	Pyrrhocoris apterus (Firebug)	Invertebrates (monoxenous)	Rodentia
Trypanosomatidae	CMS001_011_Ra_S4	NODE_5661_length_234_cov_1.394904	AF063022.1	Crithidia fasciculata		Invertebrates (monoxenous)	Rodentia
Trypanosomatidae	CMS001_018_Ra_S14	NODE_114_length_745_cov_73.534431	Y00055.1	Crithidia fasciculata		Invertebrates (monoxenous)	Pecora
Trypanosomatidae	CMS001_018_Ra_S14	NODE_16_length_2166_cov_116.892293	JN036654.1	Leptomonas scantii			Pecora
Trypanosomatidae	CMS001_018_Ra_S14	NODE_21_length_1769_cov_98.252364	KT944307.1	Leptomonas seymouri		Invertebrate + opportunisitic in vertebrates	Pecora
Trypanosomatidae	CMS001_018_Ra_S14	NODE_2397_length_232_cov_1.864516	CP040159.1	Leptomonas amazonensis	Homo sapiens (Human)		Pecora
Trypanosomatidae	CMS001_022_Ra_S6	NODE_21_length_1549_cov_150.827446	KF963538.1	Paratrypanosoma confusum	Culex pipiens (Northern house mosquito)	Invertebrates (monoxenous)	Pecora
Trypanosomatidae	CMS001_022_Ra_S6	NODE_679_length_345_cov_1.358209	XM_015800899.1	Leptomonas pyrrhocoris	Pyrrhocoris apterus (Firebug)	Invertebrates (monoxenous)	Pecora
Trypanosomatidae	CMS001_022_Ra_S6	NODE_791_length_320_cov_1.851852	LR697136.1	Leishmania adleri		Mammals, lizards (dixenous)	Pecora
Trypanosomatidae	CMS001_022_Ra_S6	NODE_806_length_317_cov_1.000000	XM_015796546.1	Leptomonas pyrrhocoris	Pyrrhocoris apterus (Firebug)	Invertebrates (monoxenous)	Pecora
Trypanosomatidae	CMS001_022_Ra_S6	NODE_9_length_2312_cov_1769.100671	JN036654.1	Leptomonas scantii			Pecora
Trypanosomatidae	CMS001_022_Ra_S6	NODE_976_length_290_cov_1.023474	XM_015802891.1	Leptomonas pyrrhocoris	Pyrrhocoris apterus (Firebug)	Invertebrates (monoxenous)	Pecora
Trypanosomatidae	CMS001_022_Ra_S6	NODE_1340_length_268_cov_1.513089	XM_015796549.1	Leptomonas pyrrhocoris	Pyrrhocoris apterus (Firebug)	Invertebrates (monoxenous)	Pecora
Trypanosomatidae	CMS001_029_Ra_S18	NODE_114_length_441_cov_2.684066	AB362411.1	Trypanosoma minasense	Saguinus midas (Midas tamarin)	Primates (dixenous)	Aves
Trypanosomatidae	CMS001_029_Ra_S18	NODE_127_length_420_cov_3.358601	AJ223562.1	Trypanosoma bennetti		Birds (dixenous)	Aves
Trypanosomatidae	CMS001_029_Ra_S18	NODE_224_length_351_cov_2.908759	AB362411.1	Trypanosoma minasense	Saguinus midas (Midas tamarin)	Primates (dixenous)	Aves
Trypanosomatidae	CMS001_029_Ra_S18	NODE_245_length_337_cov_2.907692	JN006849.1	Trypanosoma sp. LZ-2011	Accipiter nisus (Eurasian sparrowhawk)		Aves
Trypanosomatidae	CMS001_029_Ra_S18	NODE_52_length_579_cov_1.197211	JF778738.1	Trypanosoma bennetti	Aquila pomarina (Lesser spotted eagle)	Birds (dixenous)	Aves
Trypanosomatidae	CMS001_032_Ra_S7	NODE_114_length_506_cov_2.137529	JN006847.1	Trypanosoma sp. LZ-2011	Turdus sp. (Thrushes)		Aves
Trypanosomatidae	CMS001_032_Ra_S7	NODE_178_length_442_cov_1.857534	AB362411.1	Trypanosoma minasense	Saguinus midas (Midas tamarin)	Primates (dixenous)	Aves
Trypanosomatidae	CMS001_032_Ra_S7	NODE_196_length_427_cov_1.651429	AB362411.1	Trypanosoma minasense	Saguinus midas (Midas tamarin)	Primates (dixenous)	Aves
Trypanosomatidae	CMS001_032_Ra_S7	NODE_311_length_366_cov_1.851211	AJ223562.1	Trypanosoma bennetti		Birds (dixenous)	Aves
Trypanosomatidae	CMS001_032_Ra_S7	NODE_377_length_347_cov_1.892593	AB828157.1	Trypanosoma sp. Coma2	Corvus macrorhynchos (Large-billed crow)		Aves
Trypanosomatidae	CMS001_035_Ra_S20	NODE_1011_length_465_cov_1961.170103	Y00055.1	Crithidia fasciculata		Invertebrates (monoxenous)	Pecora
Trypanosomatidae	CMS001_035_Ra_S20	NODE_1235_length_423_cov_2796.589595	KT944307.1	Leptomonas seymouri		Invertebrate + opportunisitic in vertebrates	Pecora
Trypanosomatidae	CMS001_035_Ra_S20	NODE_1435_length_396_cov_300.821317	JN006842.1	Trypanosoma sp. LZ-2011	Ficedula albicollis (Collared flycatcher)		Pecora
Trypanosomatidae	CMS001_035_Ra_S20	NODE_1476_length_390_cov_32.910543	KT728394.1	Trypanosoma thomasbancrofti	Xanthomyza phrygia (Regent honeyeater)		Pecora
Trypanosomatidae	CMS001_035_Ra_S20	NODE_1766_length_362_cov_0.877193	HQ906659.1	Trypanosoma culicavium	Ficedula albicollis (Collared flycatcher)	Birds (dixenous)	Pecora
Trypanosomatidae	CMS001_035_Ra_S20	NODE_1792_length_360_cov_560.692580	XM_029023350.1	Trypanosoma theileri	Bos taurus (Cow)	Cattle (dixenous)	Pecora
Trypanosomatidae	CMS001_035_Ra_S20	NODE_1926_length_350_cov_0.802198	XM_015802553.1	Leptomonas pyrrhocoris	Pyrrhocoris apterus (Firebug)	Invertebrates (monoxenous)	Pecora
Trypanosomatidae	CMS001_035_Ra_S20	NODE_1931_length_349_cov_1.797794	XM_015802462.1	Leptomonas pyrrhocoris	Pyrrhocoris apterus (Firebug)	Invertebrates (monoxenous)	Pecora
Trypanosomatidae	CMS001_035_Ra_S20	NODE_2039_length_341_cov_434.212121	JN006843.1	Trypanosoma sp. LZ-2011	Ficedula albicollis (Collared flycatcher)		Pecora
Trypanosomatidae	CMS001_035_Ra_S20	NODE_2055_length_340_cov_40.315589	KT728402.1	Trypanosoma avium	Xanthomyza phrygia (Regent honeyeater)	Birds (dixenous)	Pecora
Trypanosomatidae	CMS001_035_Ra_S20	NODE_2166_length_331_cov_0.755906	XM_003877341.1	Leishmania mexicana			Pecora
Trypanosomatidae	CMS001_035_Ra_S20	NODE_2244_length_325_cov_513.229839	HQ107970.1	Trypanosoma culicavium	Culex pipiens (Northern house mosquito)	Birds (dixenous)	Pecora
Trypanosomatidae	CMS001_035_Ra_S20	NODE_2387_length_315_cov_1.529412	XM_015799557.1	Leptomonas pyrrhocoris	Pyrrhocoris apterus (Firebug)	Invertebrates (monoxenous)	Pecora
Trypanosomatidae	CMS001_035_Ra_S20	NODE_2444_length_311_cov_183.658120	MK516192.1	Trypanosoma sp.	Otus lettia (Collared scops owl)		Pecora
Trypanosomatidae	CMS001_035_Ra_S20	NODE_2521_length_306_cov_0.772926	XM_015798305.1	Leptomonas pyrrhocoris	Pyrrhocoris apterus (Firebug)	Invertebrates (monoxenous)	Pecora
Trypanosomatidae	CMS001_035_Ra_S20	NODE_2573_length_303_cov_0.756637	HQ107970.1	Trypanosoma culicavium	Culex pipiens (Northern house mosquito)	Birds (dixenous)	Pecora
Trypanosomatidae	CMS001_035_Ra_S20	NODE_2584_length_302_cov_1.360000	CP029526.1	Leishmania donovani	Homo sapiens (Human)	Mammals (dixenous)	Pecora
Trypanosomatidae	CMS001_035_Ra_S20	NODE_2758_length_291_cov_0.831776	XM_015801862.1	Leptomonas pyrrhocoris	Pyrrhocoris apterus (Firebug)	Invertebrates (monoxenous)	Pecora
Trypanosomatidae	CMS001_035_Ra_S20	NODE_2778_length_289_cov_1.419811	Y00055.1	Crithidia fasciculata		Invertebrates (monoxenous)	Pecora
Trypanosomatidae	CMS001_035_Ra_S20	NODE_2916_length_282_cov_0.843902	KT944306.1	Leptomonas pyrrhocoris		Invertebrates (monoxenous)	Pecora
Trypanosomatidae	CMS001_035_Ra_S20	NODE_466_length_642_cov_346.054867	KT728396.1	Trypanosoma thomasbancrofti	Xanthomyza phrygia (Regent honeyeater)		Pecora
Trypanosomatidae	CMS001_035_Ra_S20	NODE_4268_length_257_cov_3.572222	XR_001548769.1	Leptomonas pyrrhocoris		Invertebrates (monoxenous)	Pecora
Trypanosomatidae	CMS001_035_Ra_S20	NODE_4707_length_250_cov_1.456647	KT728396.1	Trypanosoma thomasbancrofti	Xanthomyza phrygia (Regent honeyeater)		Pecora
Trypanosomatidae	CMS001_035_Ra_S20	NODE_4883_length_247_cov_1.858824	KT944307.1	Leptomonas seymouri		Invertebrate + opportunisitic in vertebrates	Pecora
Trypanosomatidae	CMS001_035_Ra_S20	NODE_5956_length_230_cov_1.431373	XM_801183.1	Trypanosoma cruzi	Homo sapiens (Human)	Mammals (dixenous)	Pecora
Trypanosomatidae	CMS001_035_Ra_S20	NODE_6121_length_184_cov_513.084112	AB828159.1	Trypanosoma sp. Coma4	Corvus macrorhynchos (Large-billed crow)		Pecora
Trypanosomatidae	CMS001_035_Ra_S20	NODE_6122_length_155_cov_503.538462	MN244156.1	Trypanosoma theileri	Atylotus fuscipes (Fly)	Cattle (dixenous)	Pecora
Trypanosomatidae	CMS001_035_Ra_S20	NODE_685_length_551_cov_1708.755274	KT944307.1	Leptomonas seymouri		Invertebrate + opportunisitic in vertebrates	Pecora
Trypanosomatidae	CMS001_035_Ra_S20	NODE_857_length_502_cov_985.705882	Y00055.1	Crithidia fasciculata		Invertebrates (monoxenous)	Pecora
Trypanosomatidae	CMS001_035_Ra_S20	NODE_99_length_1180_cov_509.263826	CP015657.1	Trypanosoma cruzi	Homo sapiens (Human)	Mammals (dixenous)	Pecora
Trypanosomatidae	CMS001_046_Ra_S3	NODE_1356_length_256_cov_1.631285	KF963538.1	Paratrypanosoma confusum	Culex pipiens (Northern house mosquito)	Invertebrates (monoxenous)	Pecora
Trypanosomatidae	CMS001_047_Ra_S4	NODE_1133_length_282_cov_1.424390	KT944293.1	Trypanosomatidae sp.			Aves
Trypanosomatidae	CMS001_047_Ra_S4	NODE_1219_length_277_cov_1.460000	XM_015802014.1	Leptomonas pyrrhocoris	Pyrrhocoris apterus (Firebug)	Invertebrates (monoxenous)	Aves
Trypanosomatidae	CMS001_047_Ra_S4	NODE_2196_length_246_cov_1.289941	KY264930.1	Crithidia luciliae thermophila		Invertebrates (monoxenous)	Aves
Trypanosomatidae	CMS001_047_Ra_S4	NODE_575_length_366_cov_0.757785	FJ807258.1	Leptomonas bifurcata			Aves
Trypanosomatidae	CMS001_049_Ra_S6	NODE_13_length_1830_cov_51.050200	KT944307.1	Leptomonas seymouri		Invertebrate + opportunisitic in vertebrates	Rodentia
Trypanosomatidae	CMS001_049_Ra_S6	NODE_15_length_1741_cov_63.817909	KF054114.1	Leptomonas tenua	Monopsyllus sciurorum (Fleas)		Rodentia
Trypanosomatidae	CMS001_049_Ra_S6	NODE_295_length_424_cov_77.138329	CP040155.1	Leptomonas amazonensis	Homo sapiens (Human)		Rodentia
Trypanosomatidae	CMS001_059_Ra_S10	NODE_11_length_1560_cov_41.813216	JN006830.1	Trypanosoma sp. LZ-2011	Culex pipiens (Northern house mosquito)		Aves
Trypanosomatidae	CMS001_059_Ra_S10	NODE_467_length_278_cov_2.582090	JN006843.1	Trypanosoma sp. LZ-2011	Ficedula albicollis (Collared flycatcher)		Aves
Trypanosomatidae	CMS001_059_Ra_S10	NODE_59_length_622_cov_41.491743	JN006832.1	Trypanosoma sp. LZ-2011	Phylloscopus collybita (Eurasian chiffchaff)		Aves
