# Supplementary material for: Single mosquito metatranscriptomics identifies vectors, emerging pathogens and reservoirs in one assay
Source: eLife. 2021 Apr 27;10:e68353. doi: 10.7554/eLife.68353 (PMC8110308; doi:10.7554/eLife.68353)
Supplement: Figure 6—figure supplement 1—source data 1. [file elife-68353-fig6-figsupp1-data1.xlsx]

## Sheet: TableSX_cooccurrenceRPM
	RNA1 Hubei chryso-like virus 1 (Chryso)	RNA2 Hubei chryso-like virus 1 (Chryso)	RNA3 Hubei chryso-like virus 1 (Chryso)	RNA4 Hubei chryso-like virus 1 (Chryso)	RNA1 Keturi virus (Chryso)	RNA2 Keturi virus (Chryso)	RNA3 Keturi virus (Chryso)	RNA4 Keturi virus (Chryso)	RNA1 Culex mosquito virus 4 (Chu)	RNA2 Culex mosquito virus 4 (Chu)	RNA1 Culex-associated Luteo-like virus (Luteo)	RNA2 Culex-associated Luteo-like virus (Luteo)	RNA1 Culex narnavirus 1 (Narna)	RNA2 Culex narnavirus 1 (Narna)	PB1 Ūsinis virus (Orthomyxo)	PB2 Ūsinis virus (Orthomyxo)	PA Ūsinis virus (Orthomyxo)	NP Ūsinis virus (Orthomyxo)	gp64 Ūsinis virus (Orthomyxo)	hypothetical Ūsinis virus (Orthomyxo)	hypothetical2 Ūsinis virus (Orthomyxo)	hypothetical3 Ūsinis virus (Orthomyxo)	PB1 Wuhan mosquito virus 6 (Orthomyxo)	PB2 Wuhan mosquito virus 6 (Orthomyxo)	PA Wuhan mosquito virus 6 (Orthomyxo)	NP Wuhan mosquito virus 6 (Orthomyxo)	gp64 Wuhan mosquito virus 6 (Orthomyxo)	hypothetical Wuhan mosquito virus 6 (Orthomyxo)	hypothetical2 Wuhan mosquito virus 6 (Orthomyxo)	hypothetical3 Wuhan mosquito virus 6 (Orthomyxo)	PB1 Guadeloupe mosquito quaranja-like virus 1 (Orthomyxo)	PB2 Guadeloupe mosquito quaranja-like virus 1 (Orthomyxo)	PA Guadeloupe mosquito quaranja-like virus 1 (Orthomyxo)	NP Guadeloupe mosquito quaranja-like virus 1 (Orthomyxo)	gp64 Guadeloupe mosquito quaranja-like virus 1 (Orthomyxo)	hypothetical Guadeloupe mosquito quaranja-like virus 1 (Orthomyxo)	hypothetical2 Guadeloupe mosquito quaranja-like virus 1 (Orthomyxo)	hypothetical3 Guadeloupe mosquito quaranja-like virus 1 (Orthomyxo)	PB1 Astopletus virus (Orthomyxo)	PB2 Astopletus virus (Orthomyxo)	PA Astopletus virus (Orthomyxo)	NP Astopletus virus (Orthomyxo)	gp64 Astopletus virus (Orthomyxo)	hypothetical Astopletus virus (Orthomyxo)	hypothetical2 Astopletus virus (Orthomyxo)	hypothetical3 Astopletus virus (Orthomyxo)	RNA1 3110|Partiti-like (Partiti)	RNA2 3110|Partiti-like (Partiti)	RNA1 1636|Partiti-like (Partiti)
CMS002_023a_Rb_S138_L004	45081.7	13999.9	14687.4	7468.17									163192	124476
CMS002_022a_Rb_S137_L004	53794.5	52241.6	54150.2	14592.6									76361.7	27441.9																																			219.744
CMS001_053_Ra_S8					12389	28283.3	13469.4	12773.1
CMS001_059_Ra_S10									44252.5	14891			16350.6	23182.8
CMS001_044_Ra_S25									22040.4	10756.5			12922	5083.23
CMS002_051a_Rb_S6_L004									123444	32356.6			38916.9	0
CMS002_054a_Rb_S8_L004									136118	48083.4
CMS002_057a_Rb_S10_L004									45282.3	10530.1
CMS002_056a_Rb_S9_L004									12.4382	0													24384.4	16099	18049.2	32946.6	7637.43	15727.8	1837.01	7134.14
CMS002_035a_Rb_S169_L004											1691.15	951.97
CMS002_032a_Rb_S166_L004											0	27.9991
CMS002_040a_Rb_S174_L004											59845.3	31818.2
CMS002_031a_Rb_S165_L004											173.595	72.7977	0	717.189
CMS002_041a_Rb_S176_L004											19011.4	9838.89
CMS002_038a_Rb_S172_L004											75872	37754	0	138.405
CMS002_029e_Rb_S164_L004											27601.5	12482											6102.39	3711.77	7027.19	15476.2	2755.51	2138.98	830.429	2610.82
CMS001_035_Ra_S20													31141.1	36167.7
CMS001_022_Ra_S6													10569.1	25227.4
CMS001_011_Ra_S4													53638.2	66308.5
CMS001_045_Ra_S2													8927.11	8316.87
CMS001_047_Ra_S4													15174.2	23415.6
CMS001_058_Ra_S9													24013.2	5498.45
CMS001_037_Ra_S21													21188.5	21572.3
CMS001_019_Ra_S14													46158	70882.1
CMS001_018_Ra_S14													10619.4	6693.76
CMS001_023_Ra_S17													55959.6	62628.2
CMS001_048_Ra_S5													6341.46	11437.3
CMS001_052_Ra_S7													19307.5	23881.1
CMS001_041_Ra_S10													32695	21446.5
CMS001_029_Ra_S18													142123	130962
CMS001_030_Ra_S7													39256.6	49681
CMS001_040_Ra_S21													45856	34821.4
CMS001_004_Ra_S2													35029	48888.4
CMS001_054_Ra_S11													7574.52	6328.88
CMS001_002_Ra_S1													55091.4	25491.7									2981.99	1283.39	2768.1	7171.89	1547.62	1308.55	452.961	1069.49
CMS001_036_Ra_S20													18829.3	14847.1									6605.68	6127.56	6190.47	10342.6	2768.1	5605.4	1988	3321.72
CMS001_051_Ra_S8													38350.7	40011.6
CMS001_038_Ra_S22													16872.8	3736.93									14356.4	10078.4	12066.4	18225.4	6064.65	7624.85	1321.14	4441.54
CMS001_042_Ra_S23													58885	23862.2									14853.4	10707.5	13035.2	16256.3	4951.12	6460.99	830.429	3372.04
CMS001_034_Ra_S19													76619.7	60803.8									6970.57	5743.8	6599.39	7996.02	2717.77	4416.37	415.214	2050.91
CMS001_028_Ra_S17													9323.45	9298.29									10286	9059.22	10657.2	17470.5	4076.65	7209.63	1686.02	6523.9
CMS002_053a_Rb_S7_L004													98808.5	57972.7
CMS002_001a_Rb_S116_L004													91881.9	162764
CMS002_028e_Rb_S158_L004													290386	204663
CMS002_028d_Rb_S157_L004													199215	191766
CMS002_047j_Rb_S3_L004													177963	156316
CMS002_047f_Rb_S198_L004													31594	41760.5
CMS002_047a_Rb_S193_L004													38948.4	31675.8
CMS002_028a_Rb_S154_L004													0	195.025
CMS002_027b_Rb_S153_L004													332430	247625
CMS002_046b_Rb_S192_L004													212181	142400
CMS002_046a_Rb_S191_L004													138128	120544
CMS002_027a_Rb_S152_L004													71656	40867.2
CMS002_029d_Rb_S162_L004													231274	180430									11273.7	8191.05	10575.4	23019.2	6391.79	5819.29	2535.32	4661.73
CMS002_029c_Rb_S161_L004													53084.5	36048.2									7914.24	5712.34	9392.65	12255.1	4881.92	3686.6	2579.36	4177.31
CMS002_044d_Rb_S181_L004															5055.37	12277.3	14925.4	25878.7	9388.54	8666.35	19860.4	13240.3
CMS002_044a_Rb_S178_L004															1083.29	1925.85	5296.1	8184.88	2888.78	1324.03	4333.17	2888.78
CMS002_044e_Rb_S182_L004															842.561	1685.12	3009.15	10832.9	2166.59	1324.03	10110.7	9147.81
CMS002_045e_Rb_S188_L004															34906.1	56572	61627.3	101107	52961	35387.6	64275.4	34906.1																									6018.3	9027.44
CMS002_045d_Rb_S186_L004															42368.8	59220	74386.1	128430	107487	60784.8	94366.9	27202.7																									4573.9	0
CMS002_045c_Rb_S185_L004															63673.6	74386.1	97977.9	118199	89793	46100.1	55970.1	22388.1
CMS002_045g_Rb_S190_L004															32498.8	40442.9	73423.2	70053	54405.4	30091.5	40202.2	16851.2																									40322.6	24073.2
CMS002_026d_Rb_S149_L004															57294.2	102792	116033	122773	79200.8	69330.8	68247.5	97737.1																									86182	77515.6
CMS002_045b_Rb_S184_L004															337265	443669	479538	389384	204141	152383	95931.6	138180																									7221.95	2888.78
CMS002_045a_Rb_S183_L004															86182	102913	108089	107848	50794.4	31535.9	28406.4	28887.8																									151902	71738.1
CMS002_026c_Rb_S148_L004															32739.5	47424.2	64756.9	64756.9	42368.8	39720.8	38878.2	64756.9																									12879.2	13842.1
CMS002_045f_Rb_S189_L004															28887.8	42128.1	48146.4	50553.7	35869	22628.8	24795.4	22147.3																									7944.15	1324.03
CMS002_026e_Rb_S150_L004															22628.8	29730.4	44535.4	43331.7	35387.6	43813.2	38517.1	73663.9																									14925.4	27684.2
CMS002_026b_Rb_S147_L004															43572.5	59460.8	76071.3	85580.2	48387.1	61145.9	77395.3	83052.5																									11073.7	13240.3
CMS002_026a_Rb_S146_L004															21906.6	28887.8	38757.8	36350.5	24915.7	25637.9	28767.5	46461.2																									13481	18175.3
CMS001_039_Ra_S9																							9008.9	5586.52	9354.91	11865.1	4630.27	6957.99	1522.45	3428.66
CMS001_032_Ra_S7																							7958.28	5120.98	6498.74	8172.18	2705.19	2717.77	484.417	1547.62
CMS001_043_Ra_S24																							5045.48	3699.18	5284.55	8291.71	2673.73	2453.54	415.214	1144.99
CMS002_018b_Rb_S129_L004																															89671.4	112601	92742.3	126625	191115	195107	228887	81482.2
CMS002_017b_Rb_S123_L004																															36237.1	27638.4	22315.5	36134.7	48111.4	41764.8	124271	38079.6
CMS002_017c_Rb_S124_L004																															77797.1	49953.9	26614.8	39103.3	97451.1	36032.3	107483	54458
CMS002_017a_Rb_S122_L004																															36032.3	26717.2	15968.9	43197.9	41355.3	30299.9	104412	30299.9
CMS002_017e_Rb_S126_L004																															68481.9	50977.6	32756.7	36748.9	51591.8	24362.8	83529.5	18425.6
CMS001_046_Ra_S3																																							3424.97	4262.99	3279.23	2186.15	2259.02	5902.61	3206.35	4918.84
CMS001_027_Ra_S16																																							16068.2	18691.6	16942.7	11021.8	1348.13	3388.53	3315.66	3261.01
CMS001_025_Ra_S7																																																	7102.44
CMS001_008_Ra_S3																																																	7259.4
CMS002_020a_Rb_S131_L004																																																	46597.5
CMS002_021a_Rb_S136_L004																																																	66649.1
CMS002_020e_Rb_S135_L004																																																	181473
CMS002_020c_Rb_S133_L004																																																	107726
CMS002_020b_Rb_S132_L004																																																	90511
CMS002_020d_Rb_S134_L004																																																	31031
CMS002_029a_Rb_S159_L004																																																	0
CMS001_003_Ra_S2
CMS001_033_Ra_S8
CMS002_049a_Rb_S4_L004
CMS002_013a_Rb_S120_L004
CMS002_010a_Rb_S119_L004
CMS002_029b_Rb_S160_L004
CMS002_044c_Rb_S180_L004
CMS001_001_Ra_S1
CMS001_057_Ra_S11
CMS001_017_Ra_S6
CMS002_028b_Rb_S155_L004
CMS002_047i_Rb_S2_L004
CMS002_047h_Rb_S1_L004
CMS001_021_Ra_S16
CMS001_013_Ra_S5
CMS001_049_Ra_S6
CMS001_056_Ra_S10
CMS001_020_Ra_S15
CMS002_047g_Rb_S200_L004
CMS001_012_Ra_S4
CMS001_024_Ra_S15
CMS001_015_Ra_S13
CMS001_031_Ra_S19
CMS002_033a_Rb_S167_L004
CMS002_039a_Rb_S173_L004
CMS002_034a_Rb_S168_L004
CMS002_037a_Rb_S171_L004
CMS002_036a_Rb_S170_L004
CMS002_042a_Rb_S177_L004
CMS002_044b_Rb_S179_L004
CMS001_006_Ra_S5
CMS002_017d_Rb_S125_L004
CMS002_019a_Rb_S130_L004
CMS002_018a_Rb_S128_L004
[truncated: 47 more columns]
