# Supplementary material for: Single mosquito metatranscriptomics identifies vectors, emerging pathogens and reservoirs in one assay
Source: eLife. 2021 Apr 27;10:e68353. doi: 10.7554/eLife.68353 (PMC8110308; doi:10.7554/eLife.68353)
Supplement: Figure 6—figure supplement 3—source data 1. [file elife-68353-fig6-figsupp3-data1.newick]

(('PB1|Wuhan mosquito virus 4|KM817623':0.46756376999999993,('PB1|Usinis virus|CMS002_026c_Rb_S148_L004|NODE_3_length_2431_cov_7.963042':0.43769561999999995,('PB1|Wuhan mosquito virus 6|CMS002_029e_Rb_S164_L004|NODE_12_length_2433_cov_28.686333':0.013699369999999877,'PB1|Wuhan mosquito virus 6|MF176379':0.008293199999999779):0.49339284000000005):0.3043170099999999):0.3424566849999999,(('PB1|Sanxia waterstrider virus 3|KM817617':0.80210289,'PB1|Jingshan fly virus 1|KM817615':0.44278657999999993):0.1585002900000001,(('PB1|Wuhan mosquito virus 3|KM817622':0.39969730000000014,'PB1|Astopletus virus|CMS001_027_Ra_S16|NODE_3_length_2447_cov_21.006751':0.4448953699999998):0.22615907000000002,('PB1|Wuhan mosquito virus 5|KM817624':0.44417967,('PB1|Aedes alboannulatus orthomyxo-like virus|MF176325':0.2380568700000001,('PB1|Whidbey virus|KX898491':0.11173613000000016,('PB1|Guadeloupe mosquito quaranja-like virus 1|MN053838':0.0061264500000000055,'PB1|Guadeloupe mosquito quaranja-like virus 1|CMS002_017c_Rb_S124_L004|NODE_5_length_2434_cov_22.260501':0.0037509899999998986):0.09829101000000007):0.3749090799999999):0.12453792000000008):0.21138374000000004):0.15932659999999998):0.3424566849999999);
