# Supplementary material for: Single mosquito metatranscriptomics identifies vectors, emerging pathogens and reservoirs in one assay
Source: eLife. 2021 Apr 27;10:e68353. doi: 10.7554/eLife.68353 (PMC8110308; doi:10.7554/eLife.68353)
Supplement: Figure 6—figure supplement 5—source data 1. [file elife-68353-fig6-figsupp5-data1.csv]

sample	read_prop_fungi	read_prop_CxNV1
CMS001_002_Ra_S1	1.6670695418059365e-05	0.0355891562683204
CMS001_006_Ra_S5	0.00015682338550324624	0.0
CMS001_007_Ra_S12	0.00017228224754497795	0.0
CMS001_008_Ra_S3	0.00014741000619122025	0.0
CMS001_009_Ra_S13	0.016330483569329413	0.0
CMS001_012_Ra_S4	0.0011900885165339412	0.0
CMS001_013_Ra_S5	0.0001452595117045645	0.0
CMS001_014_Ra_S5	2.941717227431513e-05	0.0
CMS001_018_Ra_S14	9.861770845318123e-05	0.045232655610525786
CMS001_022_Ra_S6	3.779456136261992e-05	0.03584184235888456
CMS001_023_Ra_S17	0.00010228609420549276	0.3213488126289231
CMS001_025_Ra_S7	8.065491793362099e-05	0.0
CMS001_028_Ra_S17	0.0012724959098345755	0.03363024904562807
CMS001_033_Ra_S8	0.00012708388691844678	0.0
CMS001_035_Ra_S20	3.690623545042641e-05	0.030373831775700938
CMS001_036_Ra_S20	0.0018239996258462307	0.020862970079390752
CMS001_037_Ra_S21	4.826580946589055e-05	0.06561254138793163
CMS001_038_Ra_S22	0.006067761887261609	0.025615963843645662
CMS001_043_Ra_S24	0.00024638633377135346	0.0
CMS001_044_Ra_S25	7.786706534604123e-05	0.044571108204074006
CMS001_045_Ra_S2	4.575821359934108e-05	0.02090387724596565
CMS001_052_Ra_S7	0.00018510805682817345	0.15884585126567635
CMS001_058_Ra_S9	0.00029451611003121877	0.0460525024052149
CMS002_017d_Rb_S125	1.619243084820001e-05	0.0
CMS002_018b_Rb_S129	0.00012355622265746555	0.0
CMS002_019a_Rb_S130	2.376934230229849e-05	0.0
CMS002_020b_Rb_S132	4.405356914007433e-05	0.0
CMS002_020c_Rb_S133	3.610440079823548e-05	0.0
CMS002_020d_Rb_S134	7.839224629418472e-05	0.0
CMS002_020e_Rb_S135	1.4665516238392855e-05	0.0
CMS002_021a_Rb_S136	5.1790190937836374e-05	0.0
CMS002_023a_Rb_S138	0.00021680644112226897	0.4506223330344032
CMS002_025a_Rb_S140	0.007290400972053463	0.0
CMS002_025c_Rb_S142	0.0384404173531027	0.0
CMS002_025e_Rb_S144	0.00384172109104879	0.0
CMS002_026a_Rb_S146	0.0034171558748795237	0.0
CMS002_026b_Rb_S147	0.0167427701674277	0.0
CMS002_026c_Rb_S148	0.05524539621698192	0.0
CMS002_026d_Rb_S149	0.031106471816283936	0.0
CMS002_026e_Rb_S150	0.010241790729595609	0.0
CMS002_028a_Rb_S154	7.992966189753018e-05	0.0
CMS002_028b_Rb_S155	0.00020845948441020856	0.0
CMS002_028c_Rb_S156	0.00010565017115327725	0.0
CMS002_028d_Rb_S157	6.510087018163143e-05	0.4495432088942256
CMS002_028e_Rb_S158	1.2713487261880355e-05	0.12505303907967066
CMS002_029a_Rb_S159	0.00015597611337235211	0.0
CMS002_029b_Rb_S160	0.0001226653238041745	0.0
CMS002_029d_Rb_S162	0.018867247877838063	0.23469120616260766
CMS002_035a_Rb_S169	1.364035499023862e-05	0.0
CMS002_036a_Rb_S170	0.00010589774816002661	0.0
CMS002_037a_Rb_S171	1.0573730623638631e-05	0.0
CMS002_038a_Rb_S172	1.8272683252172166e-05	0.0
CMS002_044a_Rb_S178	0.013345195729537369	0.0
CMS002_044c_Rb_S180	0.02767429483767962	0.0
CMS002_044d_Rb_S181	0.003875968992248062	0.0
CMS002_044e_Rb_S182	0.004426285325161729	0.0
CMS002_045a_Rb_S183	0.0007201290471252447	0.0
CMS002_045b_Rb_S184	0.0012452746275294641	0.0
CMS002_045c_Rb_S185	3.834649896464453e-05	0.0
CMS002_045g_Rb_S190	6.13170911171974e-05	0.0
CMS002_047b_Rb_S194	0.00187976123734459	0.0
CMS002_047c_Rb_S195	0.0003341642281709476	0.0
CMS002_047d_Rb_S196	0.00043176198139498374	0.0
CMS002_047e_Rb_S197	0.00077457171766512	0.0
CMS002_047f_Rb_S198	3.44955457626534e-05	0.10055451589813466
CMS002_047g_Rb_S200	0.0003455647170387515	0.0
CMS002_047h_Rb_S1	0.00016874789065136686	0.0
CMS002_047i_Rb_S2	4.201504138481576e-05	0.0
CMS002_047j_Rb_S3	0.0020177846601440604	0.4155619686695917
CMS002_049a_Rb_S4	0.0010906882490735348	0.0
CMS002_051a_Rb_S6	4.345936549326379e-05	0.044806605823554974
CMS002_053a_Rb_S7	0.0017249295646317086	0.022261506825575768
CMS002_054a_Rb_S8	3.556778033338866e-05	0.0
CMS002_056a_Rb_S9	0.000538588265112153	0.0
CMS002_057a_Rb_S10	0.0011927143348090647	0.0
CMS001_004_Ra_S2	0.0	0.2958961845607808
CMS001_011_Ra_S4	0.0	0.13148784154701315
CMS001_019_Ra_S14	0.0	0.2710254505193538
CMS001_029_Ra_S18	0.0	0.5440348920277231
CMS001_030_Ra_S7	0.0	0.2079521049689624
CMS001_034_Ra_S19	0.0	0.20471393093107165
CMS001_040_Ra_S21	0.0	0.19393279496718385
CMS001_041_Ra_S10	0.0	0.08674441342189879
CMS001_042_Ra_S23	0.0	0.10040611307042856
CMS001_047_Ra_S4	0.0	0.06128300680367259
CMS001_048_Ra_S5	0.0	0.06518580029063732
CMS001_051_Ra_S8	0.0	0.0657211599341522
CMS001_054_Ra_S11	0.0	0.05512734166479583
CMS001_059_Ra_S10	0.0	0.06700003198601145
CMS002_001a_Rb_S116	0.0	0.5092599582295363
CMS002_022a_Rb_S137	0.0	0.19383943046450972
CMS002_027a_Rb_S152	0.0	0.5544155481851152
CMS002_027b_Rb_S153	0.0	0.5299544203102637
CMS002_029c_Rb_S161	0.0	0.08473228115711474
CMS002_046a_Rb_S191	0.0	0.4963603220782984
CMS002_046b_Rb_S192	0.0	0.6260774904469919
CMS002_047a_Rb_S193	0.0	0.1034130164432776
