# Supplementary material for: Single mosquito metatranscriptomics identifies vectors, emerging pathogens and reservoirs in one assay
Source: eLife. 2021 Apr 27;10:e68353. doi: 10.7554/eLife.68353 (PMC8110308; doi:10.7554/eLife.68353)
Supplement: Supplementary file 1. [file elife-68353-supp1.xlsx]

## Sheet: SupplementaryFile1
California Arbobulletin ID - Date*	1 - 3/11/16			18 - 8/4/17			20 - 8/18/17			21 - 8/25/17			22 _9/1/17			23 _9/8/17			24 _9/15/17			25 _9/22/17			26 _9/29/17			27 _10/6/17			28 _10/13/17			29 _10/20/17			30 _10/27/17			32 _11/9/17			33 _11/17/17			34 _12/1/17
Sample collection dates covered in reporting period	2016-02-10			2017-08-03			2017-08-18			8/23/2017-8/25/17			2017-08-29			2017-08-31			9/10/17-9/19/17			2017-09-21			9/27/17-9/29/17			10/3/17-10/6/17			2017-10-07			2017-10-17			10/23/17-10/24/17			2017-11-07			2017-11-15			11/21/2017-12/1/17
Samples collected and WNV & SLEV reported positives	samples	WNV	SLEV	samples	WNV	SLEV	samples	WNV	SLEV	samples	WNV	SLEV	samples	WNV	SLEV	samples	WNV	SLEV	samples	WNV	SLEV	samples	WNV	SLEV	samples	WNV	SLEV	samples	WNV	SLEV	samples	WNV	SLEV	samples	WNV	SLEV	samples	WNV	SLEV	samples	WNV	SLEV	samples	WNV	SLEV	samples	WNV	SLEV
Alameda	1	0	0	5	0	0	1	0	0	5	0	0	0	0	0	2	0	0	21	0	0	7	0	0	4	0	0	9	0	0	1	0	0	2	0	0	2	0	0	0	0	0	0	0	0	0	0	0
Placer	0	0	0	0	10	0	0	5	0	0	4	1	0	4	0	0	7	0	0	11	0	0	3	0	0	3	0	0	2	0	0	1	0	0	0	1	0	0	1	0	0	1	0	0	1	7	0	1
Coachella Valley	0	0	0	0	0	0	0	0	0	0	0	0	0	0	0	0	0	0	0	0	0	0	0	0	0	0	0	0	0	0	0	0	0	0	0	0	0	0	0	12	0	0	0	0	0	0	0	0
West Valley	0	0	0	0	0	0	0	0	0	11	0	0	5	0	0	0	0	0	0	0	0	0	0	0	0	0	0	0	0	0	0	0	0	0	0	0	7	0	0	0	0	0	12	0	0	12	0	0
San Diego	0	0	0	0	0	0	0	1	0	0	0	0	0	0	0	0	2	0	0	0	0	0	0	0	0	0	0	0	0	0	0	0	0	0	0	0	0	0	0	0	0	0	6	0	0	16	0	0
totals	1	0	0	5	10	0	1	6	0	16	4	1	5	4	0	2	9	0	21	11	0	7	3	0	4	3	0	9	2	0	1	1	0	2	0	1	9	0	1	12	0	1	18	0	1	35	0	1
*source = https://westnile.ca.gov/resources_reports.php?report_category_id=6
