# Supplementary material for: Single mosquito metatranscriptomics identifies vectors, emerging pathogens and reservoirs in one assay
Source: eLife. 2021 Apr 27;10:e68353. doi: 10.7554/eLife.68353 (PMC8110308; doi:10.7554/eLife.68353)
Supplement: Table 1—source data 1. [file elife-68353-table1-data1.csv]

sci_name novel baltimore_group genome_description number_of_segments_conventional n_segments family submission_taxid n_samples samples
Placeda virus True IV single stranded RNA positive sense 1 1 Flaviviridae 38144 3 ['CMS001_002_Ra_S1'	'CMS001_039_Ra_S9'	'CMS002_056a_Rb_S9_L004']
Astopletus virus True V single stranded RNA negative sense 8 8 Orthomyxoviridae 1566308 2 ['CMS001_027_Ra_S16'	'CMS001_046_Ra_S3']
Ūsinis virus True V single stranded RNA negative sense 8 8 Orthomyxoviridae 1566308 15 ['CMS002_026a_Rb_S146_L004'	'CMS002_026b_Rb_S147_L004'	'CMS002_026c_Rb_S148_L004'	'CMS002_026d_Rb_S149_L004'	'CMS002_026e_Rb_S150_L004'	'CMS002_044a_Rb_S178_L004'	'CMS002_044d_Rb_S181_L004'	'CMS002_044e_Rb_S182_L004'	'CMS002_045a_Rb_S183_L004'	'CMS002_045b_Rb_S184_L004'	'CMS002_045c_Rb_S185_L004'	'CMS002_045d_Rb_S186_L004'	'CMS002_045e_Rb_S188_L004'	'CMS002_045f_Rb_S189_L004'	'CMS002_045g_Rb_S190_L004']
Wuhan mosquito virus 6 False V single stranded RNA negative sense 8 8 Orthomyxoviridae 1608131 13 ['CMS001_002_Ra_S1'	'CMS001_028_Ra_S17'	'CMS001_032_Ra_S7'	'CMS001_034_Ra_S19'	'CMS001_036_Ra_S20'	'CMS001_038_Ra_S22'	'CMS001_039_Ra_S9'	'CMS001_042_Ra_S23'	'CMS001_043_Ra_S24'	'CMS002_029c_Rb_S161_L004'	'CMS002_029d_Rb_S162_L004'	'CMS002_029e_Rb_S164_L004'	'CMS002_056a_Rb_S9_L004']
Guadeloupe mosquito quaranja-like virus 1 False V single stranded RNA negative sense 8 8 Orthomyxoviridae 2607737 5 ['CMS002_017a_Rb_S122_L004'	'CMS002_017b_Rb_S123_L004'	'CMS002_017c_Rb_S124_L004'	'CMS002_017e_Rb_S126_L004'	'CMS002_018b_Rb_S129_L004']
Culex flavivirus False IV single stranded RNA positive sense 1 1 Flaviviridae 390844 3 ['CMS001_029_Ra_S18'	'CMS001_044_Ra_S25'	'CMS002_049a_Rb_S4_L004']
Whakaata virus True IV single stranded RNA positive sense 1 1 Narnaviridae 908833 1 ['CMS001_009_Ra_S13']
Hubei mosquito virus 4 False IV single stranded RNA positive sense 1 or 2 1 Tombusviridae 1922928 18 ['CMS001_001_Ra_S1'	'CMS001_015_Ra_S13'	'CMS001_018_Ra_S14'	'CMS001_019_Ra_S14'	'CMS001_020_Ra_S15'	'CMS001_035_Ra_S20'	'CMS001_045_Ra_S2'	'CMS001_047_Ra_S4'	'CMS001_049_Ra_S6'	'CMS001_057_Ra_S11'	'CMS001_058_Ra_S9'	'CMS002_028a_Rb_S154_L004'	'CMS002_028e_Rb_S158_L004'	'CMS002_029c_Rb_S161_L004'	'CMS002_038a_Rb_S172_L004'	'CMS002_047a_Rb_S193_L004'	'CMS002_047c_Rb_S195_L004'	'CMS002_047g_Rb_S200_L004']
Culex pipiens-associated Tunisia virus False IV single stranded RNA positive sense 1 or more 1 Virgaviridae 2079148 13 ['CMS002_028b_Rb_S155_L004'	'CMS002_028c_Rb_S156_L004'	'CMS002_028d_Rb_S157_L004'	'CMS002_028e_Rb_S158_L004'	'CMS002_047a_Rb_S193_L004'	'CMS002_047b_Rb_S194_L004'	'CMS002_047c_Rb_S195_L004'	'CMS002_047d_Rb_S196_L004'	'CMS002_047e_Rb_S197_L004'	'CMS002_047f_Rb_S198_L004'	'CMS002_047g_Rb_S200_L004'	'CMS002_047h_Rb_S1_L004'	'CMS002_047j_Rb_S3_L004']
Patollo virus True IV single stranded RNA positive sense 3 1 Botourmiaviridae 2587553 1 ['CMS002_053a_Rb_S7_L004']
Picullus virus True IV single stranded RNA positive sense 3 1 Botourmiaviridae 2587553 1 ['CMS002_053a_Rb_S7_L004']
Poccolus virus True IV single stranded RNA positive sense 3 1 Botourmiaviridae 1629669 1 ['CMS002_053a_Rb_S7_L004']
Calbertado virus False IV single stranded RNA positive sense 1 1 Flaviviridae 537023 1 ['CMS001_032_Ra_S7']
Nefer virus True III double stranded RNA 2 3 Partitiviridae 37960 10 ['CMS001_008_Ra_S3'	'CMS001_025_Ra_S7'	'CMS002_020a_Rb_S131_L004'	'CMS002_020b_Rb_S132_L004'	'CMS002_020c_Rb_S133_L004'	'CMS002_020d_Rb_S134_L004'	'CMS002_020e_Rb_S135_L004'	'CMS002_021a_Rb_S136_L004'	'CMS002_022a_Rb_S137_L004'	'CMS002_029a_Rb_S159_L004']
Nuyav virus True III double stranded RNA 1 1 Totiviridae 39756 1 ['CMS001_012_Ra_S4']
Mughataa virus True III double stranded RNA 1 1 Totiviridae 39756 1 ['CMS001_016_Ra_S6']
Elisy virus True V single stranded RNA negative sense 1 1 Rhabdoviridae 35303 3 ['CMS001_039_Ra_S9'	'CMS002_032a_Rb_S166_L004'	'CMS002_042a_Rb_S177_L004']
Chimba virus True IV single stranded RNA positive sense 1 1 Leviviridae 12008 1 ['CMS001_047_Ra_S4']
Koroku virus True III double stranded RNA 1 1 Totiviridae 39756 1 ['CMS002_020d_Rb_S134_L004']
Culex iflavi-like virus 4 False IV single stranded RNA positive sense 1 1 Iflaviridae 2304480 6 ['CMS001_002_Ra_S1'	'CMS001_046_Ra_S3'	'CMS002_034a_Rb_S168_L004'	'CMS002_039a_Rb_S173_L004'	'CMS002_045c_Rb_S185_L004'	'CMS002_045g_Rb_S190_L004']
Cafluga virus True IV single stranded RNA positive sense 1 1 Iflaviridae 1111709 1 ['CMS001_060_Ra_S12']
Lasigmu virus True III double stranded RNA 10-12 1 Reoviridae 40068 1 ['CMS001_012_Ra_S4']
Calumiyane virus True IV single stranded RNA positive sense 1 1 Iflaviridae 1111709 3 ['CMS002_020a_Rb_S131_L004'	'CMS002_020b_Rb_S132_L004'	'CMS002_020c_Rb_S133_L004']
Lobuck virus True III double stranded RNA 10-12 5 Reoviridae 40068 1 ['CMS001_012_Ra_S4']
Culex iflavi-like virus 3 False IV single stranded RNA positive sense 1 1 Iflaviridae 2304479 2 ['CMS001_051_Ra_S8'	'CMS002_038a_Rb_S172_L004']
Emileo virus True III double stranded RNA 1 1 Totiviridae 39756 1 ['CMS001_005_Ra_S3']
Elemess virus True III double stranded RNA 10-12 8 Reoviridae 1567403 6 ['CMS001_001_Ra_S1'	'CMS001_020_Ra_S15'	'CMS001_035_Ra_S20'	'CMS001_049_Ra_S6'	'CMS001_056_Ra_S10'	'CMS002_047g_Rb_S200_L004']
Canya virus True V single stranded RNA negative sense 1 1 Rhabdoviridae 35303 2 ['CMS001_031_Ra_S19'	'CMS002_037a_Rb_S171_L004']
Pikulas virus True IV single stranded RNA positive sense 3 1 Botourmiaviridae 2587553 1 ['CMS002_053a_Rb_S7_L004']
Netjeret virus True III double stranded RNA 2 2 Partitiviridae 37960 11 ['CMS002_026a_Rb_S146_L004'	'CMS002_026b_Rb_S147_L004'	'CMS002_026c_Rb_S148_L004'	'CMS002_026d_Rb_S149_L004'	'CMS002_026e_Rb_S150_L004'	'CMS002_045a_Rb_S183_L004'	'CMS002_045b_Rb_S184_L004'	'CMS002_045d_Rb_S186_L004'	'CMS002_045e_Rb_S188_L004'	'CMS002_045f_Rb_S189_L004'	'CMS002_045g_Rb_S190_L004']
Erebo virus True IV single stranded RNA positive sense 1 or 2 2 Tombusviridae 137555 4 ['CMS001_006_Ra_S5'	'CMS001_025_Ra_S7'	'CMS001_052_Ra_S7'	'CMS001_058_Ra_S9']
Nebet virus True III double stranded RNA 2 2 Partitiviridae 37960 2 ['CMS001_003_Ra_S2'	'CMS002_020a_Rb_S131_L004']
Hubei chryso-like virus 1 False III double stranded RNA 4 4 Chrysoviridae 1922855 2 ['CMS002_022a_Rb_S137_L004'	'CMS002_023a_Rb_S138_L004']
Keturi virus True III double stranded RNA 4 4 Chrysoviridae 2587491 1 ['CMS001_053_Ra_S8']
Snelk virus True III double stranded RNA 1 1 Totiviridae 39756 4 ['CMS001_027_Ra_S16'	'CMS001_032_Ra_S7'	'CMS001_043_Ra_S24'	'CMS001_051_Ra_S8']
Stang virus True V single stranded RNA negative sense 1 1 Rhabdoviridae 35303 4 ['CMS001_015_Ra_S13'	'CMS001_048_Ra_S5'	'CMS002_047a_Rb_S193_L004'	'CMS002_053a_Rb_S7_L004']
Ulae virus True IV single stranded RNA positive sense 1 1 Leviviridae 39683 1 ['CMS001_026_Ra_S18']
Tzifr virus True III double stranded RNA 1 1 Totiviridae 39756 27 ['CMS001_001_Ra_S1'	'CMS001_007_Ra_S12'	'CMS001_010_Ra_S1'	'CMS001_011_Ra_S4'	'CMS001_013_Ra_S5'	'CMS001_015_Ra_S13'	'CMS001_017_Ra_S6'	'CMS001_018_Ra_S14'	'CMS001_019_Ra_S14'	'CMS001_020_Ra_S15'	'CMS001_021_Ra_S16'	'CMS001_022_Ra_S6'	'CMS001_024_Ra_S15'	'CMS001_035_Ra_S20'	'CMS001_037_Ra_S21'	'CMS001_045_Ra_S2'	'CMS001_048_Ra_S5'	'CMS001_049_Ra_S6'	'CMS001_050_Ra_S23'	'CMS001_052_Ra_S7'	'CMS001_053_Ra_S8'	'CMS001_057_Ra_S11'	'CMS001_058_Ra_S9'	'CMS002_047d_Rb_S196_L004'	'CMS002_047g_Rb_S200_L004'	'CMS002_047j_Rb_S3_L004'	'CMS002_053a_Rb_S7_L004']
Pecols virus True IV single stranded RNA positive sense 3 1 Botourmiaviridae 1629669 1 ['CMS002_053a_Rb_S7_L004']
Culex bunyavirus 2 False V single stranded RNA negative sense 3 2 Peribunyaviridae 2304499 30 ['CMS001_002_Ra_S1'	'CMS001_028_Ra_S17'	'CMS001_030_Ra_S7'	'CMS001_032_Ra_S7'	'CMS001_033_Ra_S8'	'CMS001_034_Ra_S19'	'CMS001_036_Ra_S20'	'CMS001_038_Ra_S22'	'CMS001_039_Ra_S9'	'CMS001_041_Ra_S10'	'CMS001_042_Ra_S23'	'CMS001_043_Ra_S24'	'CMS001_044_Ra_S25'	'CMS001_046_Ra_S3'	'CMS001_051_Ra_S8'	'CMS001_059_Ra_S10'	'CMS002_010a_Rb_S119_L004'	'CMS002_013a_Rb_S120_L004'	'CMS002_022a_Rb_S137_L004'	'CMS002_023a_Rb_S138_L004'	'CMS002_027b_Rb_S153_L004'	'CMS002_029a_Rb_S159_L004'	'CMS002_029b_Rb_S160_L004'	'CMS002_029c_Rb_S161_L004'	'CMS002_029d_Rb_S162_L004'	'CMS002_029e_Rb_S164_L004'	'CMS002_035a_Rb_S169_L004'	'CMS002_049a_Rb_S4_L004'	'CMS002_051a_Rb_S6_L004'	'CMS002_057a_Rb_S10_L004']
Culex mosquito virus 4 False V 2 Chuviridae 2304484 6 ['CMS001_044_Ra_S25'	'CMS001_059_Ra_S10'	'CMS002_051a_Rb_S6_L004'	'CMS002_054a_Rb_S8_L004'	'CMS002_056a_Rb_S9_L004'	'CMS002_057a_Rb_S10_L004']
Marma virus False IV single stranded RNA positive sense 1 2 Solemoviridae 2651926 39 ['CMS001_002_Ra_S1'	'CMS001_015_Ra_S13'	'CMS001_021_Ra_S16'	'CMS001_024_Ra_S15'	'CMS001_027_Ra_S16'	'CMS001_028_Ra_S17'	'CMS001_031_Ra_S19'	'CMS001_032_Ra_S7'	'CMS001_033_Ra_S8'	'CMS001_034_Ra_S19'	'CMS001_036_Ra_S20'	'CMS001_038_Ra_S22'	'CMS001_039_Ra_S9'	'CMS001_040_Ra_S21'	'CMS001_042_Ra_S23'	'CMS001_043_Ra_S24'	'CMS001_044_Ra_S25'	'CMS001_046_Ra_S3'	'CMS001_049_Ra_S6'	'CMS001_051_Ra_S8'	'CMS001_053_Ra_S8'	'CMS002_029a_Rb_S159_L004'	'CMS002_029b_Rb_S160_L004'	'CMS002_029c_Rb_S161_L004'	'CMS002_029d_Rb_S162_L004'	'CMS002_029e_Rb_S164_L004'	'CMS002_031a_Rb_S165_L004'	'CMS002_032a_Rb_S166_L004'	'CMS002_033a_Rb_S167_L004'	'CMS002_034a_Rb_S168_L004'	'CMS002_035a_Rb_S169_L004'	'CMS002_036a_Rb_S170_L004'	'CMS002_037a_Rb_S171_L004'	'CMS002_038a_Rb_S172_L004'	'CMS002_039a_Rb_S173_L004'	'CMS002_040a_Rb_S174_L004'	'CMS002_041a_Rb_S176_L004'	'CMS002_051a_Rb_S6_L004'	'CMS002_056a_Rb_S9_L004']
Culex mosquito virus 6 False IV single stranded RNA positive sense 1 2 Solemoviridae 2304486 15 ['CMS001_006_Ra_S5'	'CMS001_017_Ra_S6'	'CMS001_018_Ra_S14'	'CMS001_020_Ra_S15'	'CMS001_021_Ra_S16'	'CMS001_024_Ra_S15'	'CMS001_035_Ra_S20'	'CMS001_048_Ra_S5'	'CMS001_049_Ra_S6'	'CMS001_056_Ra_S10'	'CMS001_057_Ra_S11'	'CMS002_047a_Rb_S193_L004'	'CMS002_047i_Rb_S2_L004'	'CMS002_047j_Rb_S3_L004'	'CMS002_056a_Rb_S9_L004']
Stinn virus True III double stranded RNA 1 1 Totiviridae 39756 2 ['CMS002_029d_Rb_S162_L004'	'CMS002_031a_Rb_S165_L004']
Culex narnavirus 1 False IV single stranded RNA positive sense 1 2 Narnaviridae 2562539 43 ['CMS001_002_Ra_S1'	'CMS001_004_Ra_S2'	'CMS001_011_Ra_S4'	'CMS001_018_Ra_S14'	'CMS001_019_Ra_S14'	'CMS001_022_Ra_S6'	'CMS001_023_Ra_S17'	'CMS001_028_Ra_S17'	'CMS001_029_Ra_S18'	'CMS001_030_Ra_S7'	'CMS001_034_Ra_S19'	'CMS001_035_Ra_S20'	'CMS001_036_Ra_S20'	'CMS001_037_Ra_S21'	'CMS001_038_Ra_S22'	'CMS001_040_Ra_S21'	'CMS001_041_Ra_S10'	'CMS001_042_Ra_S23'	'CMS001_044_Ra_S25'	'CMS001_045_Ra_S2'	'CMS001_047_Ra_S4'	'CMS001_048_Ra_S5'	'CMS001_051_Ra_S8'	'CMS001_052_Ra_S7'	'CMS001_054_Ra_S11'	'CMS001_058_Ra_S9'	'CMS001_059_Ra_S10'	'CMS002_001a_Rb_S116_L004'	'CMS002_022a_Rb_S137_L004'	'CMS002_023a_Rb_S138_L004'	'CMS002_027a_Rb_S152_L004'	'CMS002_027b_Rb_S153_L004'	'CMS002_028d_Rb_S157_L004'	'CMS002_028e_Rb_S158_L004'	'CMS002_029c_Rb_S161_L004'	'CMS002_029d_Rb_S162_L004'	'CMS002_046a_Rb_S191_L004'	'CMS002_046b_Rb_S192_L004'	'CMS002_047a_Rb_S193_L004'	'CMS002_047f_Rb_S198_L004'	'CMS002_047j_Rb_S3_L004'	'CMS002_051a_Rb_S6_L004'	'CMS002_053a_Rb_S7_L004']
Aedes anphevirus False V single stranded RNA negative sense 1 1 Xinmoviridae 2230910 2 ['CMS002_017c_Rb_S124_L004'	'CMS002_018a_Rb_S128_L004']
Guadeloupe Culex tymo-like virus False IV single stranded RNA positive sense 1 1 Tymoviridae 2607736 1 ['CMS002_022a_Rb_S137_L004']
Guadeloupe mosquito virus False IV single stranded RNA positive sense 1 2 Solemoviridae 2607735 8 ['CMS002_017a_Rb_S122_L004'	'CMS002_017b_Rb_S123_L004'	'CMS002_017c_Rb_S124_L004'	'CMS002_017d_Rb_S125_L004'	'CMS002_017e_Rb_S126_L004'	'CMS002_018a_Rb_S128_L004'	'CMS002_018b_Rb_S129_L004'	'CMS002_019a_Rb_S130_L004']
Gissa virus True III double stranded RNA 1 1 Totiviridae 39756 1 ['CMS001_009_Ra_S13']
Kellev virus True IV single stranded RNA positive sense 1 2 Solemoviridae 502177 2 ['CMS002_020a_Rb_S131_L004'	'CMS002_020b_Rb_S132_L004']
Lotchka virus True III double stranded RNA 1 1 Totiviridae 39756 19 ['CMS001_006_Ra_S5'	'CMS001_007_Ra_S12'	'CMS001_010_Ra_S1'	'CMS001_013_Ra_S5'	'CMS001_018_Ra_S14'	'CMS001_019_Ra_S14'	'CMS001_020_Ra_S15'	'CMS001_021_Ra_S16'	'CMS001_035_Ra_S20'	'CMS001_037_Ra_S21'	'CMS001_049_Ra_S6'	'CMS001_050_Ra_S23'	'CMS001_052_Ra_S7'	'CMS001_053_Ra_S8'	'CMS001_057_Ra_S11'	'CMS001_058_Ra_S9'	'CMS002_028b_Rb_S155_L004'	'CMS002_047e_Rb_S197_L004'	'CMS002_053a_Rb_S7_L004']
Mika virus True III double stranded RNA 1 1 Totiviridae 39756 10 ['CMS001_027_Ra_S16'	'CMS001_028_Ra_S17'	'CMS001_032_Ra_S7'	'CMS001_034_Ra_S19'	'CMS001_036_Ra_S20'	'CMS001_038_Ra_S22'	'CMS002_029a_Rb_S159_L004'	'CMS002_029b_Rb_S160_L004'	'CMS002_029c_Rb_S161_L004'	'CMS002_029e_Rb_S164_L004']
Wenzhou sobemo-like virus 4 False IV single stranded RNA positive sense 1 2 Solemoviridae 1923660 7 ['CMS002_045a_Rb_S183_L004'	'CMS002_045b_Rb_S184_L004'	'CMS002_045c_Rb_S185_L004'	'CMS002_045d_Rb_S186_L004'	'CMS002_045e_Rb_S188_L004'	'CMS002_045f_Rb_S189_L004'	'CMS002_045g_Rb_S190_L004']
Gouley virus True III double stranded RNA 1 1 Totiviridae 39756 4 ['CMS001_031_Ra_S19'	'CMS002_029d_Rb_S162_L004'	'CMS002_031a_Rb_S165_L004'	'CMS002_040a_Rb_S174_L004']
Gordis virus True V single stranded RNA negative sense 1 1 Xinmoviridae 2059674 9 ['CMS001_003_Ra_S2'	'CMS001_008_Ra_S3'	'CMS001_025_Ra_S7'	'CMS002_020a_Rb_S131_L004'	'CMS002_020b_Rb_S132_L004'	'CMS002_020c_Rb_S133_L004'	'CMS002_020d_Rb_S134_L004'	'CMS002_020e_Rb_S135_L004'	'CMS002_021a_Rb_S136_L004']
Wuhan insect virus 33 False IV single stranded RNA positive sense 1 1 Dicistroviridae 1923736 3 ['CMS002_044a_Rb_S178_L004'	'CMS002_044b_Rb_S179_L004'	'CMS002_044c_Rb_S180_L004']
Udune virus True V single stranded RNA negative sense 3 3 Peribunyaviridae 348018 1 ['CMS001_040_Ra_S21']
Niwlog virus True V single stranded RNA negative sense 3 3 Phenuiviridae 2024603 8 ['CMS001_011_Ra_S4'	'CMS001_013_Ra_S5'	'CMS001_019_Ra_S14'	'CMS001_021_Ra_S16'	'CMS001_048_Ra_S5'	'CMS001_049_Ra_S6'	'CMS001_056_Ra_S10'	'CMS002_053a_Rb_S7_L004']
Hagerguy virus True III double stranded RNA 1 2 Totiviridae 39756 2 ['CMS002_020b_Rb_S132_L004'	'CMS002_021a_Rb_S136_L004']
Dumanli virus True V single stranded RNA negative sense 3 1 Peribunyaviridae 39718 1 ['CMS001_001_Ra_S1']
Barstukas virus True V single stranded RNA negative sense 3 3 Phasmaviridae 2546221 16 ['CMS002_026a_Rb_S146_L004'	'CMS002_026b_Rb_S147_L004'	'CMS002_026c_Rb_S148_L004'	'CMS002_026d_Rb_S149_L004'	'CMS002_026e_Rb_S150_L004'	'CMS002_044a_Rb_S178_L004'	'CMS002_044c_Rb_S180_L004'	'CMS002_044d_Rb_S181_L004'	'CMS002_044e_Rb_S182_L004'	'CMS002_045a_Rb_S183_L004'	'CMS002_045b_Rb_S184_L004'	'CMS002_045c_Rb_S185_L004'	'CMS002_045d_Rb_S186_L004'	'CMS002_045e_Rb_S188_L004'	'CMS002_045f_Rb_S189_L004'	'CMS002_045g_Rb_S190_L004']
Culex-associated Luteo-like virus False IV single stranded RNA positive sense 1 2 Luteoviridae 2304522 7 ['CMS002_029e_Rb_S164_L004'	'CMS002_031a_Rb_S165_L004'	'CMS002_032a_Rb_S166_L004'	'CMS002_035a_Rb_S169_L004'	'CMS002_038a_Rb_S172_L004'	'CMS002_040a_Rb_S174_L004'	'CMS002_041a_Rb_S176_L004']
Miglotas virus True V single stranded RNA negative sense 3 3 Phasmaviridae 2546221 16 ['CMS001_001_Ra_S1'	'CMS001_011_Ra_S4'	'CMS001_017_Ra_S6'	'CMS001_018_Ra_S14'	'CMS001_019_Ra_S14'	'CMS001_035_Ra_S20'	'CMS001_037_Ra_S21'	'CMS001_057_Ra_S11'	'CMS002_028b_Rb_S155_L004'	'CMS002_028d_Rb_S157_L004'	'CMS002_028e_Rb_S158_L004'	'CMS002_047f_Rb_S198_L004'	'CMS002_047h_Rb_S1_L004'	'CMS002_047i_Rb_S2_L004'	'CMS002_047j_Rb_S3_L004'	'CMS002_053a_Rb_S7_L004']
Totivirus-like Culex mosquito virus 1 False III double stranded RNA 1 1 Totiviridae 2304495 1 ['CMS001_038_Ra_S22']
Merida virus False V single stranded RNA negative sense 1 1 Rhabdoviridae 1803034 9 ['CMS002_031a_Rb_S165_L004'	'CMS002_035a_Rb_S169_L004'	'CMS002_038a_Rb_S172_L004'	'CMS002_040a_Rb_S174_L004'	'CMS002_041a_Rb_S176_L004'	'CMS002_044a_Rb_S178_L004'	'CMS002_044b_Rb_S179_L004'	'CMS002_044d_Rb_S181_L004'	'CMS002_044e_Rb_S182_L004']
Aedes aegypti totivirus False III double stranded RNA 1 2 Totiviridae 2603435 5 ['CMS002_017a_Rb_S122_L004'	'CMS002_017b_Rb_S123_L004'	'CMS002_017c_Rb_S124_L004'	'CMS002_017d_Rb_S125_L004'	'CMS002_017e_Rb_S126_L004']
Vai augu virus True IV single stranded RNA positive sense 1 or 2 1 Tombusviridae 137555 2 ['CMS001_001_Ra_S1'	'CMS001_022_Ra_S6']
Hubei virga-like virus 2 False IV single stranded RNA positive sense 1 or more 1 Virgaviridae 1923335 36 ['CMS001_001_Ra_S1'	'CMS001_002_Ra_S1'	'CMS001_006_Ra_S5'	'CMS001_010_Ra_S1'	'CMS001_015_Ra_S13'	'CMS001_017_Ra_S6'	'CMS001_018_Ra_S14'	'CMS001_019_Ra_S14'	'CMS001_020_Ra_S15'	'CMS001_021_Ra_S16'	'CMS001_022_Ra_S6'	'CMS001_023_Ra_S17'	'CMS001_024_Ra_S15'	'CMS001_034_Ra_S19'	'CMS001_035_Ra_S20'	'CMS001_037_Ra_S21'	'CMS001_045_Ra_S2'	'CMS001_048_Ra_S5'	'CMS001_049_Ra_S6'	'CMS001_050_Ra_S23'	'CMS001_052_Ra_S7'	'CMS001_053_Ra_S8'	'CMS001_056_Ra_S10'	'CMS001_057_Ra_S11'	'CMS001_058_Ra_S9'	'CMS002_028a_Rb_S154_L004'	'CMS002_028c_Rb_S156_L004'	'CMS002_029d_Rb_S162_L004'	'CMS002_029e_Rb_S164_L004'	'CMS002_047b_Rb_S194_L004'	'CMS002_047d_Rb_S196_L004'	'CMS002_047e_Rb_S197_L004'	'CMS002_047f_Rb_S198_L004'	'CMS002_047g_Rb_S200_L004'	'CMS002_047i_Rb_S2_L004'	'CMS002_053a_Rb_S7_L004']
Patulas virus True IV single stranded RNA positive sense 3 1 Botourmiaviridae 2587553 1 ['CMS002_053a_Rb_S7_L004']
Geolu virus True IV single stranded RNA positive sense 1 1 Luteoviridae 328429 1 ['CMS001_060_Ra_S12']
