# Supplementary figures and images for: Single mosquito metatranscriptomics identifies vectors, emerging pathogens and reservoirs in one assay
Source: eLife journal article supplement (doi:10.7554/elife.68353), 2021-04-27

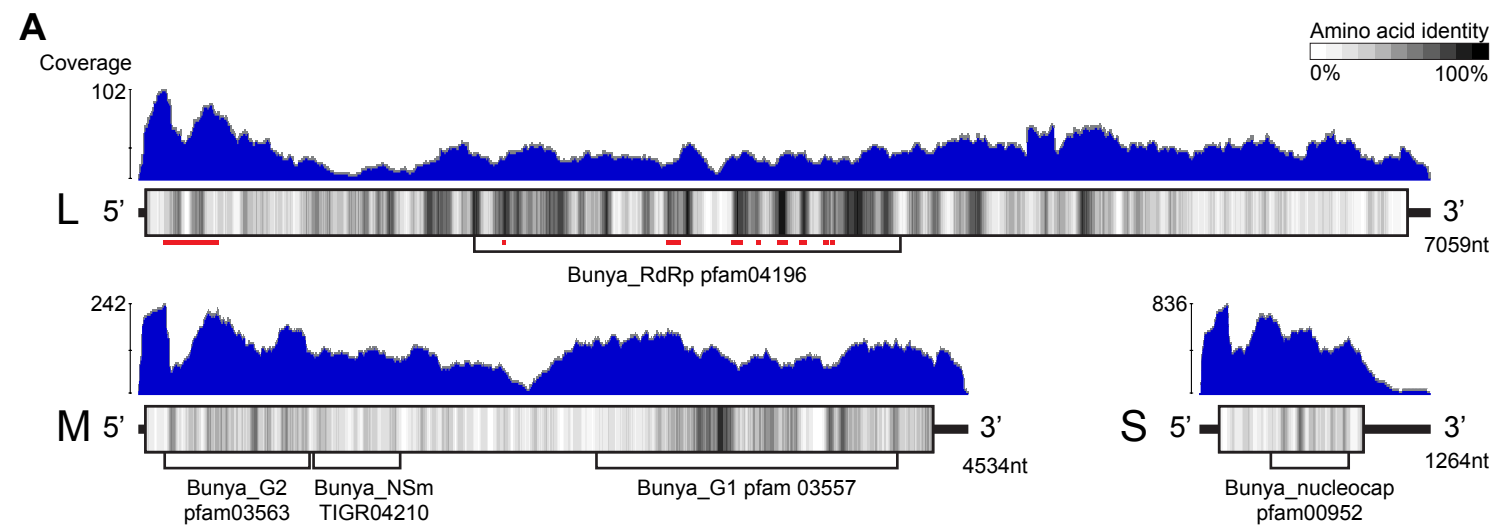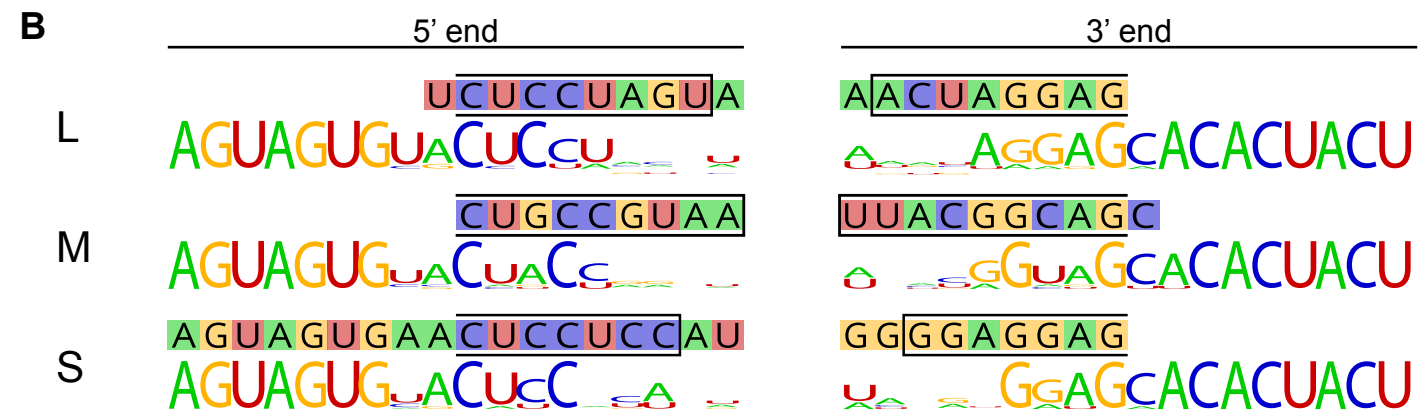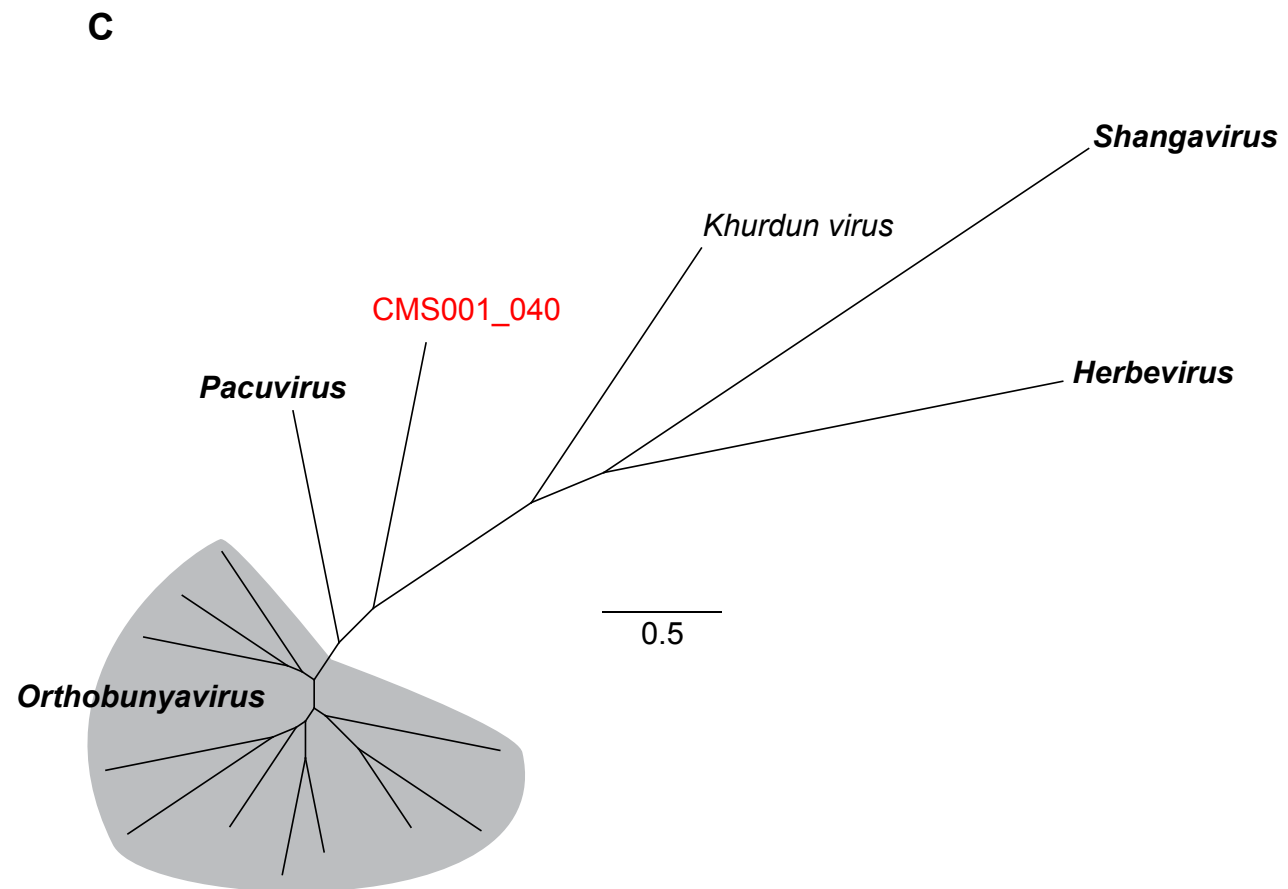

Supplement: supp [file elife-68353-supp-v1.zip]

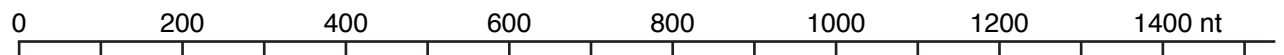

### A) gp64

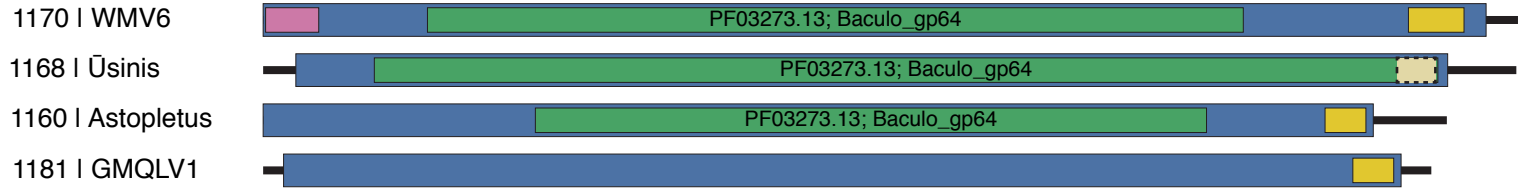

### B) hypothetical1

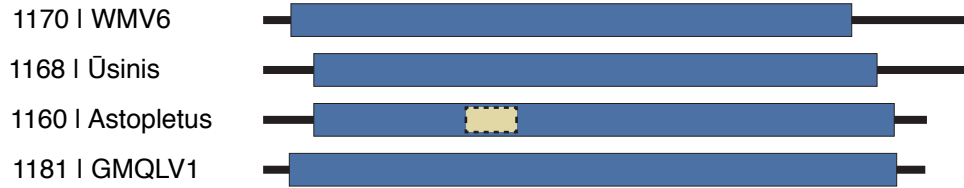

### C) hypothetical2

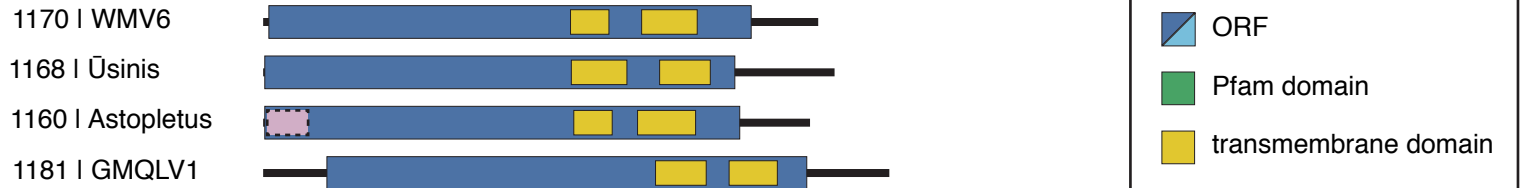

### D) hypothetical3

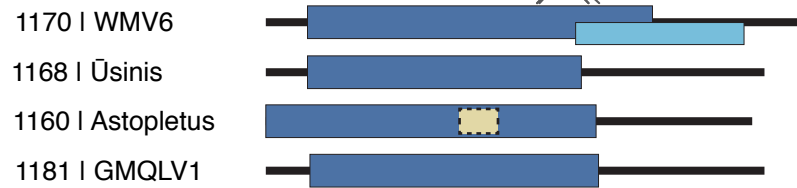

### E) Culex narnavirus 1

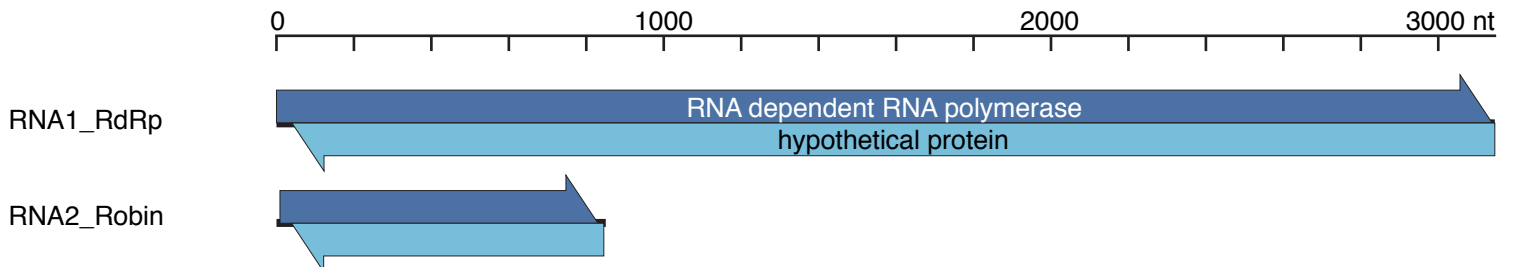

Supplement: supp [file elife-68353-supp-v1.zip]

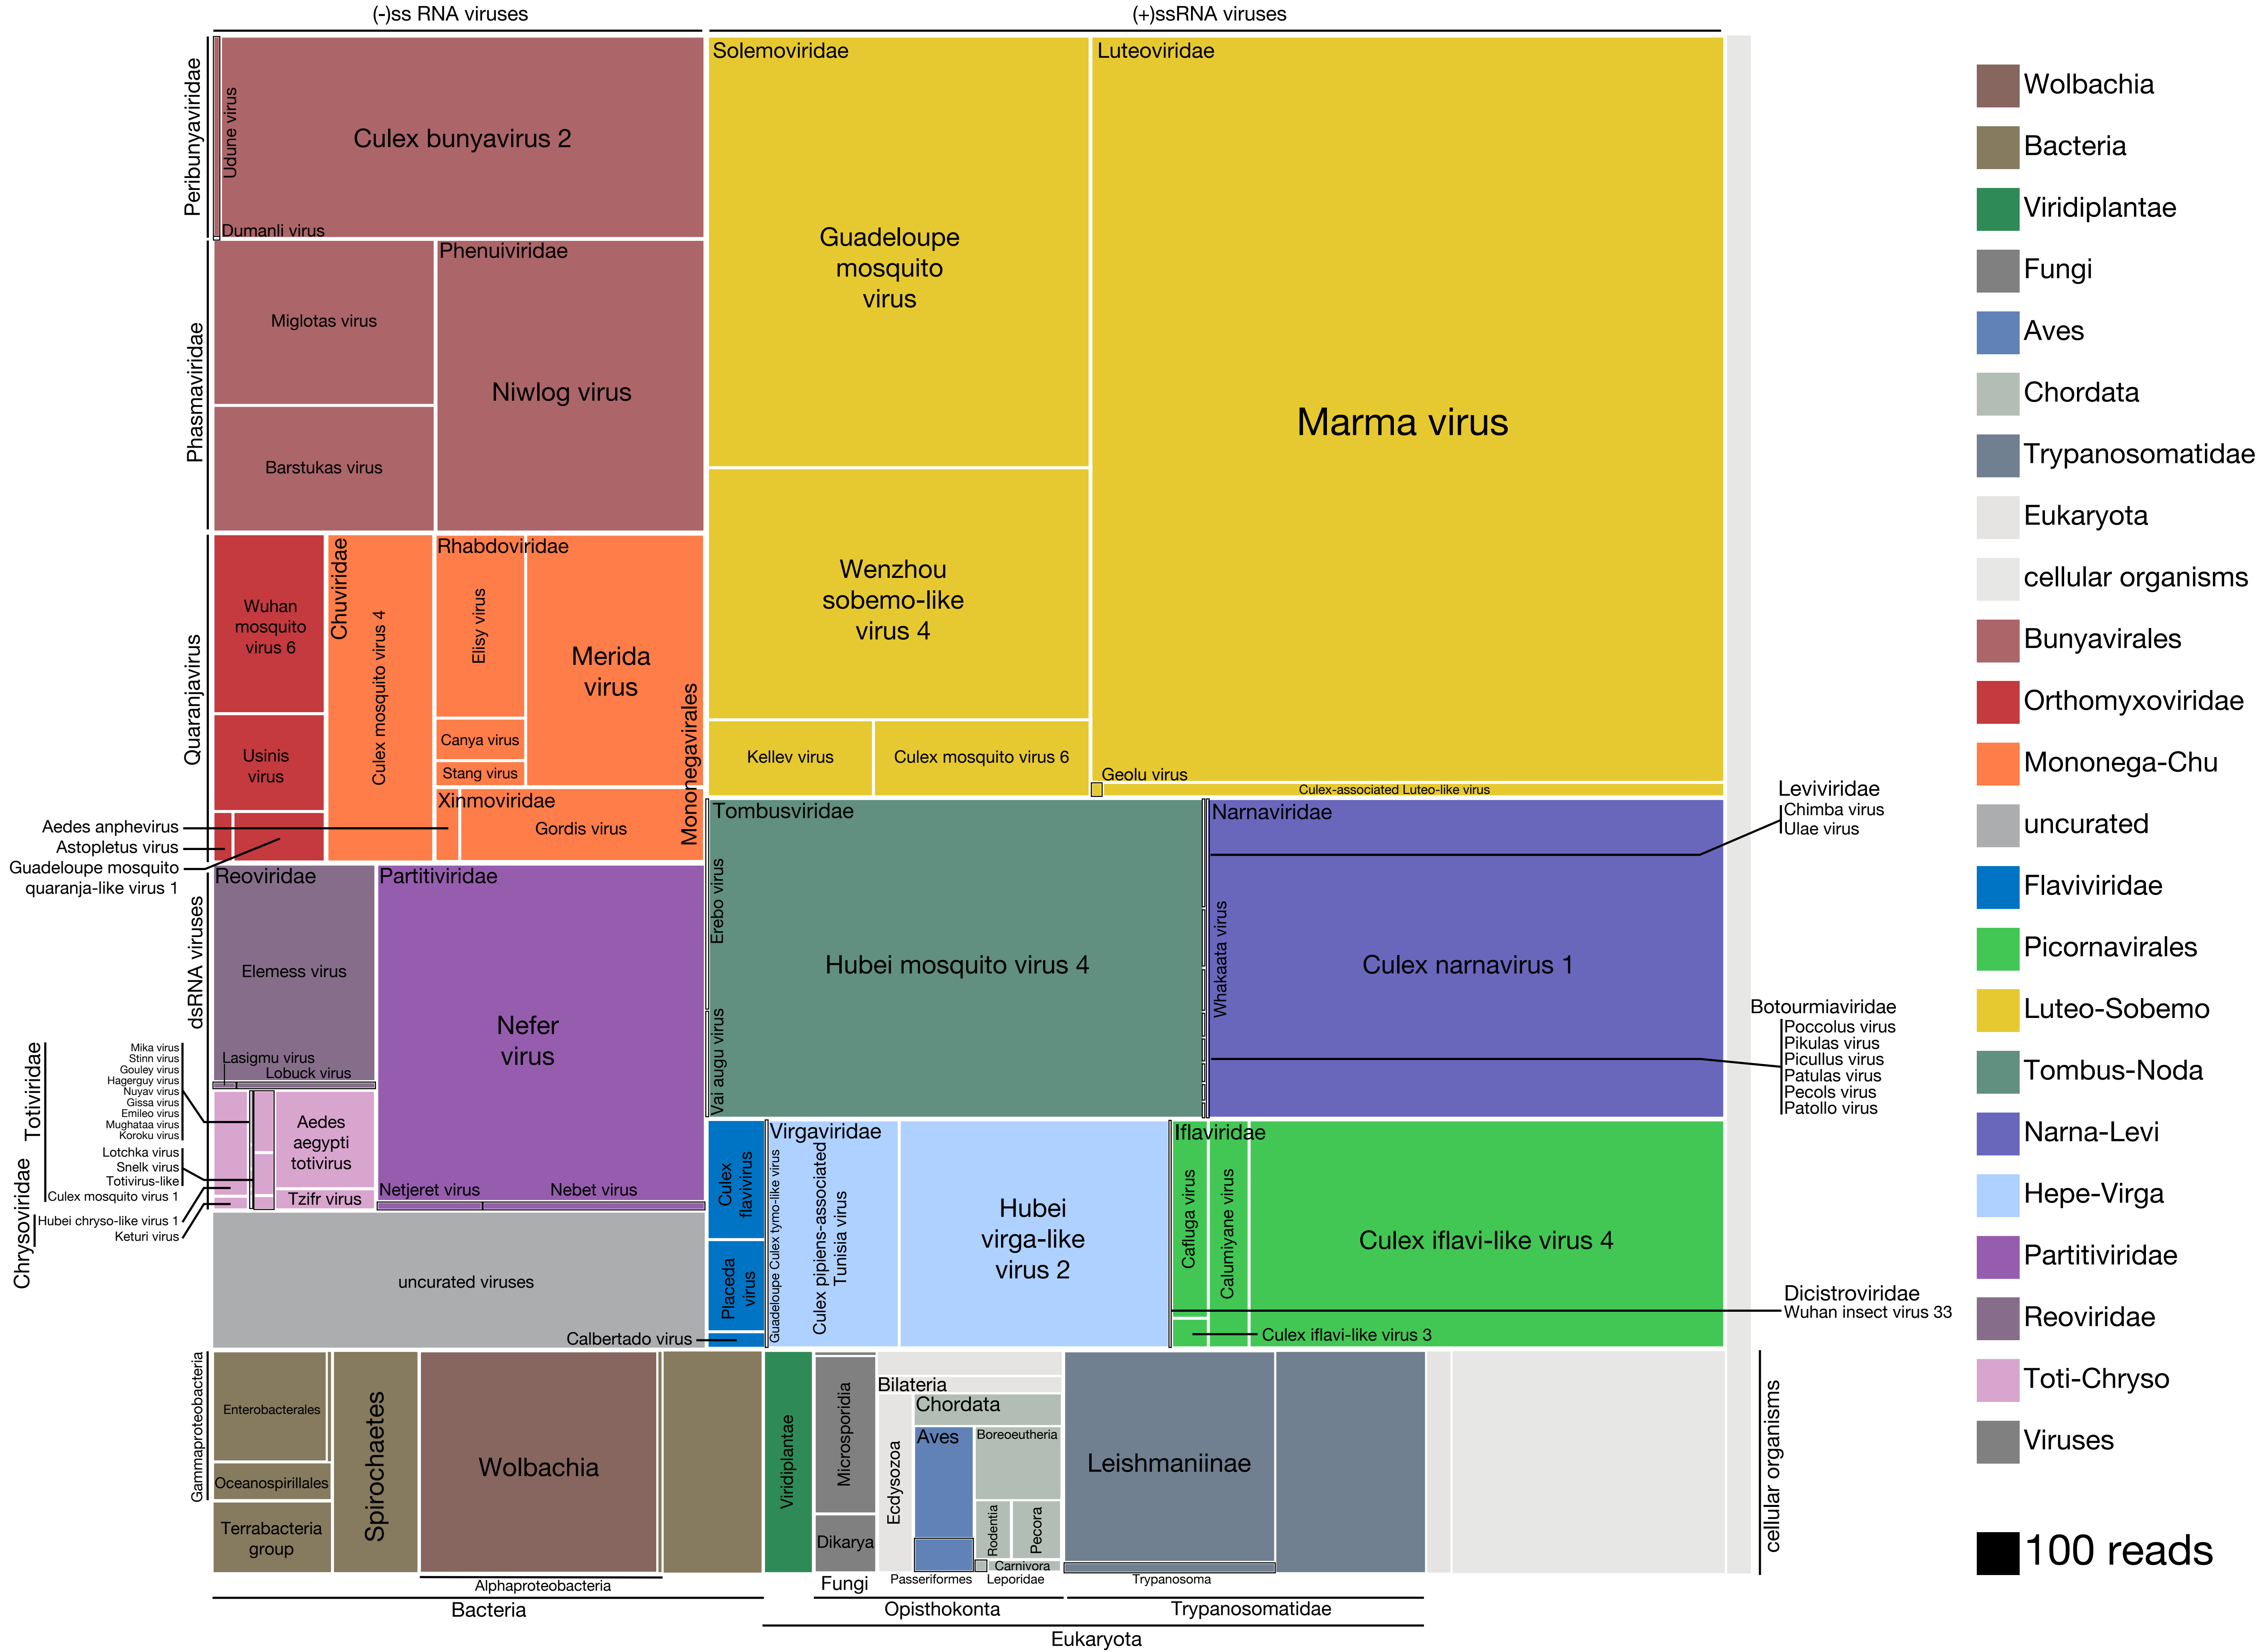

Supplement: supp [file elife-68353-supp-v1.zip]

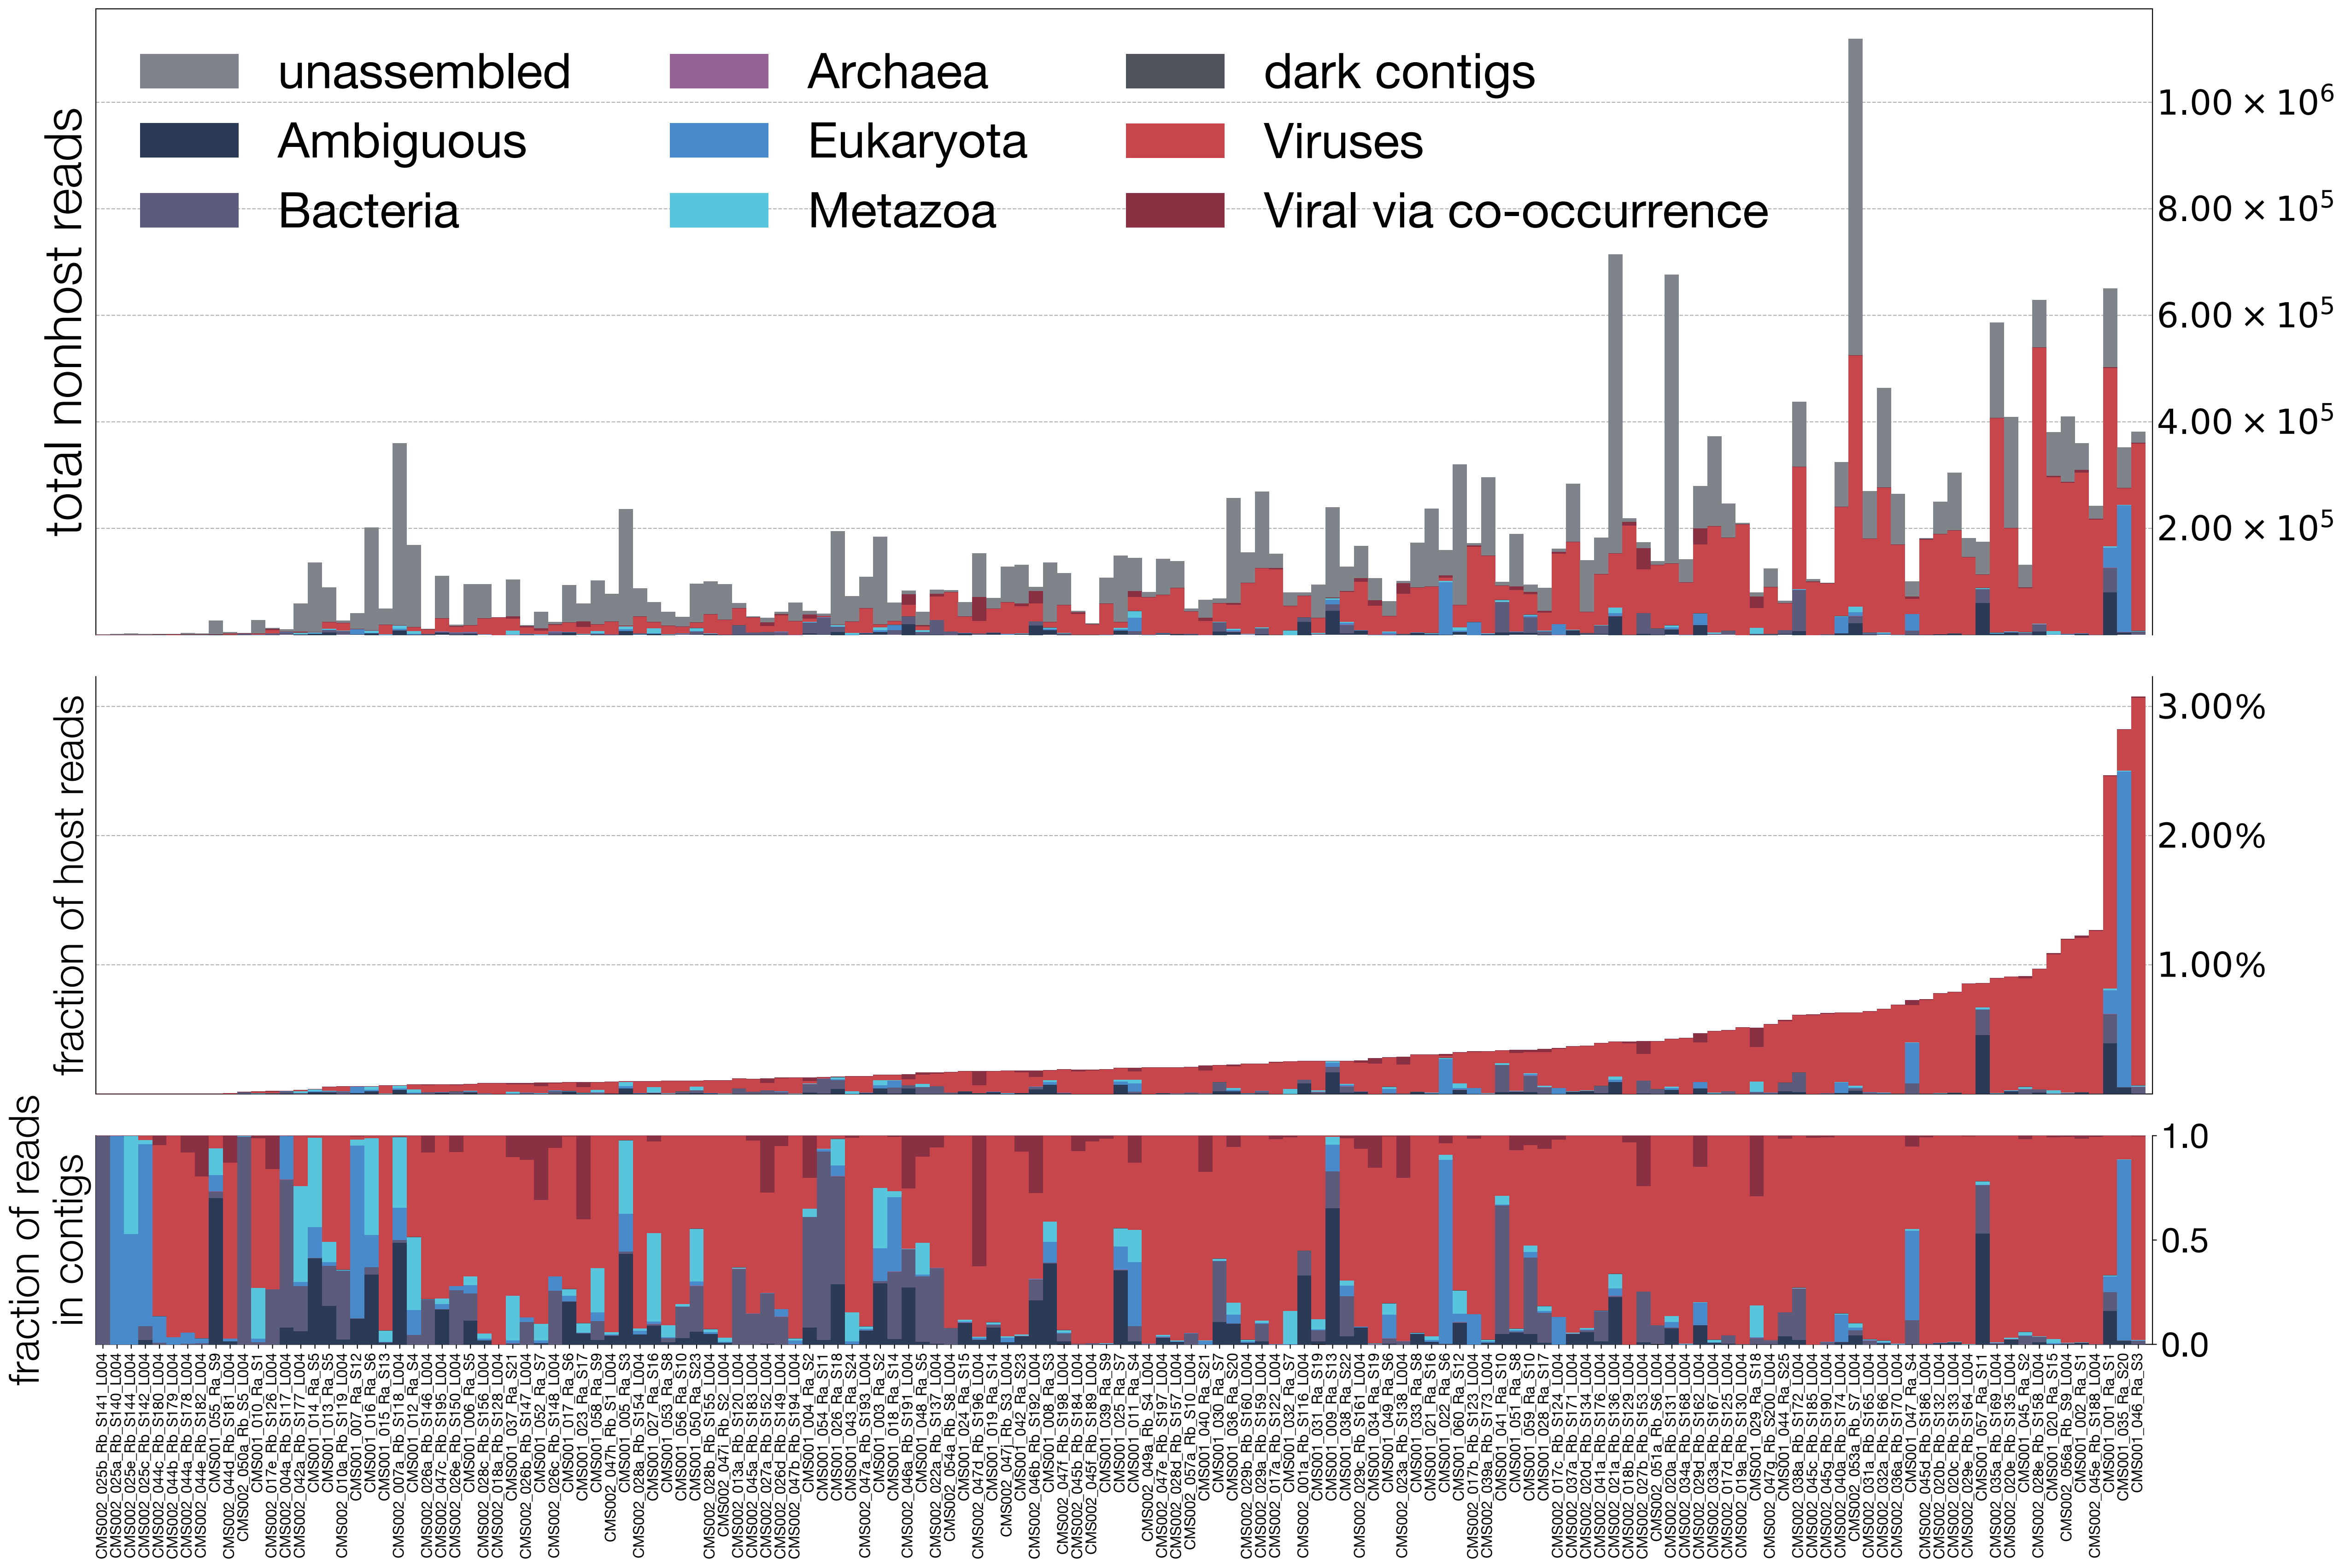

Supplement: supp [file elife-68353-supp-v1.zip]

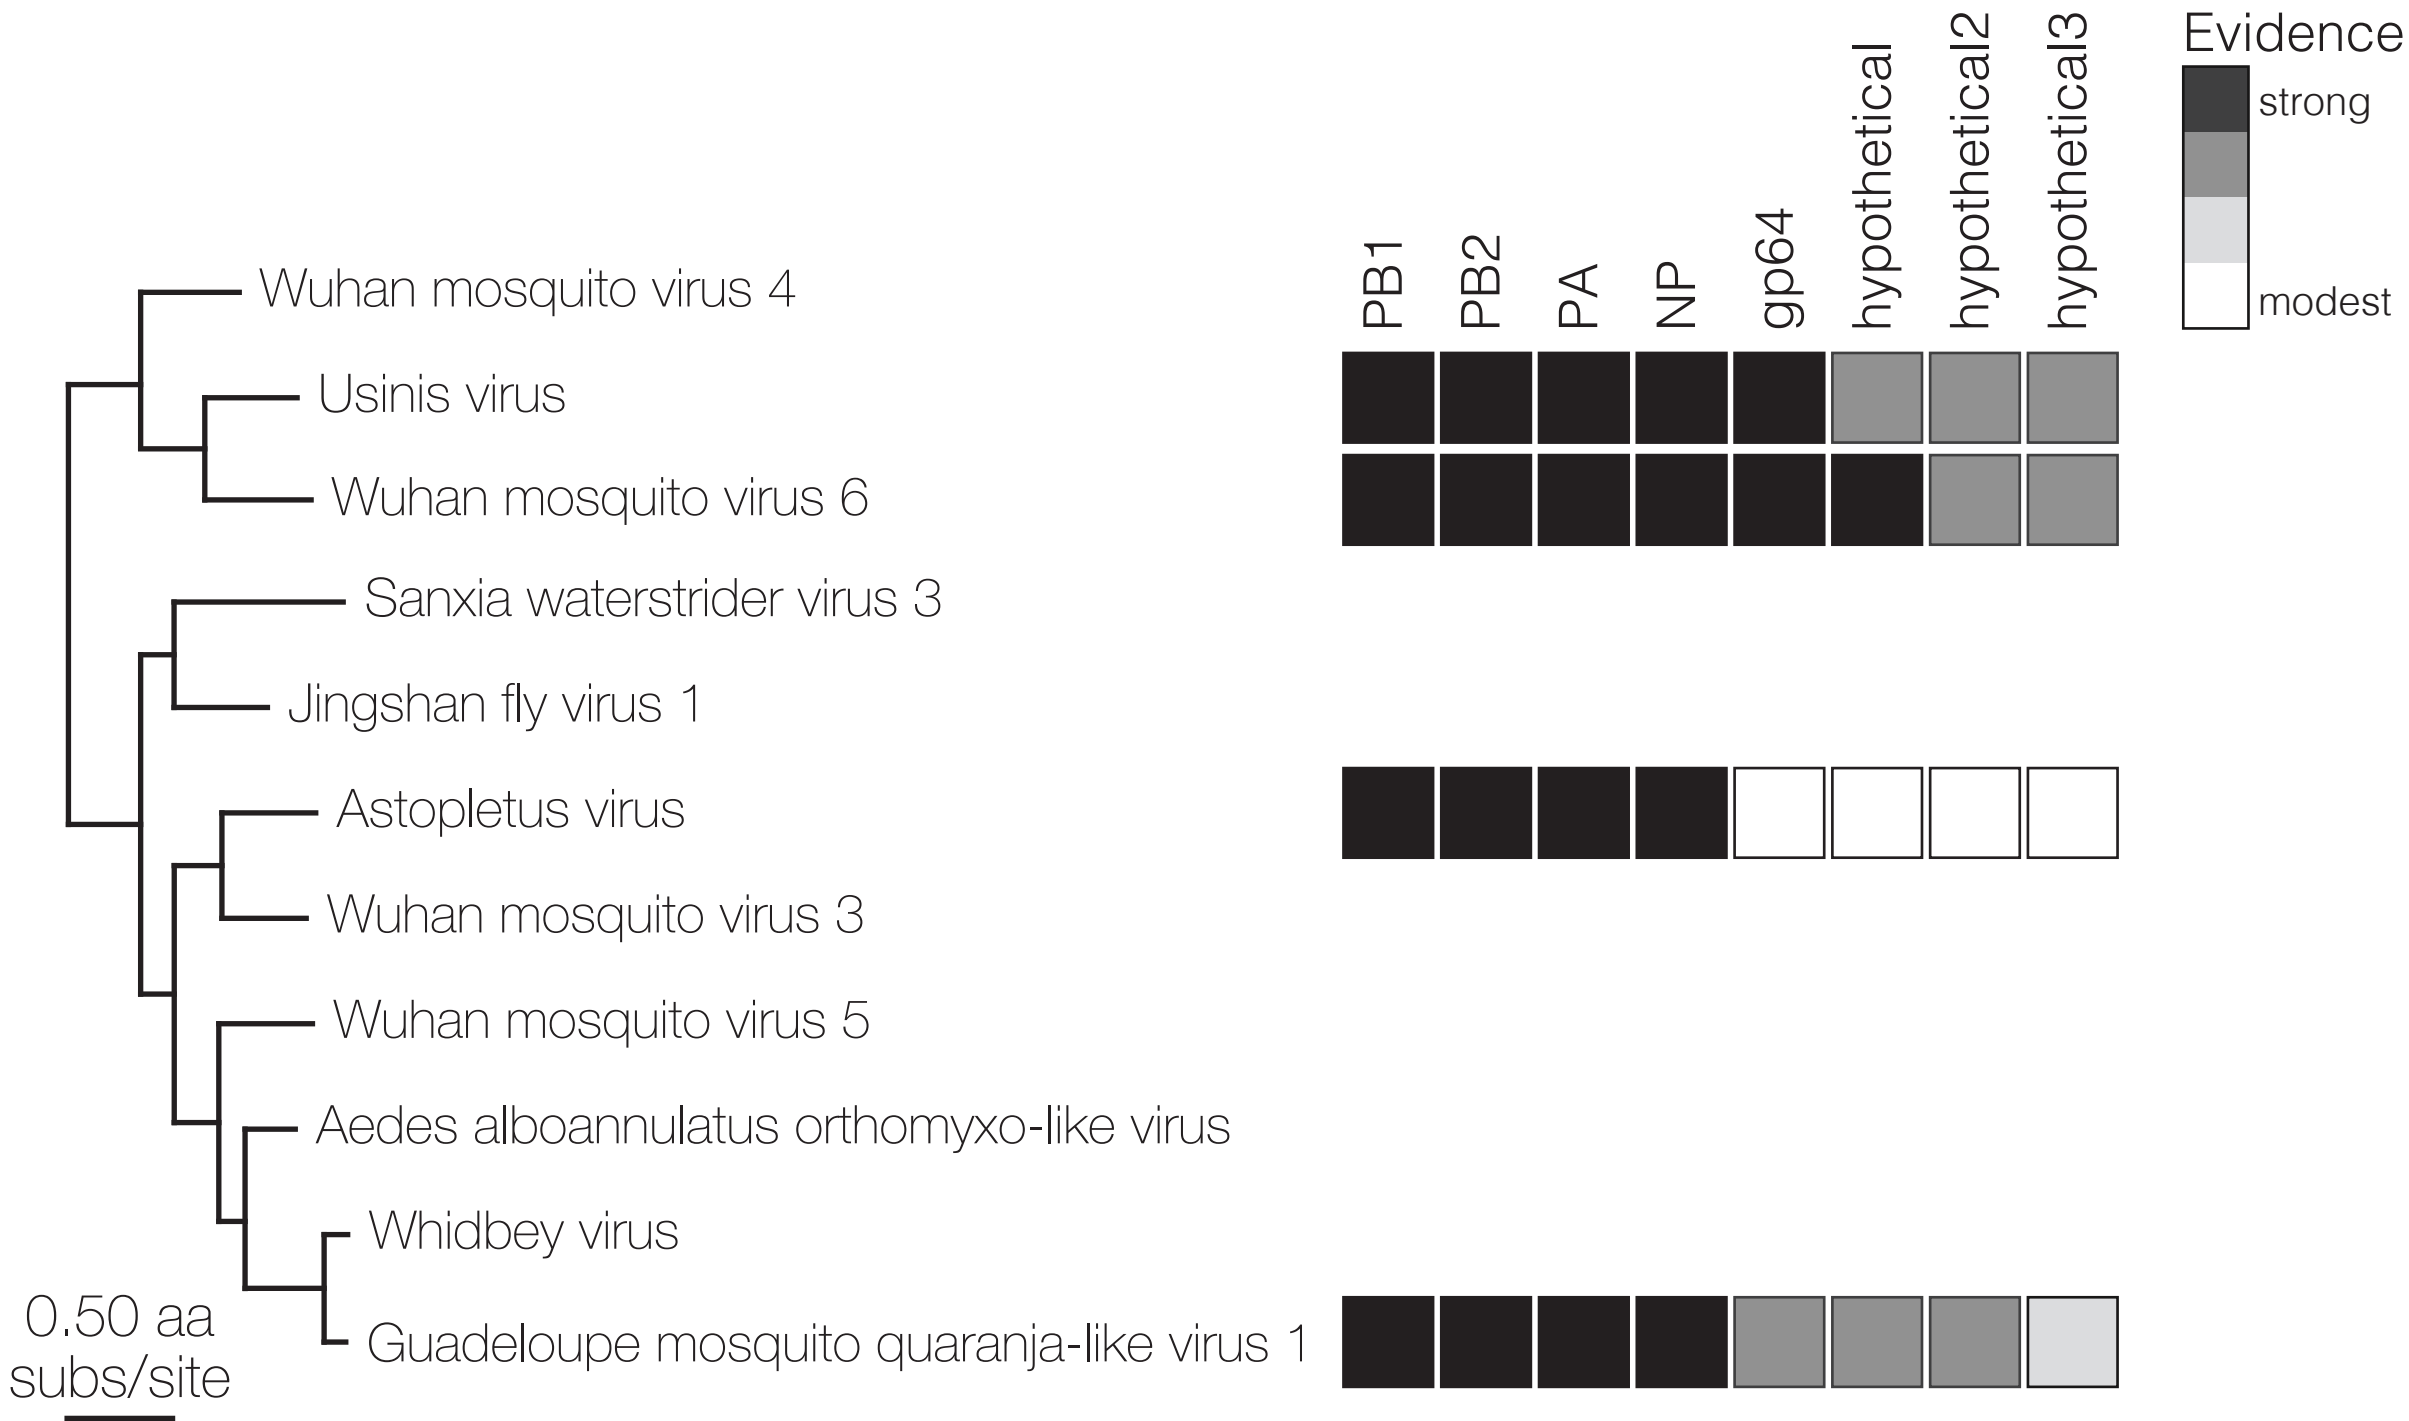

Supplement: supp [file elife-68353-supp-v1.zip]

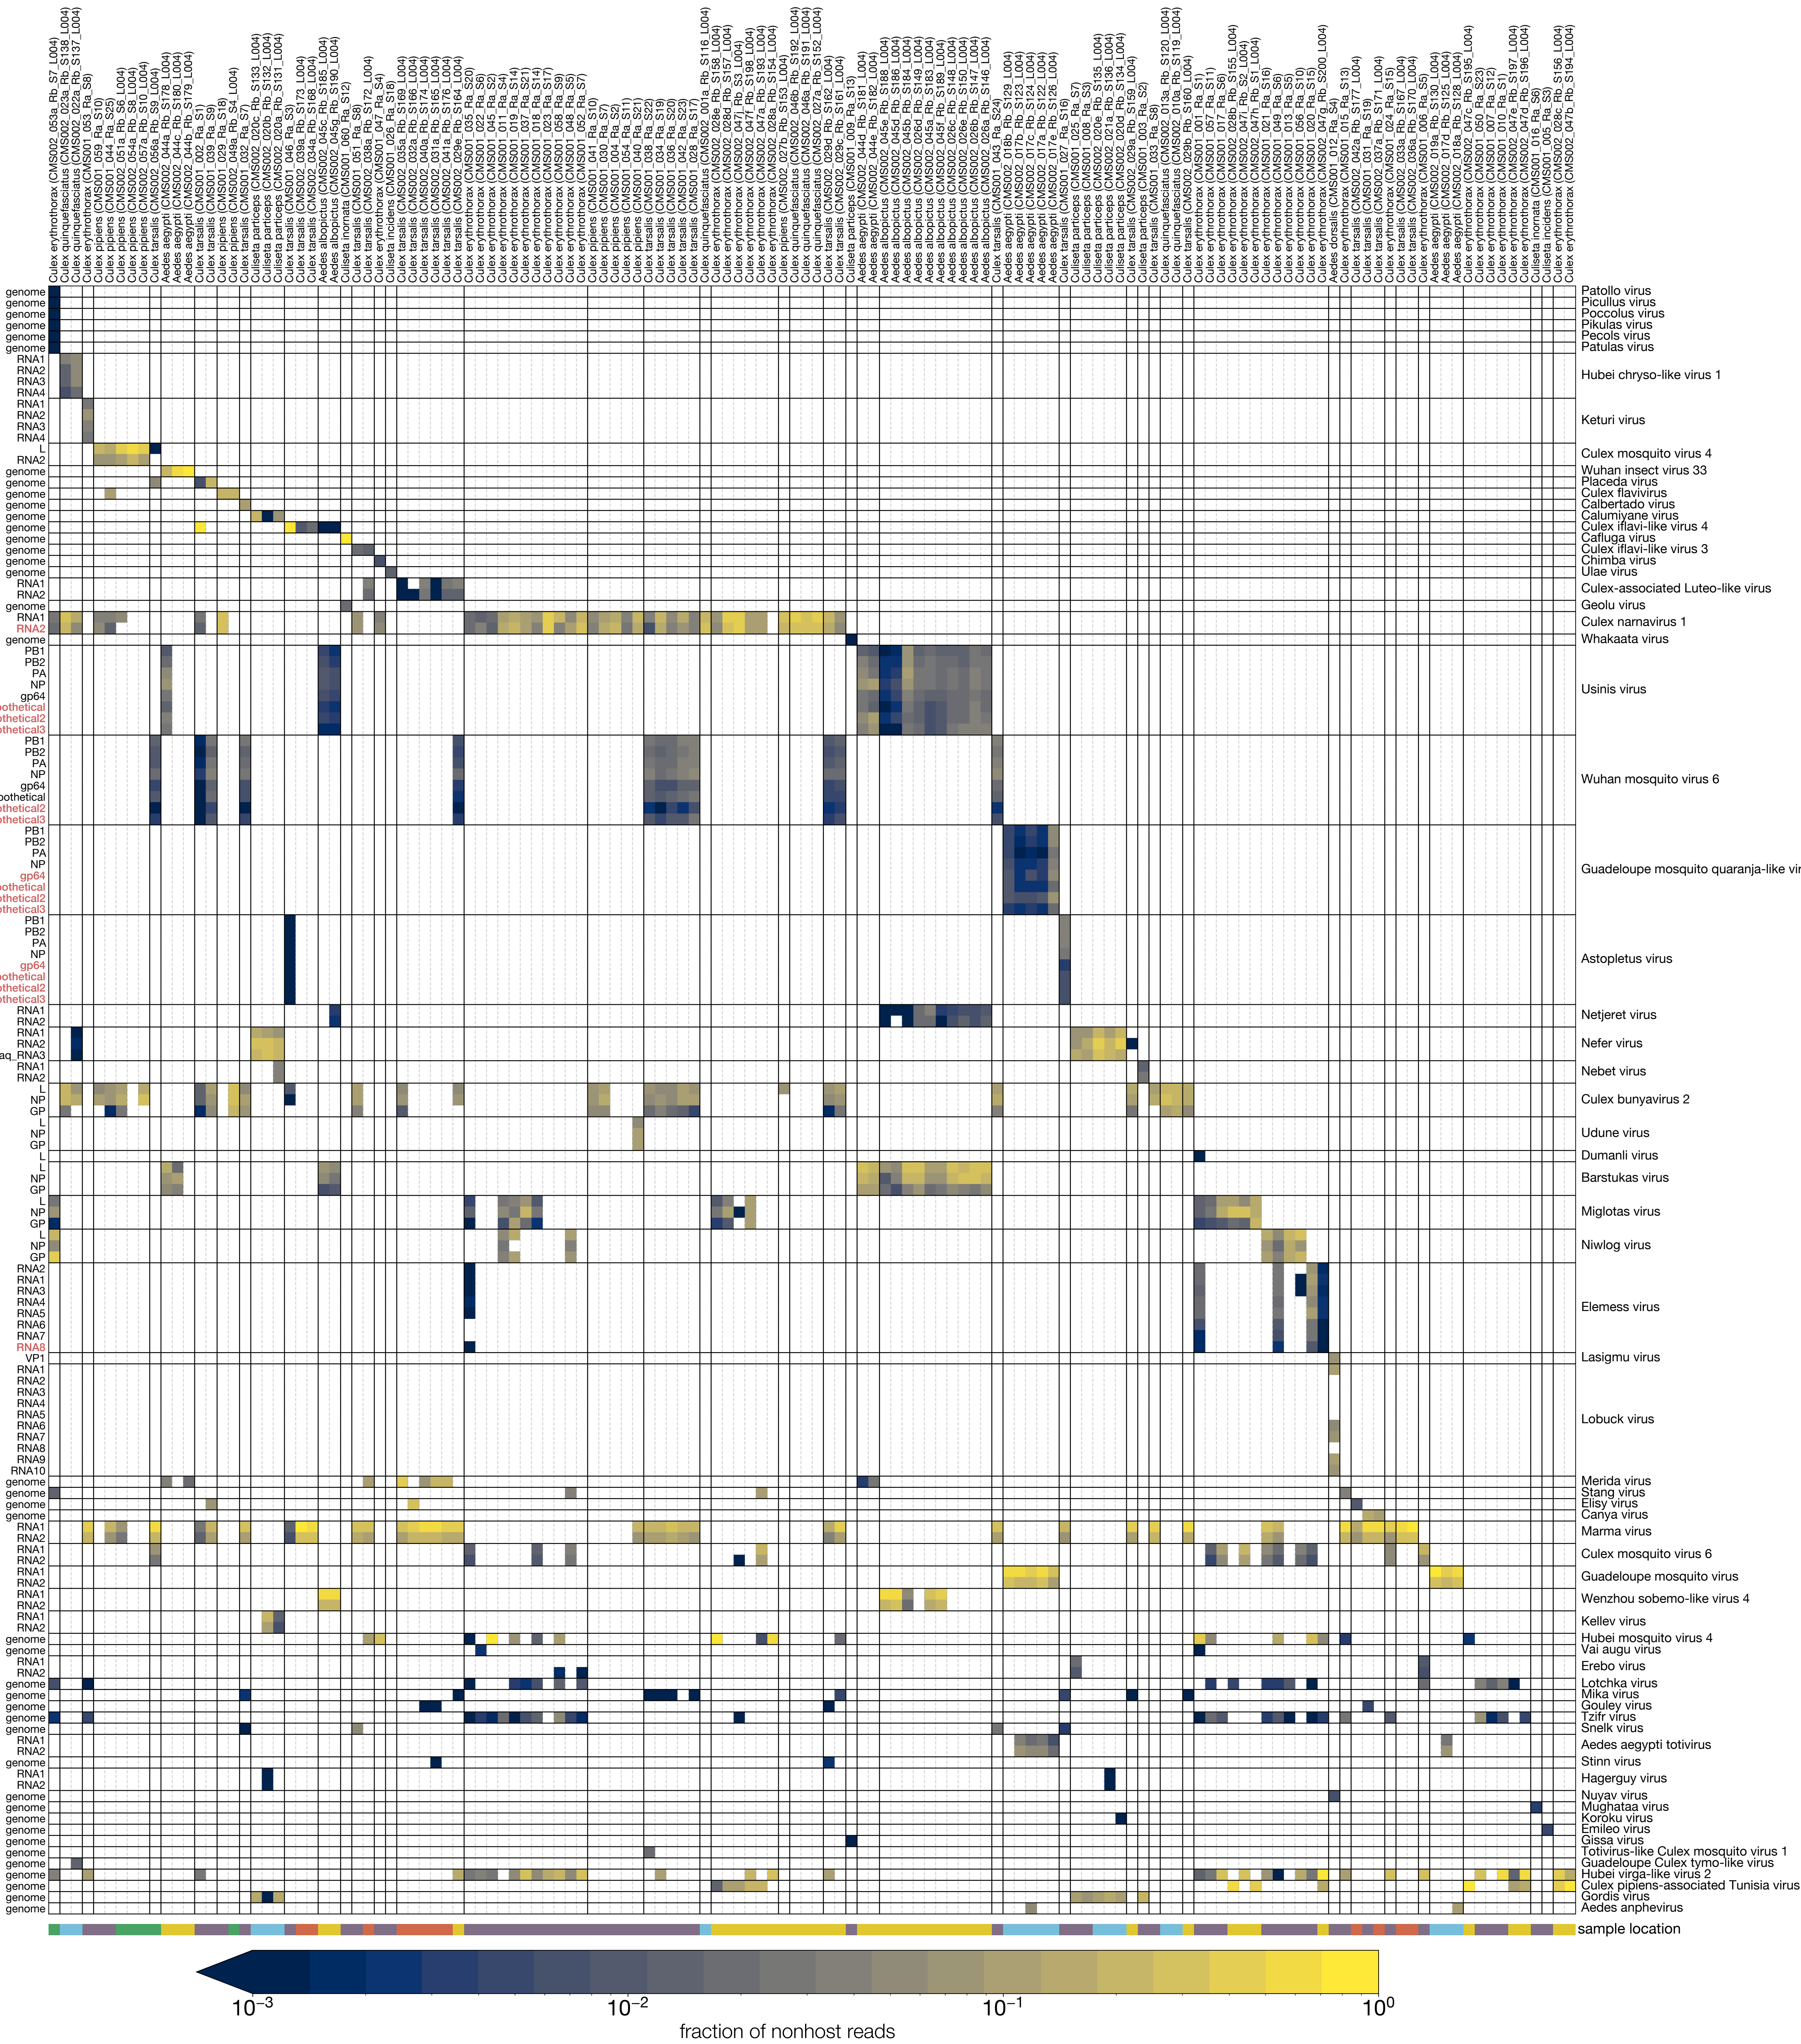

Supplement: supp [file elife-68353-supp-v1.zip]

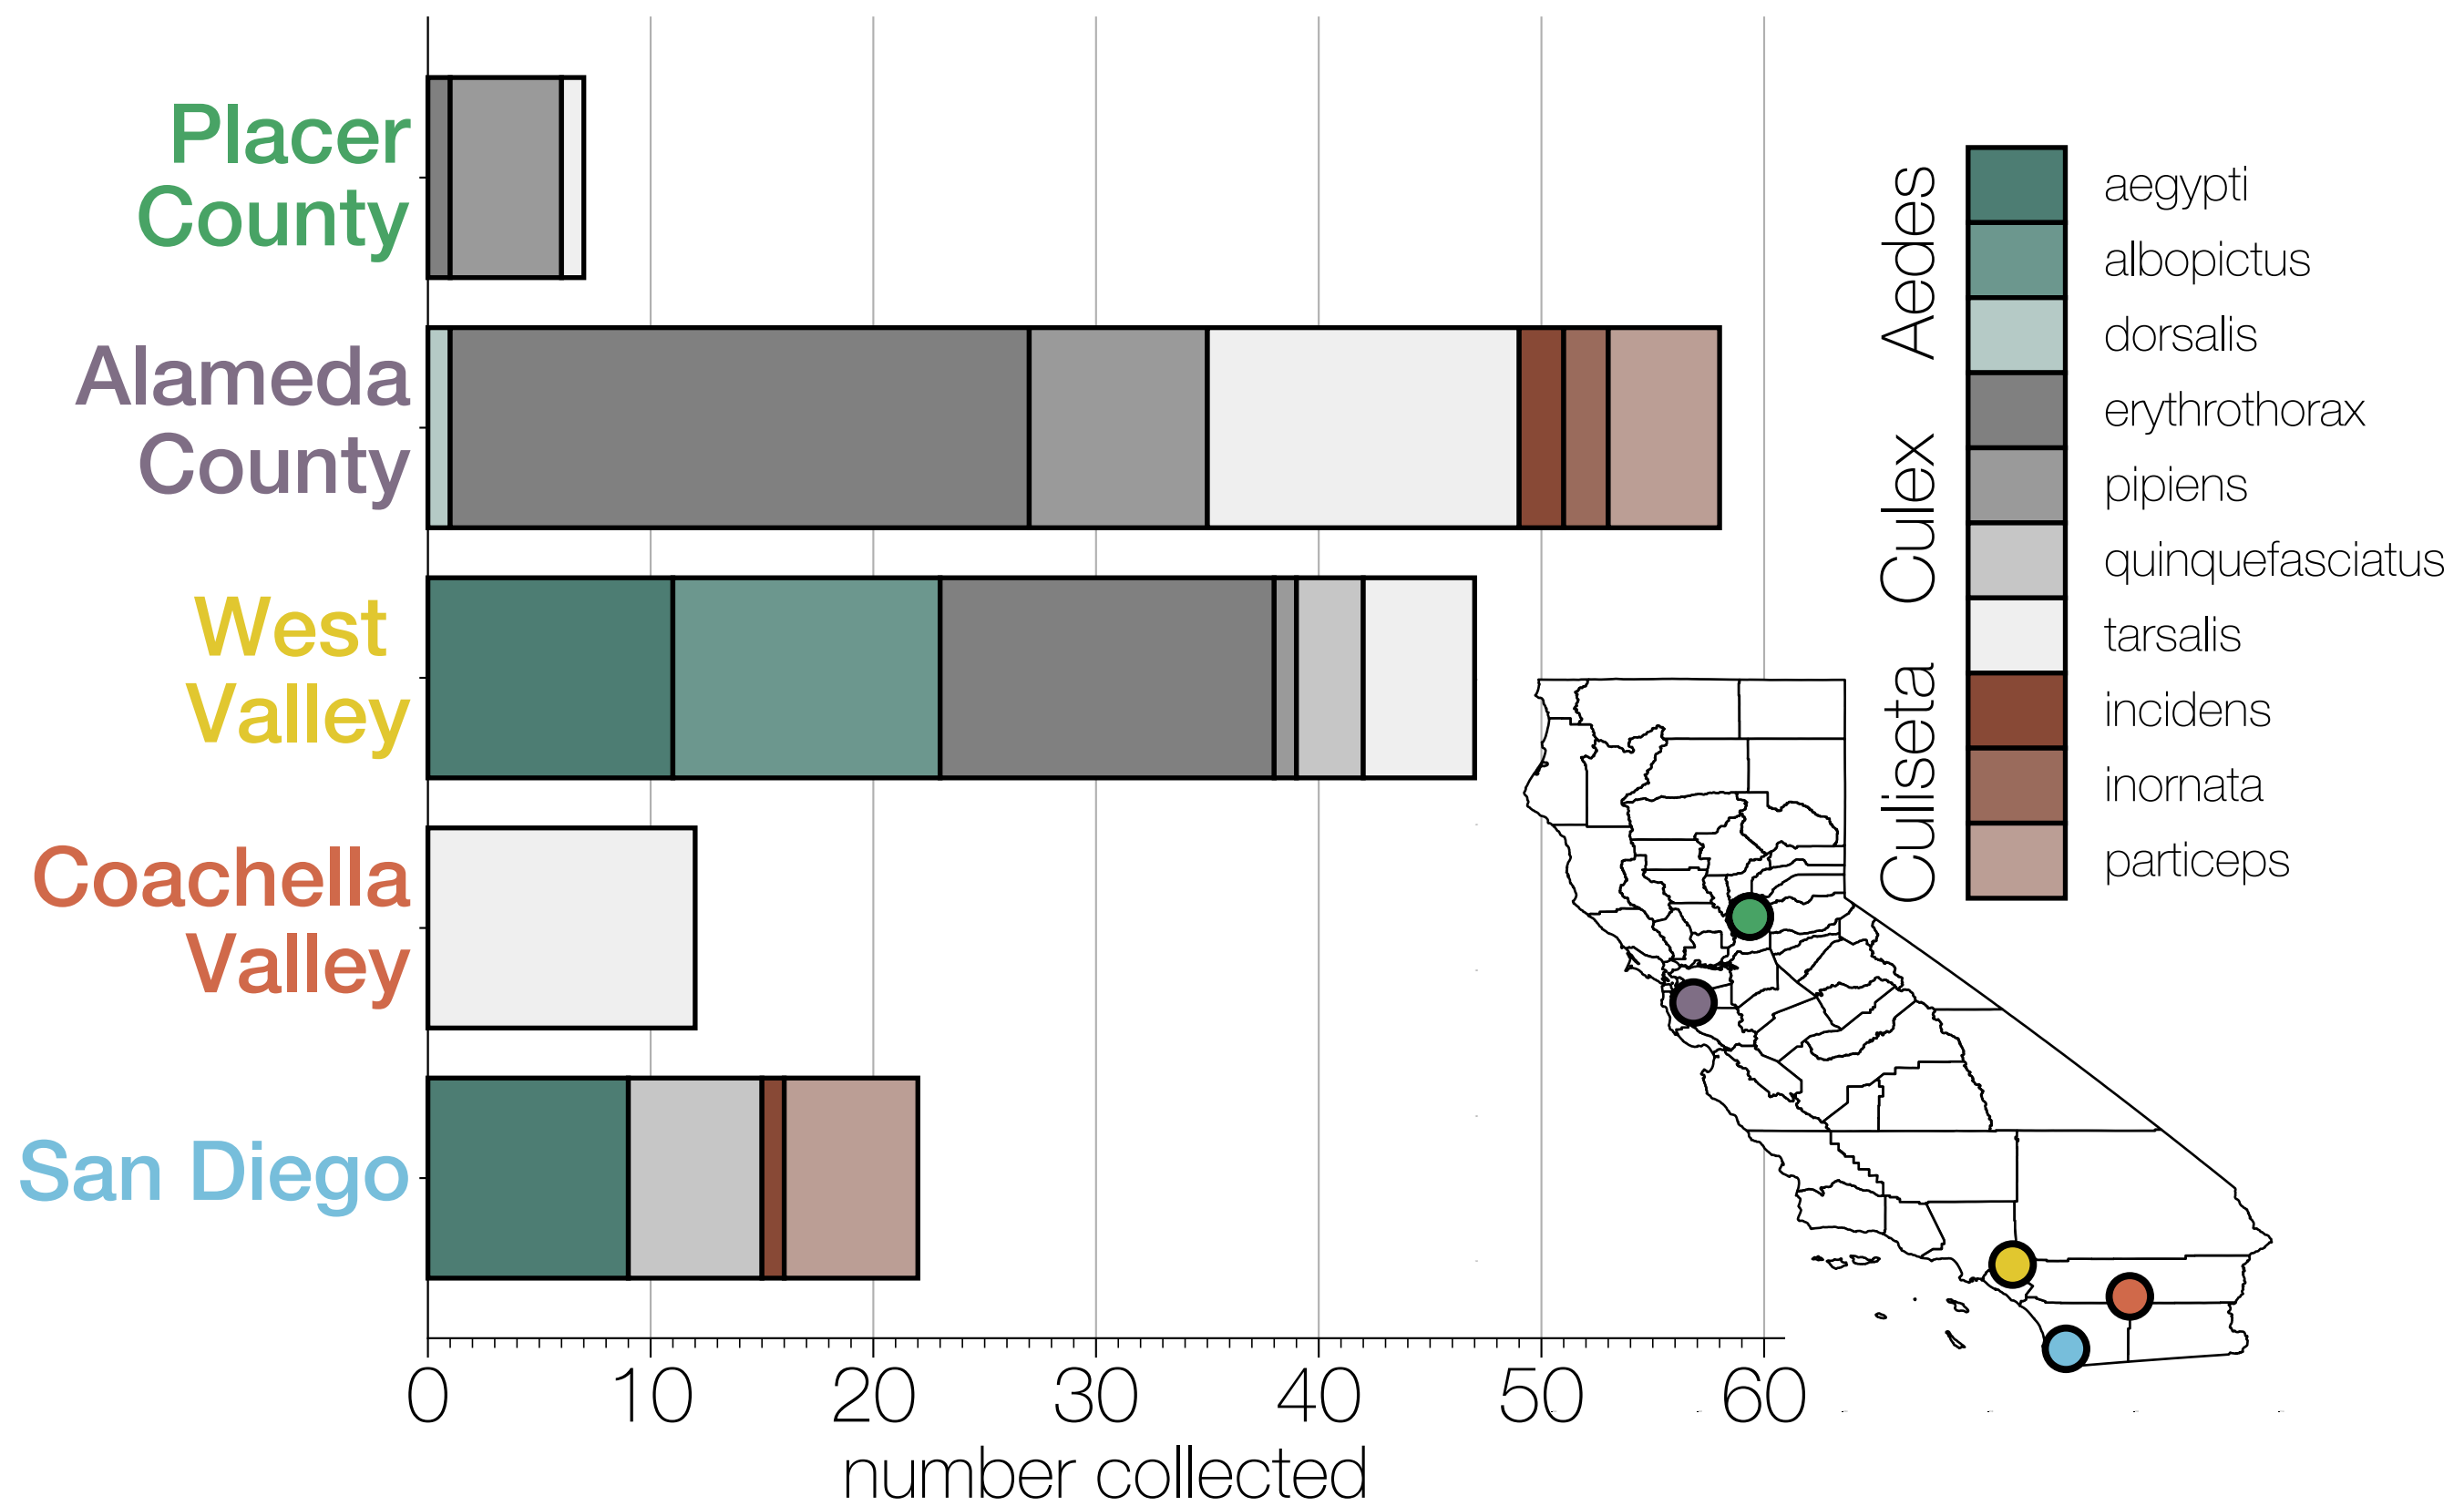

Supplement: supp [file elife-68353-supp-v1.zip]

RdRp

Robin

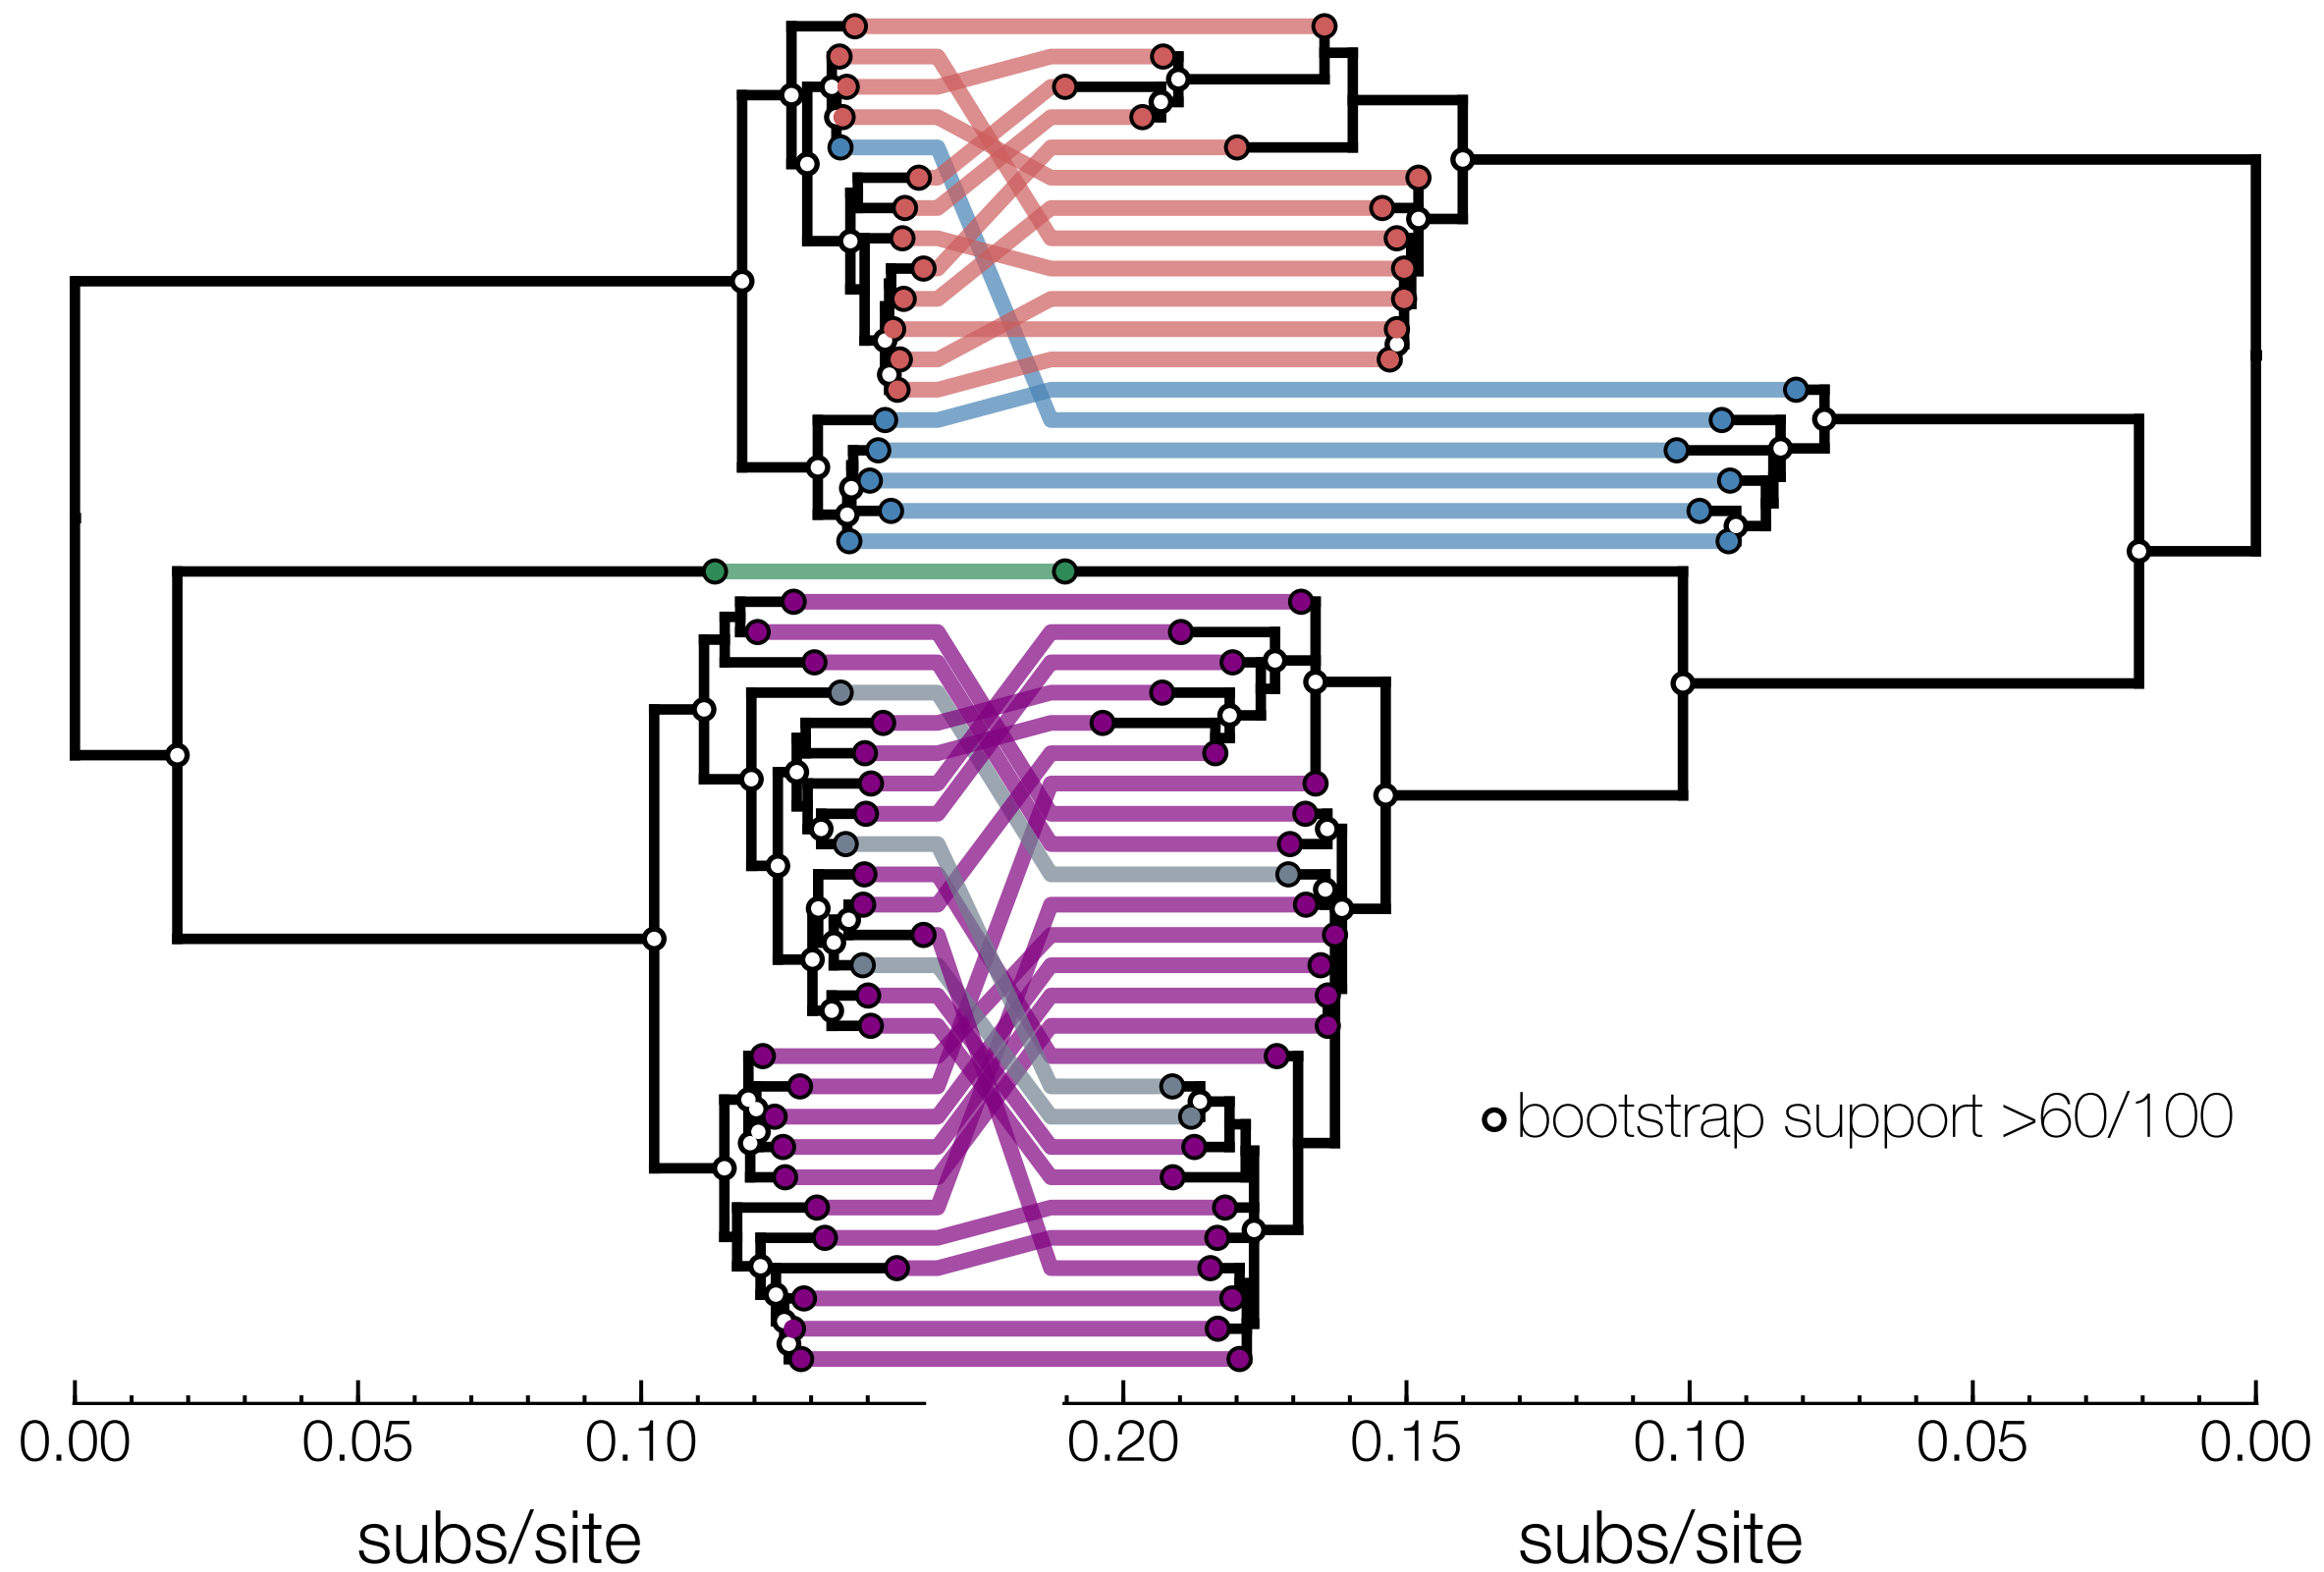

Supplement: supp [file elife-68353-supp-v1.zip]

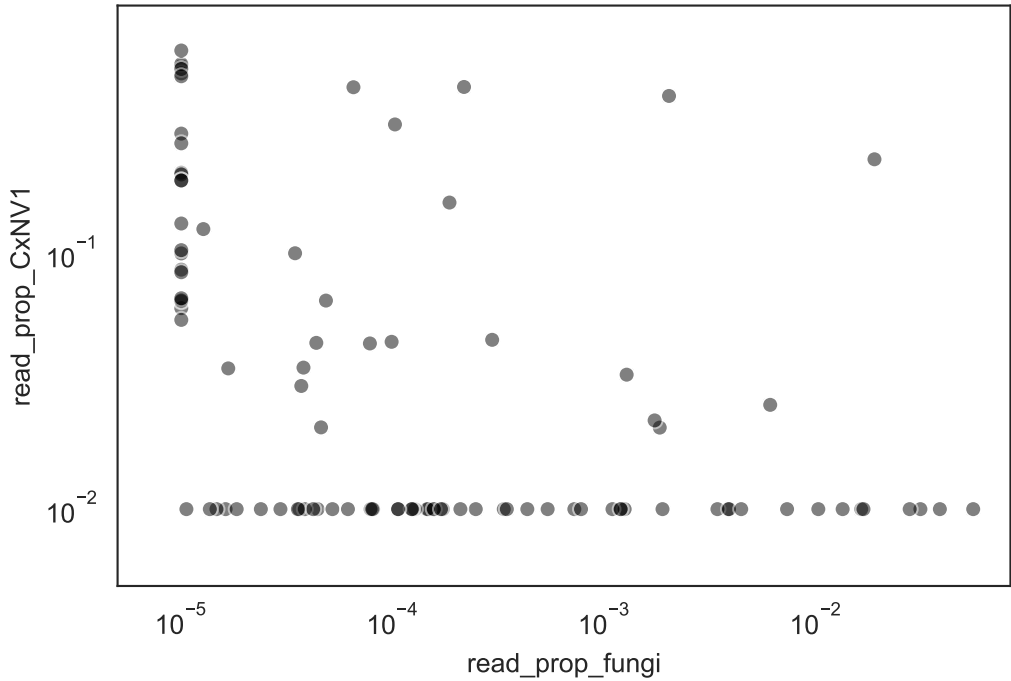

Supplement: supp [file elife-68353-supp-v1.zip]

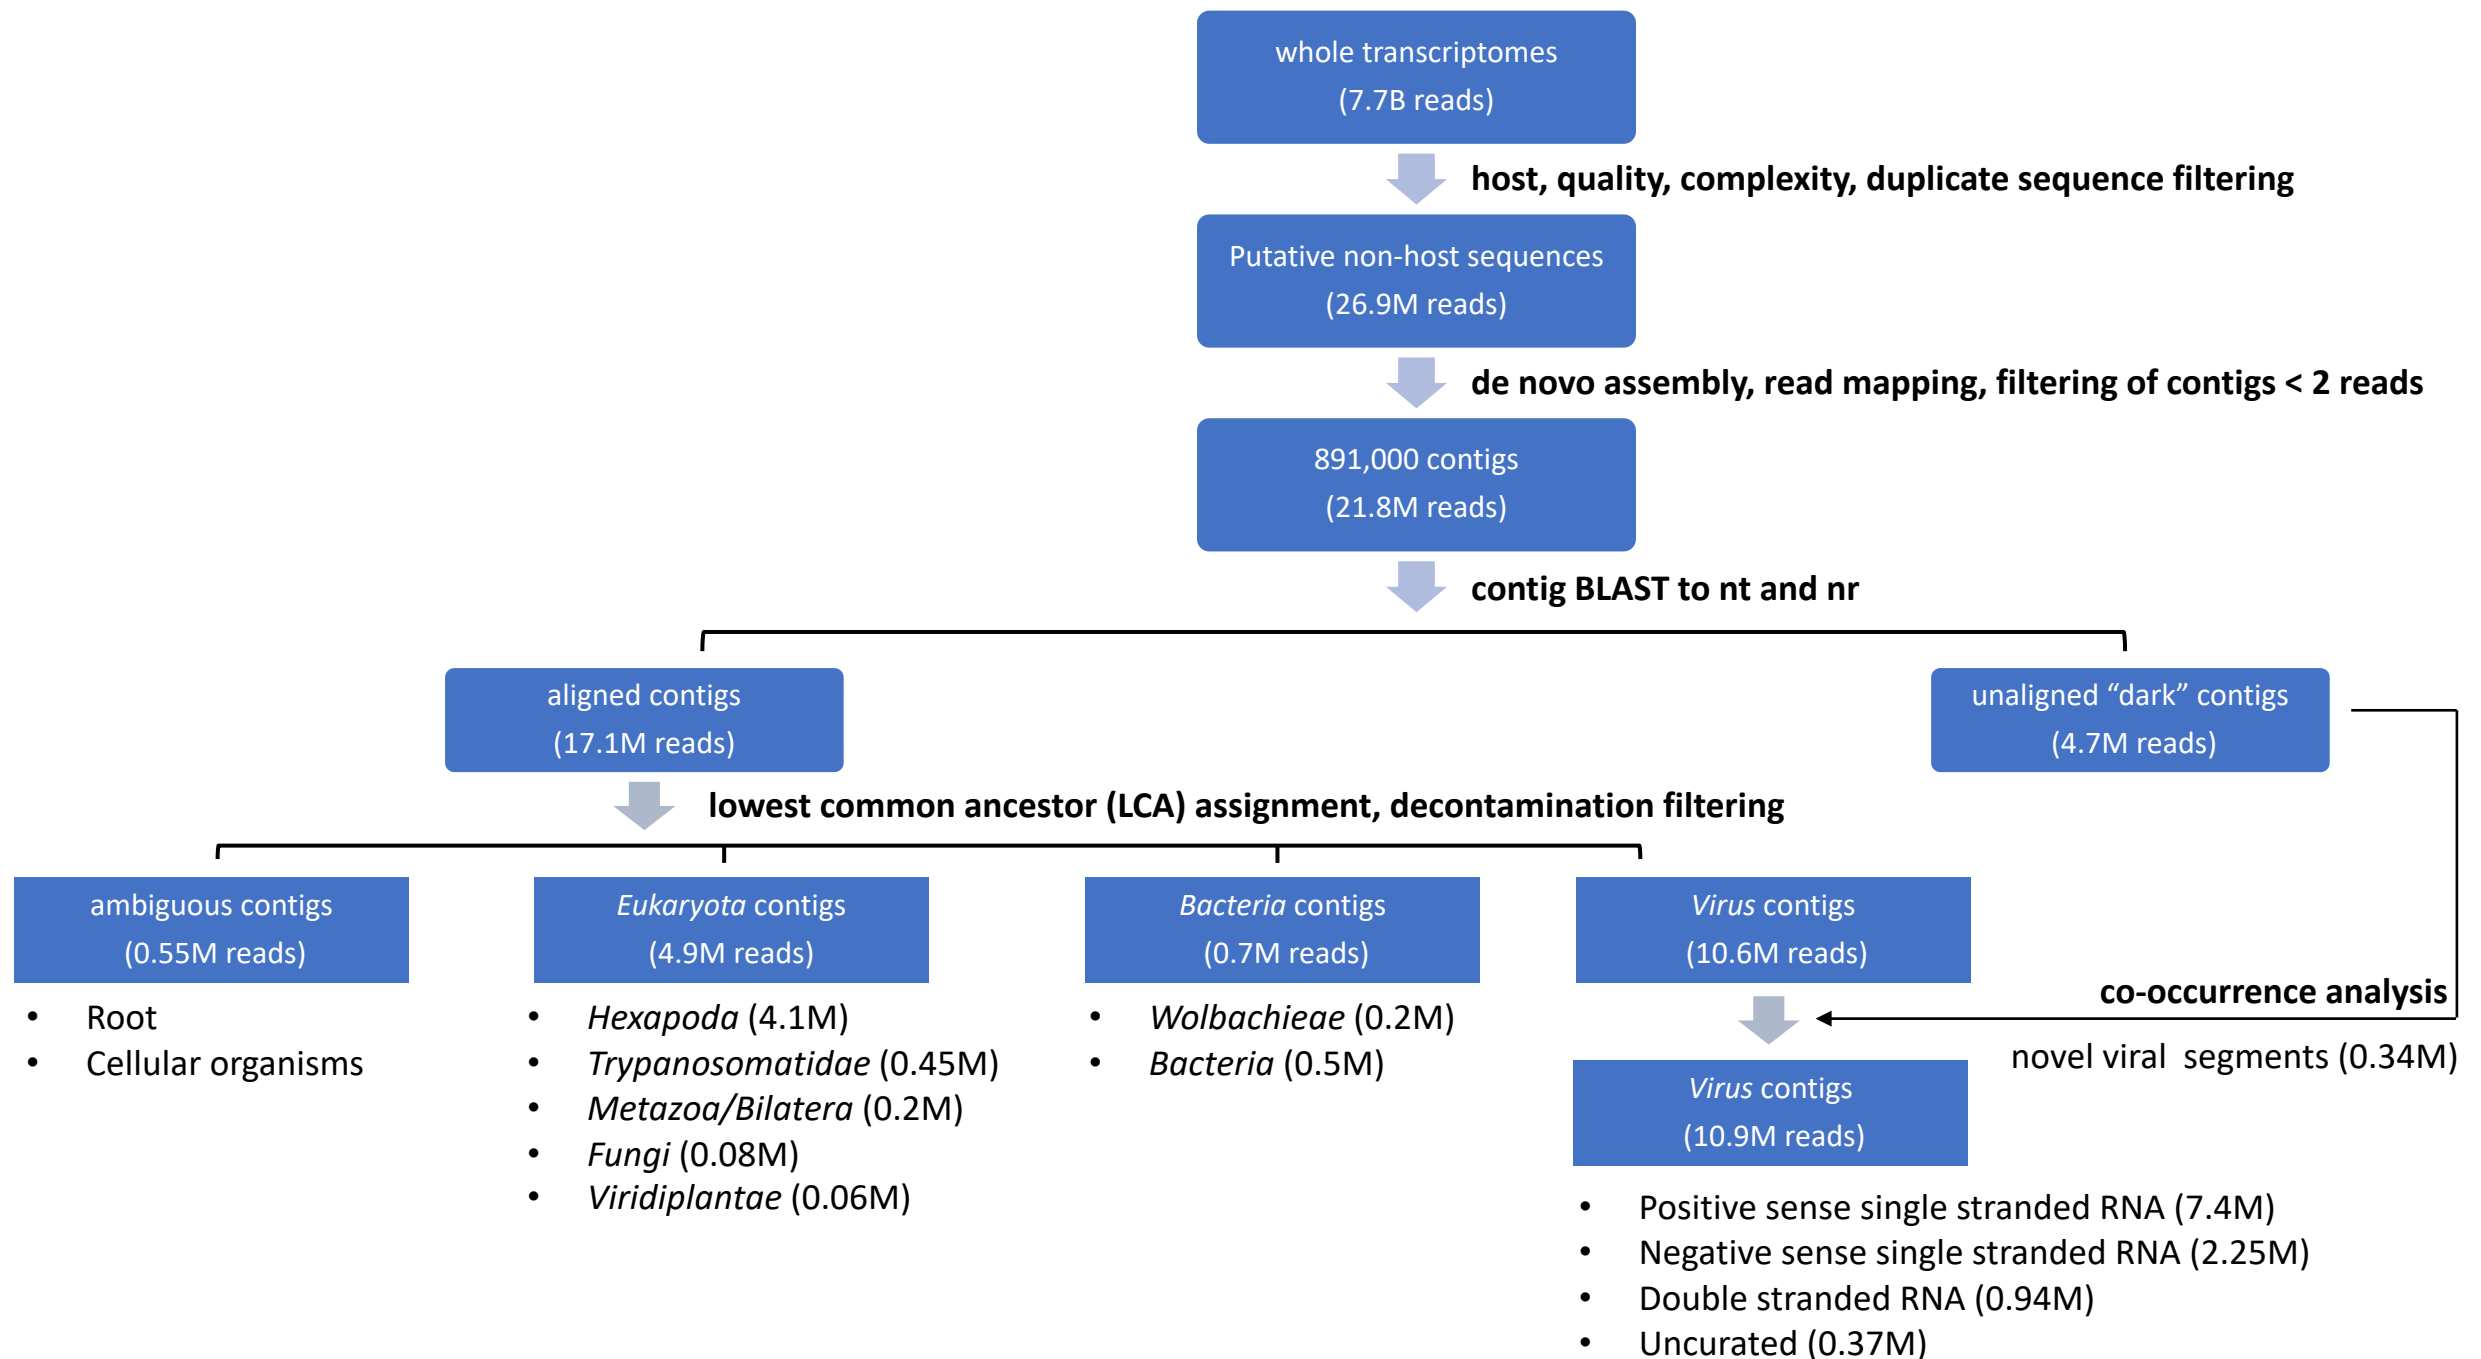

Supplement: supp [file elife-68353-supp-v1.zip]

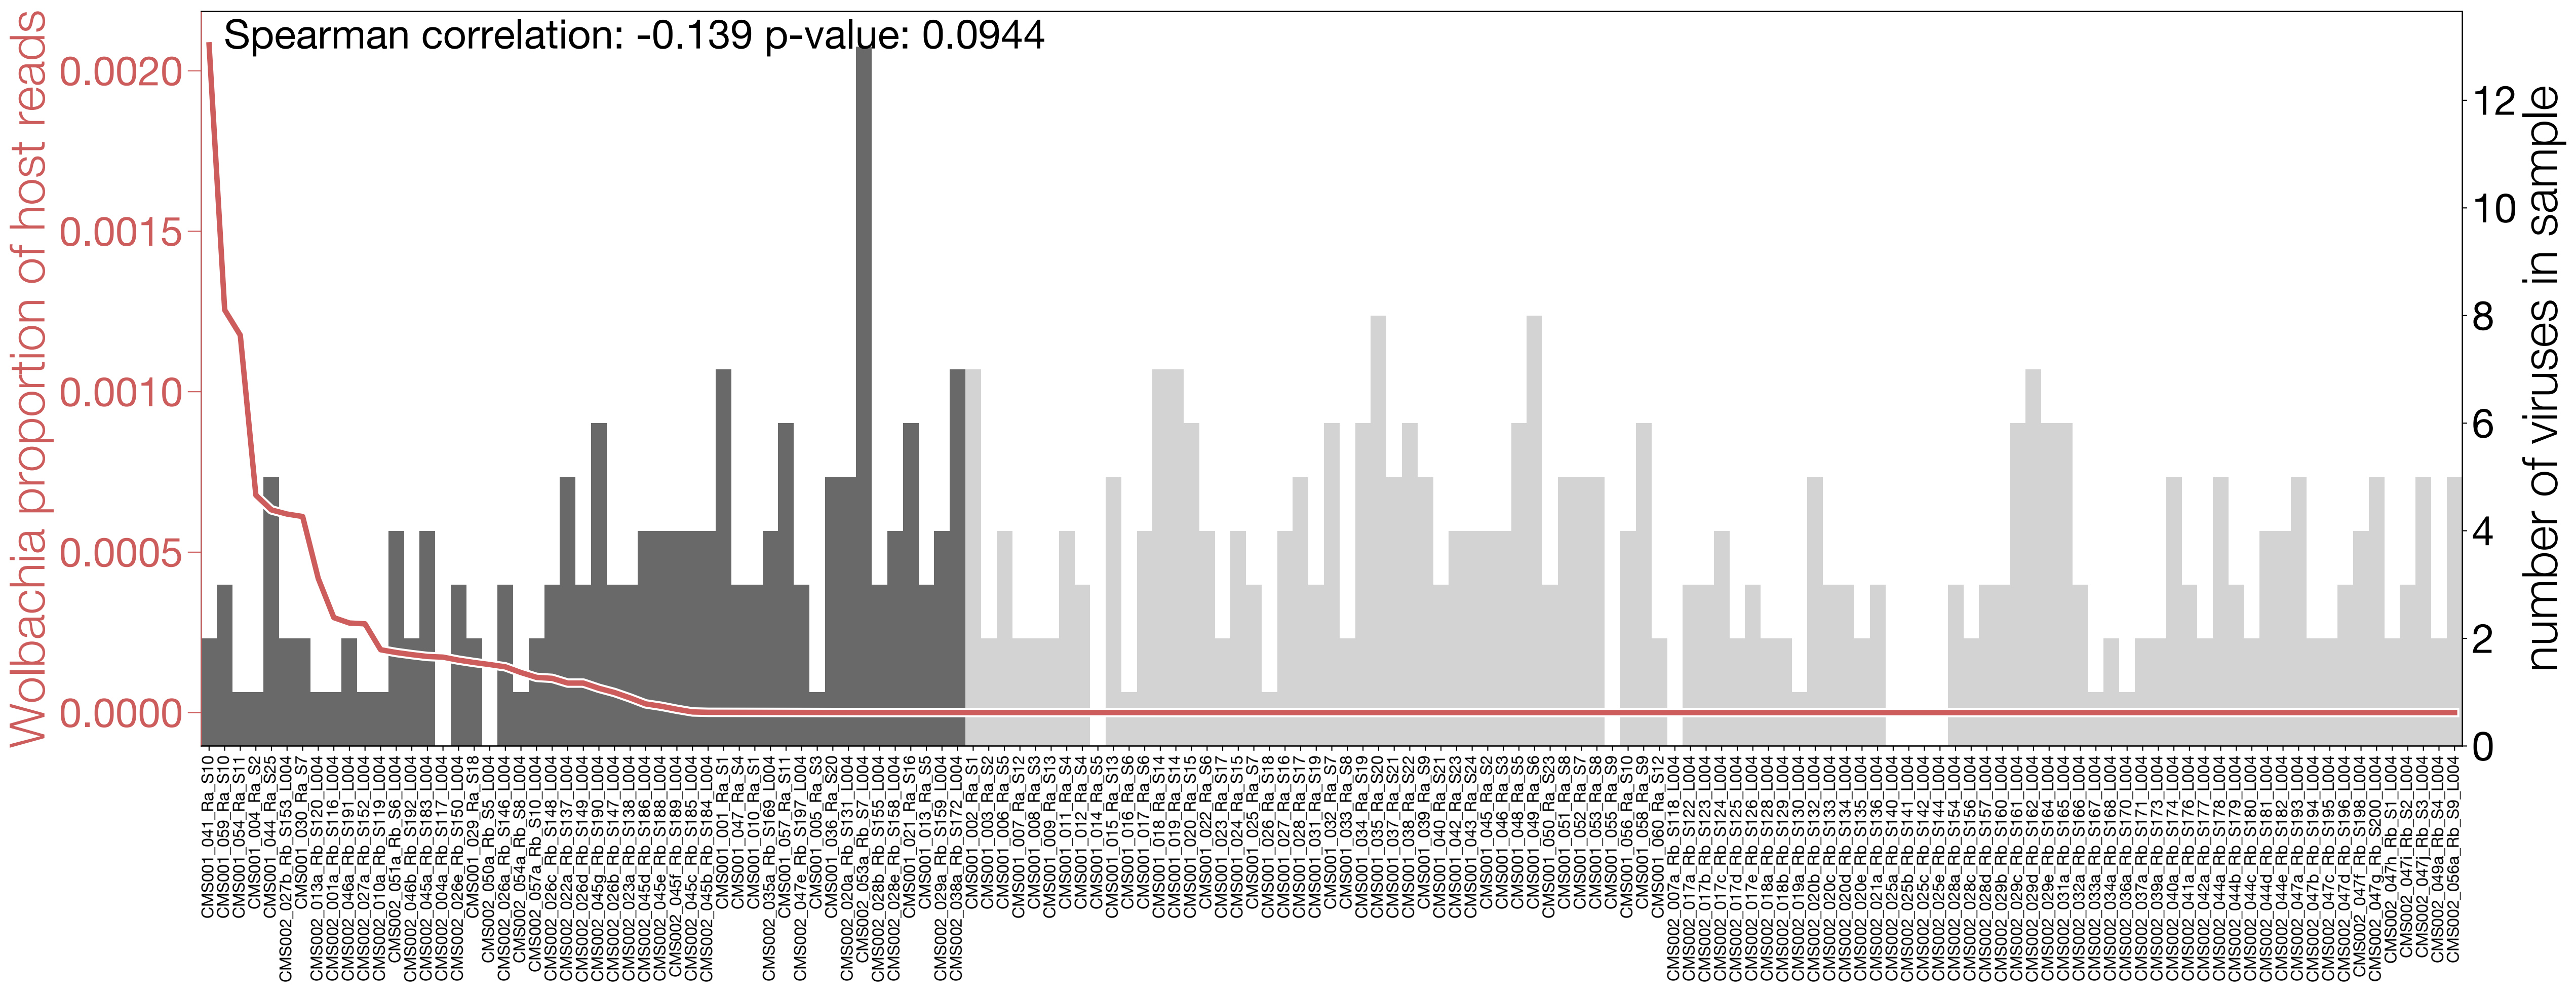

Supplement: supp [file elife-68353-supp-v1.zip]

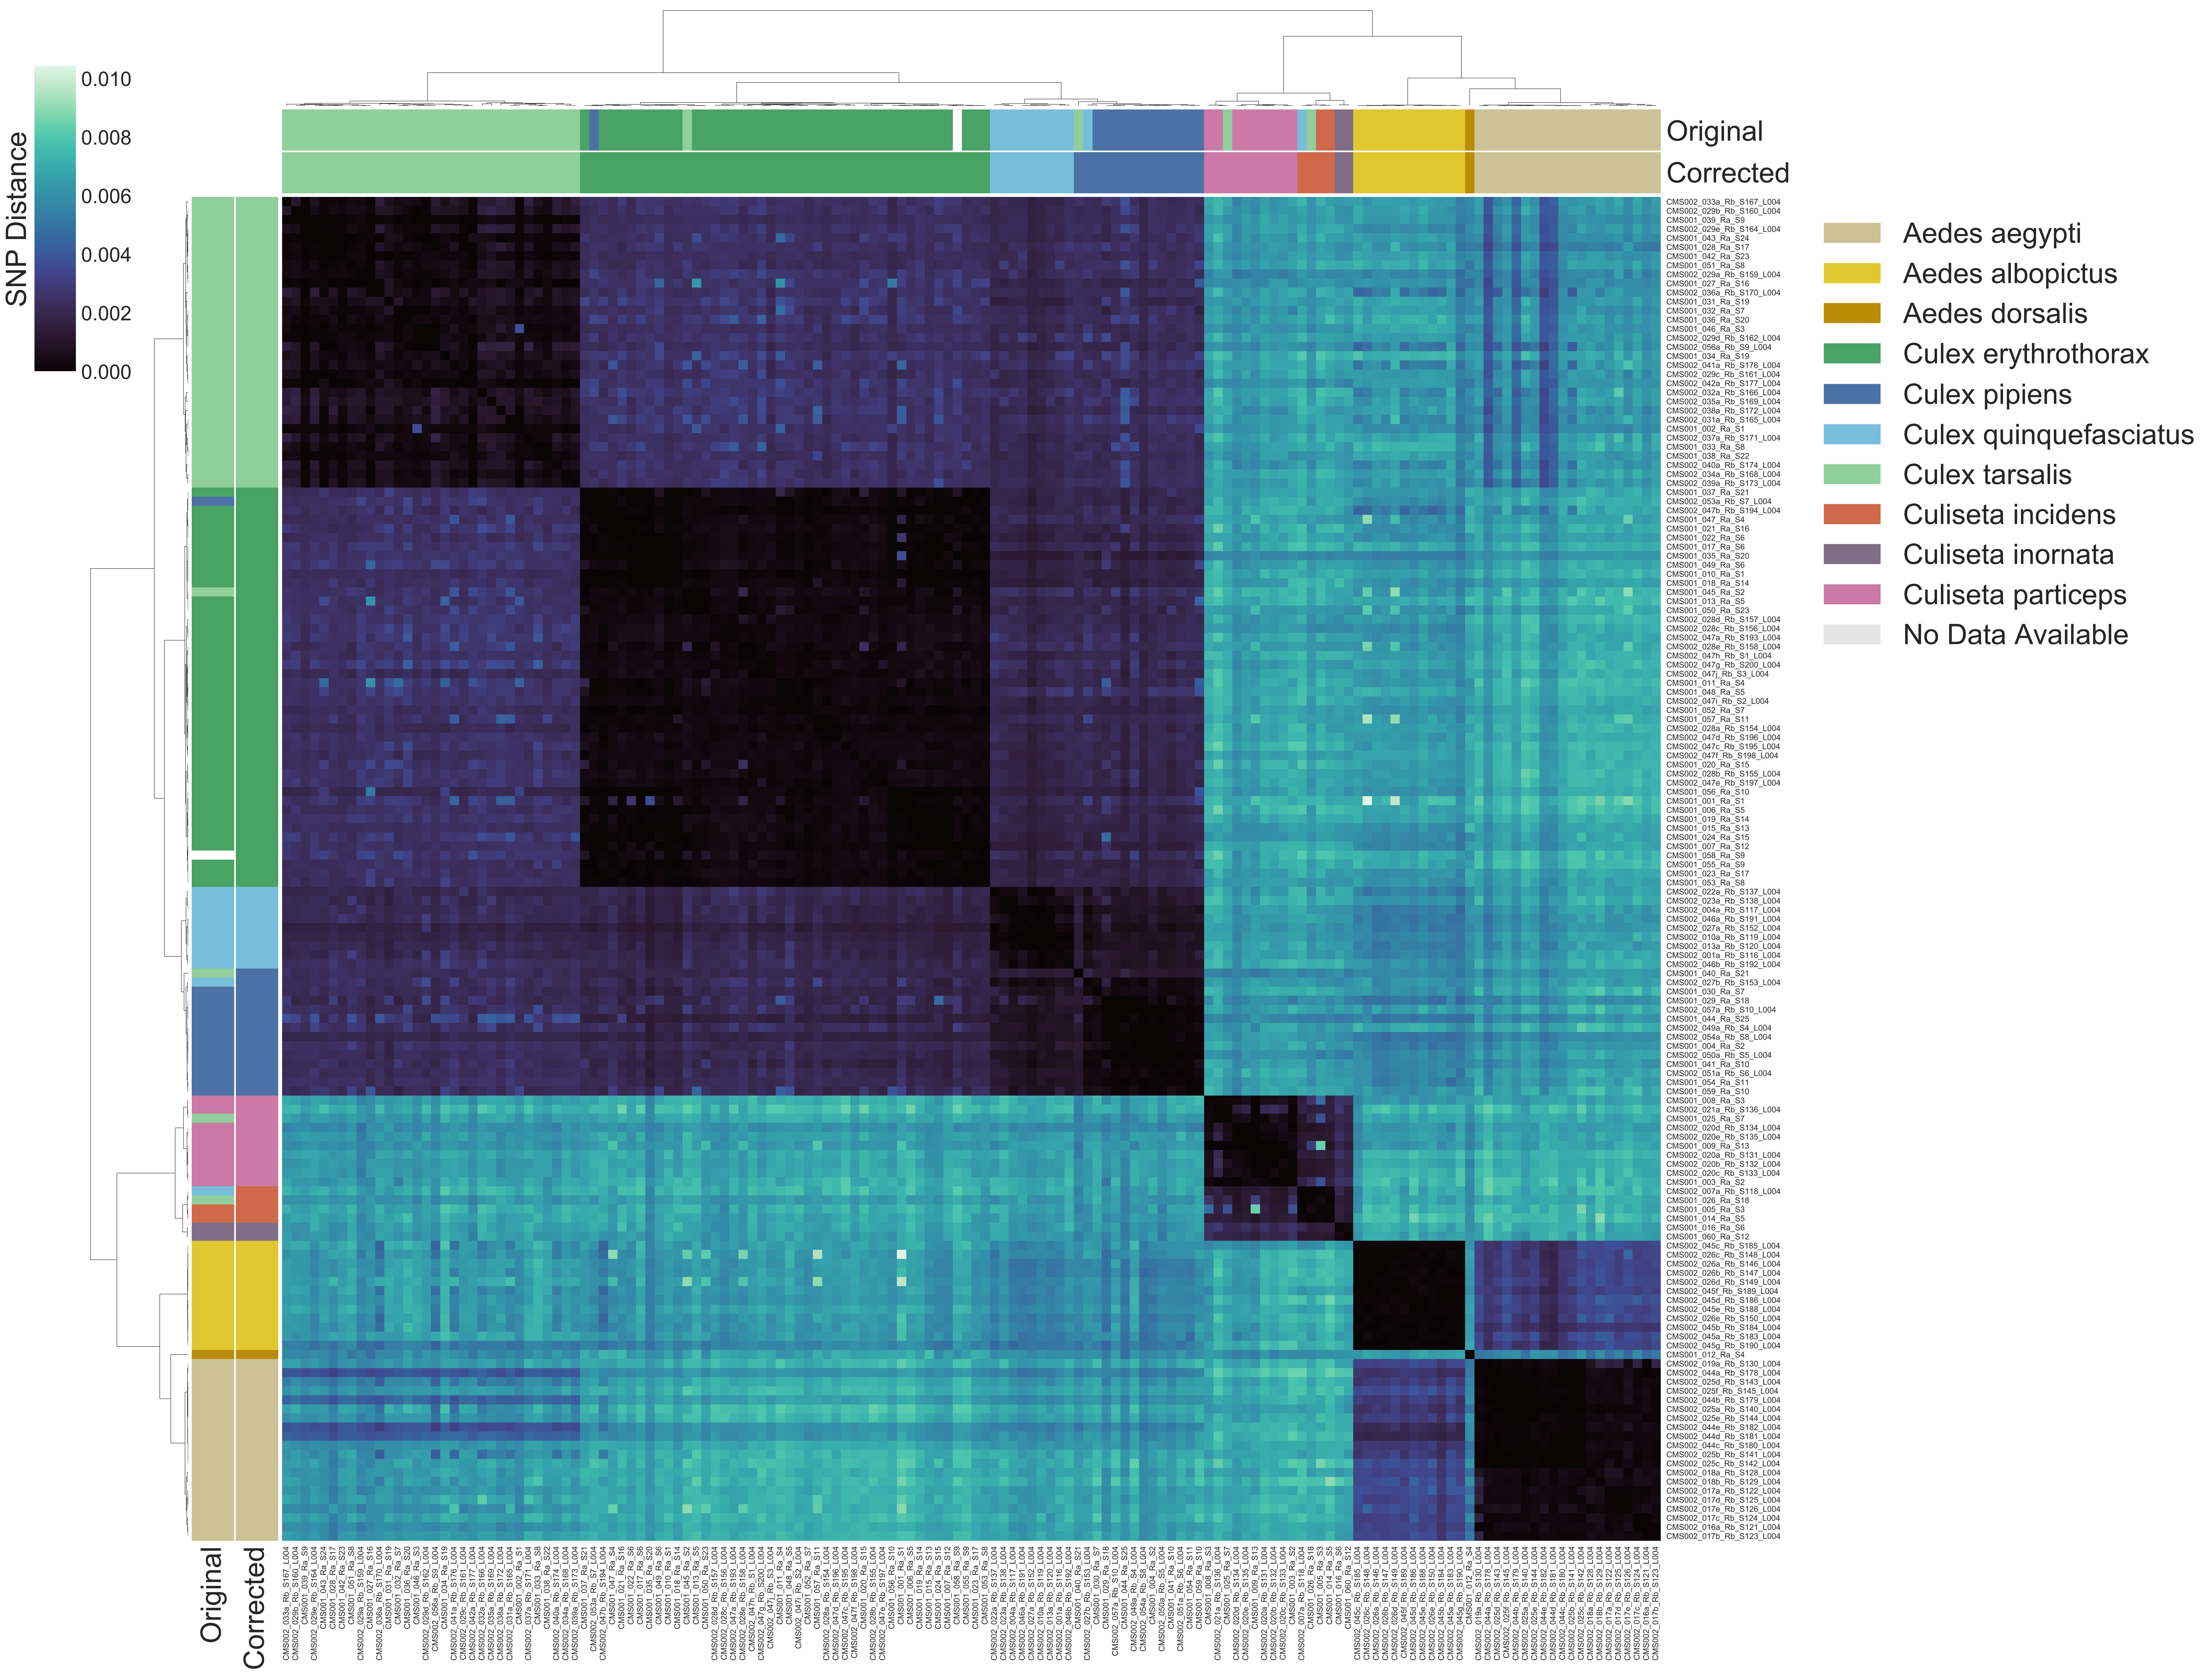

Supplement: supp [file elife-68353-supp-v1.zip]
